# Supplementary material for: "If You Have to Ask, You'll Never Know": Effects of Specialised Stylistic Expertise on Predictive Processing of Music
Source: PLoS One. 2016 Oct 12;11(10):e0163584. doi: 10.1371/journal.pone.0163584 (PMC5061385; doi:10.1371/journal.pone.0163584)
Supplement: S1 Table — (XLSX) [file pone.0163584.s001.xlsx]

## Sheet: by.subject
Participant_ID	Expertise	Gender	Age	Occupational_status	Musical_genre	Obtained_qualification	Expected_qualification	Professional	Instrument	Yrs_formal_music_training	Yrs_daily_music_practice	Hrs_daily_practice_at_peak_of_interest	Gold-MSI_09_F1_(Importance)	Gold-MSI_09_F2_(Perception&Production)	Gold-MSI_09_F3_(MusicalTraining)	Gold-MSI_09_F4_(Emotions)	Gold-MSI_09_F5_(Body)	Gold-MSI_09_F6_(Creativity)	Gold-MSI_09_F7_(Openness)	Gold-MSI_10_F1_(ActiveEngagement)	Gold-MSI_10_F2_(PerceptualAbilities)	Gold-MSI_10_F3_(MusicalTraining)	Gold-MSI_10_F4_(Emotions)	Gold-MSI_10_F5_(SingingAbilities)	Gold-MSI_10_FG_(GeneralSophistication)	Gold-MSI_Genre_prs	Gold-MSI_Genre_rnd	Gold-MSI_Melody_acc	Gold-MSI_Melody_dpr	Gold-MSI_Melody_tpr	Gold-MSI_Melody_fpr	Gold-MSI_Melody_auc	Jazz_concerts_attended	Jazz_concerts_performed	Jazz_course_yes_no	Jazz_collection	Jazz_songs_singorplay	RANK_Jazz_concerts_attended	RANK_Jazz_concerts_performed	RANK_Jazz_collection	RANK_Jazz_songs_singorplay	Jazz_score_COMPLETE	Exp_Bfit_2_32	Exp_Gfit_2_32	Exp_Bfit_2_32	Exp_Gfit_2_32		bG50d_A_p1	bG50d_A_p2
cc01	1	1	30	5	3	5	NA	1	piano	10+	10+	3-4	86	104	55	53	38	54	32	48	57	43	39	40	106	12	0.375	0.846154	2.40615	0.75	0.0416667	0.9375	30	0	yes	70	0	39	35	40	28	142	-0.242908	-0.169891	-0.218229	-0.163826	cc01	3	3
cc03	1	2	27	5	3	5	NA	1	classical_guitar	10+	6-9	5+	80	103	54	49	40	48	34	44	55	44	38	34	96	18	0.6875	0.615385	1.41303	0.375	0.0416667	0.875	20	0	no	50	2	38	35	38	32	143	-0.21504	-0.112128	-0.235095	-0.0874272	cc03	3	8
cc04	1	1	24	5	3	5	NA	1	violin	10+	10+	3-4	79	91	56	48	32	43	38	44	49	43	35	33	95	9	0.21875	0.769231	2.0503	0.625	0.0416667	1	15	0	yes	50	0	36	35	38	28	137	-0.411716	-0.306635	-0.401208	-0.252731	cc04	3	4
cc05	1	2	28	2	3	5	NA	1	piano	10+	10+	5+	79	91	56	45	37	35	36	43	50	43	33	25	85	12	0.375	0.769231	2.0503	0.625	0.0416667	0.85	10	0	no	50	0	34	35	38	28	135	-0.161153	-0.212823	-0.109868	-0.179079	cc05	6	6
cc06	1	1	22	2	3	4	NA	1	violin	10+	10+	3-4	68	103	52	42	32	49	33	39	57	46	32	38	100	12	0.375	0.846154	1.99197	0.875	0.2	0.7625	10	0	no	30	2	34	35	29	32	130	-0.111457	-0.151232	-0.0986034	-0.158594	cc06	3	9
cc07	1	1	29	5	2	5	NA	1	flute	10+	10+	5+	96	99	58	55	44	53	39	54	59	45	41	42	111	12	0.375	0.846154	2.40615	0.75	0.0416667	0.9375	50	1	no	0	0	41	37	12	28	118	-0.0689327	-0.0310617	-0.065486	-0.00664663	cc07	3	2
cc08	1	1	31	5	3	5	NA	1	piano	10+	10+	3-4	75	105	51	48	40	39	35	45	59	43	36	31	92	8	0.166667	0.923077	2.88201	0.875	0.0416667	0.9375	200	0	no	50	0	50	35	38	28	151	-0.302777	-0.275973	-0.314774	-0.280955	cc08	4	6
cc17	1	1	42	3	3	4	NA	1	violin	10+	10+	5+	67	105	53	49	40	43	27	32	58	41	36	35	95	13	0.427083	0.769231	1.51611	0.75	0.2	0.8875	4	20	no	100	0	21	41	43	28	133	-0.179657	-0.191047	-0.138668	-0.146595	cc17	1	6
cc21	1	2	42	5	1	4	NA	1	double_bass	10+	10+	5+	80	99	58	47	38	45	31	44	53	45	35	32	99	8	0.166667	0.769231	2.0503	0.625	0.0416667	0.9	10	0	no	30	3	34	35	29	34	132	-0.239872	-0.142525	-0.209798	-0.128092	cc21	5	5
cc22	1	2	30	5	3	5	NA	1	violin	10+	10+	3-4	96	100	59	56	49	60	42	60	51	45	42	46	119	16	0.583333	0.846154	2.40615	0.75	0.0416667	0.95	10	3	yes	50	4	34	39	38	37	148	-0.12716	-0.207222	-0.117147	-0.196836	cc22	5	7
cc28	1	1	20	2	1	6	5	1	harp	10+	10+	3-4	97	103	54	54	40	38	38	54	58	42	40	30	103	16	0.583333	0.846154	2.40615	0.75	0.0416667	0.975	2	0	no	4	8	16	35	16	39	106	-0.151819	-0.0755281	-0.155668	-0.0652006	cc28	4	5
cc30	1	1	28	5	3	5	NA	1	cello	10+	10+	5+	76	97	59	50	42	43	39	45	52	45	37	34	100	12	0.375	0.769231	2.0503	0.625	0.0416667	0.8875	10	0	no	10	0	34	35	21	28	118	-0.221769	-0.275975	-0.234974	-0.269576	cc30	3	8
cc31	1	1	19	2	1	6	5	1	piano	10+	10+	3-4	98	110	57	55	36	55	42	59	62	44	41	41	113	24	1	0.692308	1.16026	0.625	0.2	0.7125	5	0	no	50	4	25	35	38	37	135	-0.312267	-0.181405	-0.323018	-0.164144	cc31	5	7
cc32	1	1	23	2	3	4	NA	1	violin	10+	10+	5+	91	111	58	51	45	56	40	54	62	44	38	42	108	13	0.427083	0.692308	0.927837	0.75	0.4	0.7875	15	0	yes	0	0	36	35	12	28	111	-0.279763	-0.299943	-0.301231	-0.28041	cc32	3	6
cc33	1	2	28	5	3	5	NA	1	horn	10+	10+	3-4	68	109	59	48	34	48	34	41	60	45	37	37	102	8	0.166667	0.923077	2.88201	0.875	0.0416667	0.925	2	5	no	100	20	16	40	43	42	141	-0.14762	-0.117062	-0.123803	-0.104347	cc33	2	7
cc34	1	1	56	5	3	4	NA	1	piccolo	10+	10+	3-4	77	97	59	48	29	41	29	33	52	45	40	35	98	9	0.21875	0.692308	1.73166	0.5	0.0416667	0.8875	5	0	no	50	50	25	35	38	45	143	-0.373158	-0.19618	-0.392986	-0.174314	cc34	3	2
cc36	1	1	24	3	1	4	NA	1	cello	3-5	10+	1.2	81	93	44	46	47	46	30	42	54	38	37	38	89	13	0.427083	0.769231	1.51611	0.75	0.2	0.8375	4	0	no	3	4	21	35	13	37	106	-0.338626	-0.146262	-0.33661	-0.0948898	cc36	7	5
cc38	1	1	29	4	3	5	NA	1	violin	10+	10+	5+	93	111	63	56	49	62	42	60	62	49	42	48	125	9	0.21875	0.615385	0.841621	0.5	0.2	0.7375	7	3	no	4	6	26	39	16	38	119	-0.204555	-0.143985	-0.222893	-0.139391	cc38	4	8
cc41	1	2	24	2	3	5	NA	1	violin	10+	10+	5+	95	107	59	48	45	48	40	55	61	45	34	41	112	18	0.6875	0.692308	1.73166	0.5	0.0416667	0.75	4	0	no	4	0	21	35	16	28	100	-0.28486	-0.175424	-0.32152	-0.160512	cc41	2	8
cc42	1	1	31	5	3	5	NA	1	cello	10+	10+	5+	77	96	58	48	43	54	37	52	54	45	36	42	108	16	0.583333	0.615385	0.571986	0.625	0.4	0.65	10	1	no	50	2	34	37	38	32	141	-0.313882	-0.278071	-0.319145	-0.252414	cc42	8	8
cj01	2	2	34	5	2	5	NA	1	saxophone	10+	4-5	3-4	79	99	59	47	35	50	34	53	51	45	35	36	107	16	0.583333	0.846154	2.40615	0.75	0.0416667	0.95	500	1000	yes	5000	300	57	62	59	59	237	-0.519995	-0.108974	-0.503007	-0.0286031	cj01	3	3
cj02	2	2	39	5	2	5	NA	1	trumpet	10+	10+	3-4	66	112	57	48	38	57	33	38	63	43	38	43	108	16	0.583333	0.846154	2.40615	0.75	0.0416667	1	150	1000	yes	10000	300	45	62	62	59	228	-0.391848	-0.221758	-0.390065	-0.187247	cj02	1	6
cj07	2	2	59	5	2	5	NA	1	piano	10+	10+	2	77	104	55	48	28	51	36	46	58	41	36	38	99	12	0.375	1	3.46333	0.958333	0.0416667	1	300	200	no	1000	125	51	48	48	53	200	-0.271188	-0.325753	-0.241807	-0.276019	cj07	2	6
cj11	2	2	28	5	2	5	NA	1	guitar	10+	10+	5+	86	108	56	53	40	57	36	52	59	46	39	43	112	16	0.583333	0.692308	1.16026	0.625	0.2	0.7	900	500	yes	100000	150	59	57	63	54	233	-0.383777	-0.271965	-0.375164	-0.265113	cj11	2	7
cj13	2	2	33	4	2	4	NA	1	piano	10+	10+	5+	92	97	58	52	38	50	29	48	54	46	38	38	111	18	0.6875	0.692308	0.927837	0.75	0.4	0.7	100	500	yes	5000	2000	44	57	59	63	223	-0.315538	-0.258458	-0.324515	-0.230356	cj13	3	5
cj14	2	2	26	5	2	4	NA	1	double_bass	10+	10+	5+	94	89	63	48	47	55	39	55	46	49	36	41	112	16	0.583333	0.923077	2.88201	0.875	0.0416667	0.975	1000	800	yes	1000	100	62	59	48	51	220	-0.367787	-0.14463	-0.366137	-0.0871435	cj14	2	6
cj18	2	2	28	5	2	4	NA	1	saxophone	10+	10+	2	91	101	61	43	44	59	36	54	54	47	32	45	114	18	0.6875	0.923077	2.88201	0.875	0.0416667	0.9375	1000	500	yes	8000	100	62	57	60	51	230	-0.44629	-0.0152451	-0.420455	0.0210583	cj18	NA	NA
cj20	2	2	30	5	2	5	NA	1	double_bass	10+	10+	5+	97	112	61	53	47	63	40	58	63	47	39	49	122	13	0.427083	0.846154	2.40615	0.75	0.0416667	0.875	500	1000	yes	10000	100	57	62	62	51	232	-0.462315	-0.273538	-0.466402	-0.236308	cj20	2	6
cj21	2	1	44	5	2	3	NA	1	voice	10+	10+	5+	83	99	47	47	49	56	35	48	55	35	31	43	97	12	0.375	0.923077	2.57329	0.958333	0.2	0.9375	100	100	yes	70	200	44	46	40	57	187	0.0562231	-0.0876147	0.0576013	-0.0434069	cj21	8	8
cj23	2	2	69	5	2	5	NA	1	piano	3-5	10+	2	63	90	47	33	32	48	28	33	45	35	23	36	86	12	0.375	0.769231	2.0503	0.625	0.0416667	0.8	1500	5000	no	5000	500	63	63	59	60	245	-0.284593	-0.15085	-0.284508	-0.141184	cj23	2	6
cj25	2	2	23	5	2	4	NA	1	trombone	10+	10+	5+	94	109	58	51	34	49	41	53	61	44	37	35	104	10	0.270833	0.846154	2.40615	0.75	0.0416667	0.975	200	100	yes	4000	20	50	46	55	42	193	-0.317806	-0.173118	-0.321134	-0.135814	cj25	2	4
cj27	2	1	26	5	2	4	NA	1	voice	6-9	10+	2	98	103	45	54	45	49	38	54	60	32	39	36	99	18	0.6875	0.769231	2.0503	0.625	0.0416667	0.6625	500	80	yes	100	30	57	43	43	43	186	0.0737569	-0.101589	0.0795155	-0.0892711	cj27	5	4
cj28	2	1	54	5	2	4	NA	1	piano	10+	10+	3-4	85	110	53	52	33	43	31	45	61	39	38	29	90	15	0.53125	0.769231	2.0503	0.625	0.0416667	0.875	900	500	yes	900	990	59	57	46	62	224	-0.125663	-0.194307	-0.172894	-0.183377	cj28	7	9
cj30	2	2	21	2	2	5	NA	1	percussion	10+	10+	5+	93	103	56	47	43	54	38	57	57	43	33	40	108	15	0.53125	0.769231	1.51611	0.75	0.2	0.7375	200	80	yes	500	100	50	43	44	51	188	-0.178812	-0.202945	-0.198402	-0.219299	cj30	3	3
cj31	2	2	36	5	2	5	NA	1	piano	10+	10+	5+	89	103	59	54	40	48	33	52	55	45	39	34	104	18	0.6875	0.923077	2.88201	0.875	0.0416667	0.975	200	500	yes	2990	553	50	57	52	61	220	-0.159075	-0.265086	-0.132569	-0.256239	cj31	3	8
cj32	2	2	34	5	2	4	NA	1	piano	6-9	10+	3-4	79	87	53	41	26	43	32	47	45	39	30	30	93	16	0.583333	1	3.46333	0.958333	0.0416667	1	50	400	yes	3000	125	41	50	54	53	198	-0.342247	-0.245582	-0.323001	-0.222122	cj32	3	3
cj33	2	2	28	5	2	4	NA	1	electric_bass	10+	10+	5+	99	106	50	53	44	57	39	57	60	42	39	43	109	18	0.6875	NA	NA	NA	NA	NA	1000	500	yes	600	80	62	57	45	46	210	-0.28803	0.0705096	-0.229131	0.163966	cj33	2	7
cj34	2	2	31	5	2	5	NA	1	bass_guitar	10+	10+	5+	99	108	61	53	43	59	40	60	59	47	39	45	122	13	0.427083	1	3.46333	0.958333	0.0416667	1	100	100	yes	3000	200	44	46	54	57	201	-0.310907	-0.277755	-0.298843	-0.241343	cj34	2	9
cj37	2	2	27	5	2	5	NA	1	piano	10+	10+	5+	101	110	60	51	48	57	35	57	62	46	38	43	117	18	0.6875	0.769231	2.0503	0.625	0.0416667	1	200	200	yes	2000	200	50	48	50	57	205	-0.414761	-0.0572002	-0.457948	-0.0289731	cj37	3	3
cj38	2	2	30	5	2	5	NA	1	saxophone	3-5	10+	5+	86	103	56	48	40	57	40	53	55	42	36	43	110	13	0.427083	1	3.46333	0.958333	0.0416667	1	500	800	yes	5000	50	57	59	59	45	220	-0.445864	-0.110486	-0.468461	-0.0610452	cj38	1	3
cj39	2	1	34	5	2	5	NA	1	saxophone	10+	10+	5+	79	104	54	49	38	54	41	51	57	46	36	40	109	18	0.6875	0.923077	2.88201	0.875	0.0416667	0.9875	500	350	yes	2500	10	57	49	51	40	197	-0.472387	-0.0975468	-0.483217	-0.0429169	cj39	4	5
cj40	2	2	45	5	2	5	NA	1	saxophone	6-9	10+	3-4	78	95	49	41	32	42	34	53	51	35	28	30	88	18	0.6875	0.769231	2.0503	0.625	0.0416667	1	500	500	yes	1200	100	57	57	49	51	214	-0.252058	-0.18404	-0.239013	-0.153381	cj40	4	4
cn02	0	1	50	2	1	5	NA	2	none	0	0	0	64	49	16	47	22	23	29	33	28	12	31	19	50	6	0.0625	0.461538	-0.253347	0.5	0.6	0.4625	20	0	no	20	0	38	35	27	28	128	0.0190741	-0.136516	0.110577	-0.100815	cn02	3	9
cn04	0	2	24	2	1	6	5	2	none	0	0	0	68	63	11	43	31	23	25	37	34	9	29	20	45	15	0.53125	0.769231	1.51611	0.75	0.2	0.875	0	0	no	20	0	9	35	27	28	99	-0.276266	-0.165531	-0.267847	-0.152045	cn04	3	6
cn08	0	2	27	2	3	6	5	2	voice	0	1	1.5	63	80	15	39	35	39	25	35	43	12	27	34	71	8	0.166667	0.846154	2.40615	0.75	0.0416667	0.9875	0	0	no	14	0	9	35	22	28	94	-0.286375	-0.145041	-0.268649	-0.0986528	cn08	4	9
cn09	0	1	46	2	3	5	NA	2	none	0	0	0	36	65	11	36	26	16	28	18	36	7	27	13	34	13	0.427083	0.615385	0.421143	0.75	0.6	0.65	5	0	no	0	0	25	35	12	28	100	-0.242092	-0.0971051	-0.289084	-0.0970726	cn09	3	4
cn10	0	2	30	2	1	5	NA	2	none	0	0	0	65	92	17	41	39	35	26	27	51	12	30	29	64	13	0.427083	0.692308	1.16026	0.625	0.2	0.7625	0	0	no	20	0	9	35	27	28	99	-0.0930944	-0.0626876	-0.11272	-0.0691666	cn10	3	6
cn11	0	2	27	2	1	5	NA	2	drums	0	0	0	38	49	9	29	21	24	18	18	28	7	19	18	38	6	0.0625	0.538462	0.253347	0.5	0.4	0.5625	0	0	no	0	0	9	35	12	28	84	-0.0714935	-0.158258	-0.0581097	-0.166371	cn11	5	6
cn13	0	2	25	2	1	5	NA	2	recorder	0	0	0	84	64	10	52	37	15	36	48	39	7	37	13	49	16	0.583333	0.538462	0.0652923	0.625	0.6	0.5625	9	0	no	20	0	28	35	27	28	118	-0.222355	-0.156701	-0.15394	-0.0732807	cn13	2	2
cn16	0	1	28	3	2	5	NA	2	none	0	0	0	66	78	17	41	32	38	29	30	44	11	29	30	64	9	0.21875	0.692308	0.927837	0.75	0.4	0.7125	1	0	no	20	3	11	35	27	34	107	-0.113711	-0.254046	-0.104876	-0.244063	cn16	6	8
cn17	0	1	26	2	1	6	5	2	voice	0	0	0	68	75	16	44	33	33	35	45	42	11	32	26	63	18	0.6875	0.769231	1.4037	0.875	0.4	0.7375	8	0	no	50	1	27	35	38	29	129	-0.257675	-0.184553	-0.214215	-0.157053	cn17	3	8
cn18	0	2	26	2	1	5	NA	2	none	0	0	0	81	85	18	39	41	44	32	40	52	13	28	36	74	8	0.166667	0.769231	1.4037	0.875	0.4	0.8	2	0	no	5	0	16	35	17	28	96	-0.0499199	-0.18075	-0.0136379	-0.14819	cn18	4	6
cn19	0	1	35	2	1	5	NA	2	voice	0	0	0	46	61	18	40	38	15	26	20	34	11	28	12	36	16	0.583333	0.692308	0.927837	0.75	0.4	0.75	2	0	no	0	0	16	35	12	28	91	-0.28483	-0.0943117	-0.348768	-0.0756487	cn19	5	8
cn23	0	1	43	7	1	4	NA	2	none	0	0	0	63	78	11	51	42	34	30	30	43	9	37	28	58	15	0.53125	0.615385	0.571986	0.625	0.4	0.75	0	0	no	0	0	9	35	12	28	84	-0.108266	-0.130921	-0.0783268	-0.0946493	cn23	8	2
cn24	0	2	35	5	1	4	NA	2	voice	0	0	0	58	81	16	36	25	40	20	26	42	11	27	31	58	7	0.114583	0.538462	0.253347	0.5	0.4	0.6875	0	0	no	0	0	9	35	12	28	84	-0.0629341	-0.113409	-0.0422231	-0.103843	cn24	7	9
cn27	0	1	38	4	2	3	NA	2	none	0	0	0	91	73	9	48	44	33	39	54	39	7	29	28	62	18	0.6875	0.692308	0.897002	0.875	0.6	0.5625	3	0	no	10	0	18	35	21	28	102	-0.0893644	0.0491383	-0.155495	-0.00163059	cn27	9	9
cn28	0	2	40	5	1	4	NA	2	none	0	0	0	73	95	9	49	40	26	27	35	52	7	35	20	57	12	0.375	0.692308	0.927837	0.75	0.4	0.85	3	0	no	10	0	18	35	21	28	102	-0.17378	-0.137082	-0.170705	-0.124156	cn28	8	9
cn29	0	2	53	8	1	3	NA	2	Voice	0	0	0.5	64	80	13	41	38	33	32	31	49	11	29	25	57	9	0.21875	0.692308	0.927837	0.75	0.4	0.775	0	0	no	0	0	9	35	12	28	84	-0.168944	-0.111767	-0.179033	-0.0919594	cn29	4	8
cn33	0	2	25	5	1	4	NA	2	piano	2	1	1	74	64	22	43	34	32	33	41	36	18	30	23	59	12	0.375	0.538462	0.253347	0.5	0.4	0.6875	5	0	no	10	0	25	35	21	28	109	-0.0523521	-0.0988518	-0.0385765	-0.0819684	cn33	7	7
cn36	0	1	19	7	1	3	NA	2	drums_voice	0	0	0	74	69	15	52	41	32	28	45	43	10	36	25	60	12	0.375	0.615385	0.571986	0.625	0.4	0.75	0	0	no	0	0	9	35	12	28	84	-0.040823	-0.146522	-0.0213755	-0.132941	cn36	5	7
cn37	0	2	20	2	1	6	5	2	voice	0	0	0	84	108	25	49	49	49	35	46	62	18	36	43	94	16	0.583333	0.538462	0.253347	0.5	0.4	0.5875	1	0	no	0	0	11	35	12	28	86	-0.00501659	-0.149503	0.0271949	-0.133674	cn37	5	5
cn38	0	2	23	7	1	4	NA	2	voice	0	0	0	65	81	11	38	43	29	26	31	44	8	27	23	52	12	0.375	0.615385	0.571986	0.625	0.4	0.7125	2	0	no	0	0	16	35	12	28	91	-0.173504	-0.302979	-0.133785	-0.286565	cn38	2	7
																																					These two people answered "NA". Their responses have been replaced by the median of responses from the other jazz participants
												MIN_classical	67	91	44	42	29	35	27	32	49	38	32	25	85	8	0.166667	0.615385	0.571986	0.375	0.0416667	0.65										Classical	-0.234449	-0.184519	-0.232036	-0.165299	Classical	3.85	6
												MIN_jazz	63	87	45	33	26	42	28	33	45	32	23	29	86	10	0.270833	0.692308	0.927837	0.625	0.0416667	0.6625										Jazz	-0.300953	-0.168088	-0.298162	-0.133824	Jazz	3.04762	5.47619
												MAX_non	91	108	25	52	49	49	39	54	62	18	37	43	94	18	0.6875	0.846154	2.40615	0.875	0.6	0.9875										Non	-0.137686	-0.13887	-0.12568	-0.121687	Non	4.8	6.75
																																										All	-0.226833	-0.163963	-0.221192	-0.140062	All	3.88525	6.06557
																						Mus_training			General
												MIN_classical	82.95	101.7	56.1	49.8	40	48	35.9	47.4	56.25	44	37.45	37.2	102.8	12.9	0.421875	0.765385	1.84961	0.675	0.117083	0.859375															B.prob.run2_32	0.00211287	0.0110929
												MIN_jazz	86.7273	102.364	55.3636	48.4545	39.2727	52.6364	35.8182	51.0909	55.9545	42.4545	35.4091	39.0909	105.5	15.4091	0.552557	0.857143	2.44929	0.787698	0.0813492	0.908929															G.prob.run2_32	0.0128663	0.211589
												MAX_non	66.25	74.5	14.45	42.9	35.55	30.65	28.95	34.5	42.05	10.55	30.15	24.8	57.25	12.05	0.377604	0.646154	0.773035	0.675	0.402083	0.71125															B.IC.run2_32	8.88658	6.49421
																																															G.IC.run2_32	6.28026	2.24067
																																															Diff.IC.run2_32	2.60632	4.25355
[truncated: 434 more columns]

## Sheet: by.context
	B.prob.run2_32	G.prob.run2_32	B.IC.run2_32	G.IC.run2_32	Diff.IC.run2_32	cc01	cc03	cc04	cc05	cc06	cc07	cc08	cc17	cc21	cc22	cc28	cc30	cc31	cc32	cc33	cc34	cc36	cc38	cc41	cc42	cj01	cj02	cj07	cj11	cj13	cj14	cj18	cj20	cj21	cj23	cj25	cj27	cj28	cj30	cj31	cj32	cj33	cj34	cj37	cj38	cj39	cj40	cn02	cn04
bG50d_A_p1	0.00211287	0.0128663	8.88658	6.28026	2.60632	3	3	3	6	3	3	4	1	5	5	4	3	5	3	2	3	7	4	2	8	3	1	2	2	3	2	NA	2	8	2	2	5	7	3	3	3	2	2	3	1	4	4	3	3
bG50d_A_p2	0.0110929	0.211589	6.49421	2.24067	4.25355	3	8	4	6	9	2	6	6	5	7	5	8	7	6	7	2	5	8	8	8	3	6	6	7	5	6	NA	6	8	6	4	4	9	3	8	3	7	9	3	3	5	4	9	6
bG50d_A_p3	0.00147673	0.00330414	9.40337	8.24151	1.16186	3	4	3	4	5	2	3	4	5	1	3	5	3	1	7	2	8	5	3	8	2	1	2	2	3	1	2	1	6	2	1	5	9	5	4	3	5	1	2	2	2	4	8	4
bG50d_A_p4	0.00871141	0.12042	6.84288	3.05385	3.78903	6	6	3	5	5	4	7	5	5	1	2	7	8	4	3	7	8	5	5	7	5	3	6	5	7	3	3	8	8	3	7	5	8	9	6	4	2	8	3	2	2	4	9	4
bG50d_A_p5	0.000903557	0.264005	10.1121	1.92136	8.19073	1	2	2	4	3	3	6	8	2	4	1	6	3	8	3	1	4	3	6	6	1	3	3	4	7	2	3	3	8	2	1	3	6	2	7	4	4	7	2	1	3	4	8	4
bG50d_A_p6	0.911254	0.0110646	0.134075	6.4979	-6.36383	6	9	9	7	9	7	9	9	4	8	6	9	8	8	2	9	9	6	7	9	9	9	9	9	8	6	NA	9	7	8	8	1	7	9	8	8	8	9	9	9	9	8	8	5
bG50d_A_p7	0.00436755	0.186111	7.83896	2.42576	5.4132	7	6	3	7	9	5	7	8	6	5	7	7	5	4	2	4	9	6	4	9	3	2	6	3	2	4	2	6	8	2	2	3	7	7	4	5	7	8	2	1	2	5	9	6
bG50d_A_p8	0.000907609	0.00143012	10.1056	9.44964	0.655998	6	1	2	6	4	9	4	9	2	4	7	5	2	1	3	3	6	4	6	7	3	1	4	2	1	2	2	1	8	1	1	3	9	6	7	1	5	1	2	1	3	4	5	1
bG50d_A_p9	0.00256636	0.0806065	8.60606	3.63296	4.9731	7	2	6	5	6	6	9	9	4	1	6	8	8	9	4	3	9	4	7	8	3	4	6	4	1	7	NA	6	7	3	3	5	9	8	5	4	3	4	3	6	1	7	8	5
bG50d_Bt_p1	0.0417214	0.00168402	4.58307	9.21387	-4.63081	2	7	1	3	2	8	7	1	2	3	2	2	4	5	2	1	5	4	2	5	1	2	3	8	3	4	NA	3	8	2	1	6	5	8	3	2	1	1	1	2	3	3	7	3
bG50d_Bt_p2	0.917161	0.281045	0.124753	1.83113	-1.70637	3	9	9	8	7	5	7	9	3	3	6	8	6	5	3	1	8	4	7	2	4	7	7	7	8	4	4	7	5	2	3	7	6	9	8	9	4	4	4	3	5	3	5	3
bG50d_Bt_p3	0.000268948	0.113712	11.8604	3.13654	8.72385	4	1	1	3	3	4	6	1	2	8	2	2	4	2	8	1	5	5	3	1	2	1	4	6	6	4	3	2	4	2	2	4	2	2	6	3	1	2	2	1	2	4	3	3
bG50d_Bt_p4	0.00183708	0.0404415	9.08837	4.62802	4.46035	9	8	9	9	8	5	9	9	9	9	9	9	7	7	2	9	9	8	7	9	8	9	9	8	7	9	9	7	8	9	8	6	9	7	9	8	9	9	9	9	9	5	2	5
bG50d_Bt_p5	0.00242704	0.184842	8.68659	2.43563	6.25095	9	8	3	6	8	2	6	2	7	7	4	5	2	1	3	1	5	5	8	7	2	2	8	6	9	2	4	4	8	2	2	6	6	9	7	4	3	6	2	1	3	3	6	5
bG50d_Bt_p6	0.000403422	0.00168402	11.2754	9.21387	2.06155	2	2	2	2	2	3	1	1	1	4	1	1	4	2	2	1	2	3	7	4	1	2	2	2	3	4	NA	2	8	2	1	7	5	8	3	1	3	1	2	1	1	5	7	4
bG50d_Bt_p7	0.00122545	0.211368	9.67248	2.24217	7.4303	5	3	3	4	5	8	7	1	2	2	4	4	8	4	7	3	5	6	2	2	5	2	7	8	9	2	3	8	6	6	3	4	7	9	8	8	1	8	4	4	5	5	3	5
bG50d_Bt_p8	0.00018436	0.00168402	12.4052	9.21387	3.19132	6	9	4	3	8	8	7	9	4	4	7	1	7	3	3	1	2	6	2	2	2	5	7	2	2	6	4	7	8	2	1	8	4	5	8	3	9	2	3	5	2	2	8	2
bG50d_Bt_p9	6.50681e-05	0.0117398	13.9077	6.41245	7.49524	1	4	4	2	4	8	4	5	2	7	9	7	3	4	7	1	4	4	5	8	2	1	6	4	4	4	2	4	7	7	1	9	9	2	5	1	2	1	1	2	2	2	7	3
bG50d_C_p1	0.00060947	0.00156099	10.6802	9.32333	1.35683	6	3	3	5	3	2	5	4	5	2	7	2	1	2	3	4	5	4	2	4	4	5	5	8	8	2	4	7	7	8	9	4	5	4	7	4	8	3	6	8	4	5	6	7
bG50d_C_p2	0.0318796	0.280956	4.97122	1.83159	3.13964	8	8	6	8	8	5	9	9	5	5	9	4	1	4	4	8	7	5	5	6	7	9	6	4	7	5	NA	5	9	9	8	4	7	6	6	7	8	7	9	6	7	5	9	4
bG50d_C_p3	0.0417214	0.113222	4.58307	3.14278	1.44029	6	6	1	6	2	2	5	4	5	1	6	2	1	1	4	6	3	5	2	7	8	6	5	6	8	2	NA	4	6	3	7	5	8	4	6	7	6	2	8	7	8	6	2	4
bG50d_C_p4	0.917161	0.0406501	0.124753	4.6206	-4.49585	8	7	9	8	9	3	8	9	7	7	5	8	7	8	6	7	9	6	9	9	9	9	9	8	7	7	NA	9	8	8	9	4	9	4	8	8	6	9	9	9	7	6	4	4
bG50d_C_p5	0.000268948	0.186832	11.8604	2.42019	9.4402	8	8	4	7	4	6	6	9	6	6	2	4	4	6	6	1	5	5	5	6	2	4	5	7	5	5	NA	6	8	5	4	5	7	4	6	9	3	9	5	1	8	5	8	8
bG50d_C_p6	0.00183708	0.00156099	9.08837	9.32333	-0.23496	2	3	1	4	5	7	3	8	3	1	8	5	2	1	5	6	4	6	3	1	4	2	4	4	6	4	2	2	7	1	1	3	5	2	5	3	7	2	1	2	4	7	2	5
bG50d_C_p7	0.00242704	0.213673	8.68659	2.22652	6.46006	2	9	6	6	6	7	5	2	5	2	6	7	6	7	4	3	4	6	7	4	2	5	5	8	4	6	5	7	7	8	2	2	4	8	3	6	2	8	4	6	5	8	8	7
bG50d_C_p8	0.000403422	0.00156099	11.2754	9.32333	1.9521	1	8	3	7	3	4	5	7	4	3	7	4	1	5	3	4	6	4	2	7	4	7	7	2	4	5	2	3	4	7	1	6	6	1	7	8	8	5	1	5	2	7	8	4
bG50d_C_p9	0.00122545	0.0116575	9.67248	6.42259	3.24988	2	5	6	7	4	9	5	8	7	7	7	1	4	8	3	5	4	6	4	6	3	7	6	7	4	3	NA	3	6	4	4	9	9	4	2	7	8	3	2	4	7	7	7	3
bG50d_D_p1	0.00239449	0.00496262	8.70607	7.65468	1.05139	7	5	9	4	8	4	8	8	4	8	3	7	8	8	7	3	5	5	2	6	8	2	5	4	6	7	7	9	8	6	7	8	9	8	8	4	6	8	8	8	7	7	8	3
bG50d_D_p2	0.0148965	0.00496262	6.06888	7.65468	-1.5858	1	8	3	4	3	6	6	4	5	4	3	3	3	7	5	5	8	5	3	7	3	1	3	3	1	4	NA	6	7	3	1	6	6	3	2	2	8	2	7	4	6	3	8	4
bG50d_D_p3	0.0113639	0.00496262	6.4594	7.65468	-1.19528	2	1	1	3	6	4	6	1	3	3	3	1	4	2	6	2	2	3	4	7	2	3	3	1	4	3	NA	3	6	2	3	3	7	8	4	2	4	1	2	3	3	2	8	4
bG50d_D_p4	0.0465723	0.158125	4.42439	2.66087	1.76352	3	9	8	4	7	4	3	1	4	7	4	5	5	9	8	2	7	6	7	4	4	7	8	3	4	6	NA	8	7	2	7	9	9	5	6	5	8	7	3	6	5	6	7	6
bG50d_D_p5	0.000317346	0.00496262	11.6217	7.65468	3.96697	2	7	3	4	5	2	3	2	4	7	6	3	5	5	1	1	5	4	7	5	1	1	2	4	5	4	NA	1	8	4	1	7	8	8	6	3	1	3	3	2	3	2	3	5
bG50d_D_p6	0.880749	0.692997	0.183197	0.52908	-0.345883	5	2	8	6	2	5	9	7	6	6	7	5	7	3	8	2	9	5	7	7	9	6	7	7	6	8	NA	5	7	5	9	6	5	8	5	8	8	9	5	9	7	5	8	6
bG50d_D_p7	0.00816164	0.00496262	6.93692	7.65468	-0.717758	4	2	6	4	6	3	4	6	3	3	9	5	5	5	3	3	7	7	7	8	3	4	3	4	4	6	5	4	9	2	3	3	4	8	6	2	5	3	4	4	6	2	2	6
bG50d_D_p8	0.0121428	0.00496262	6.36376	7.65468	-1.29092	6	2	2	7	5	5	7	7	5	7	6	4	3	6	4	8	9	7	7	8	7	4	6	5	8	5	NA	6	8	8	3	7	9	9	8	8	1	7	8	4	9	5	7	5
bG50d_D_p9	0.00233154	0.00496262	8.7445	7.65468	1.08982	4	3	6	4	4	8	6	1	4	7	6	7	6	4	3	2	5	5	7	7	6	5	2	3	6	4	NA	5	8	2	1	5	7	8	5	4	2	3	7	4	4	2	5	4
bG50d_E_p1	0.00436897	0.146713	7.83849	2.76893	5.06956	1	1	5	4	8	4	1	1	1	3	1	1	2	4	1	1	1	5	2	4	1	2	2	2	5	8	1	1	5	1	1	7	6	2	6	1	2	2	1	1	2	2	2	4
bG50d_E_p2	0.000489324	0.000478699	10.9969	11.0286	-0.0316724	1	8	9	3	7	1	3	9	5	4	2	2	2	2	2	4	3	6	1	3	2	4	3	6	3	4	NA	2	8	1	1	6	2	6	8	2	4	4	4	2	3	3	1	4
bG50d_E_p3	0.00766142	0.257178	7.02817	1.95916	5.06901	3	1	6	3	2	3	4	3	3	1	4	2	7	3	2	2	4	5	2	4	2	4	2	3	3	3	2	2	8	2	2	5	2	7	2	2	2	2	2	3	4	2	4	2
bG50d_E_p4	0.0012338	0.000208802	9.66268	12.2256	-2.5629	1	6	2	5	4	4	2	3	3	1	2	5	3	1	4	3	7	5	3	4	3	1	2	5	2	2	2	2	7	1	1	5	8	4	2	3	3	2	2	2	4	3	7	2
bG50d_E_p5	0.000552237	0.227759	10.8224	2.13442	8.688	5	8	1	6	8	4	3	6	4	6	3	3	3	3	5	1	3	3	2	7	1	2	4	6	6	3	4	1	6	3	4	4	3	8	8	3	4	2	3	2	2	1	1	4
bG50d_E_p6	0.00635073	0.124279	7.29886	3.00835	4.29051	3	5	4	8	4	5	3	6	5	3	1	3	6	3	6	7	5	4	4	4	4	4	3	5	6	2	NA	2	8	7	7	5	7	1	6	2	7	3	2	4	5	3	5	3
bG50d_E_p7	0.0239454	0.00378995	5.38411	8.04361	-2.6595	2	1	4	6	5	2	6	9	6	3	3	4	4	6	3	3	4	5	2	2	6	2	2	3	6	2	NA	5	7	6	4	3	5	3	5	6	5	2	6	5	5	3	9	6
bG50d_E_p8	0.944028	0.184872	0.0830991	2.4354	-2.3523	3	9	8	6	4	6	7	9	9	7	6	3	7	7	2	8	5	5	7	7	8	7	7	7	6	4	NA	6	7	7	5	4	8	5	8	7	7	6	9	8	9	3	3	6
bG50d_E_p9	0.000269128	0.000208802	11.8594	12.2256	-0.366158	2	1	3	5	3	1	5	3	3	3	8	1	3	1	1	2	6	4	5	3	3	1	1	4	5	4	NA	2	8	3	2	6	2	2	5	3	2	3	1	2	3	4	7	2
bG50d_Ft_p1	0.00764138	0.146177	7.03195	2.77421	4.25774	1	8	3	3	4	5	2	1	3	3	1	3	7	4	1	1	2	6	3	4	1	6	1	2	6	8	4	1	4	1	1	7	3	8	9	2	9	2	1	4	1	4	8	3
bG50d_Ft_p2	0.00123459	0.000462236	9.66175	11.0791	-1.41733	1	3	9	7	7	6	1	6	5	6	3	7	2	1	3	4	2	4	2	5	4	1	6	2	6	4	NA	1	7	2	2	6	8	6	7	2	4	2	4	5	5	4	3	4
bG50d_Ft_p3	0.000555238	0.251664	10.8146	1.99043	8.82418	1	4	7	3	2	4	2	2	4	1	3	6	6	1	1	3	1	5	6	1	4	7	3	4	3	3	3	1	8	1	7	6	3	4	7	2	8	4	1	2	3	2	8	3
bG50d_Ft_p4	0.00633494	0.000200708	7.30245	12.2826	-4.98016	1	6	1	4	1	1	2	1	2	1	4	5	3	6	2	1	3	3	2	2	2	3	3	4	6	4	NA	1	5	1	1	2	7	1	4	1	3	5	1	3	4	3	7	1
bG50d_Ft_p5	0.0239458	0.227473	5.38408	2.13623	3.24785	7	9	5	4	4	4	4	5	4	4	2	8	2	5	1	2	1	7	2	7	2	3	5	4	2	4	NA	4	8	2	1	6	9	2	8	3	3	7	4	1	3	3	3	2
bG50d_Ft_p6	0.943901	0.121131	0.0832931	3.04536	-2.96206	7	3	2	7	4	5	5	6	3	3	2	7	2	1	2	4	4	5	3	7	3	2	3	4	8	3	4	5	8	2	3	7	8	7	5	1	4	3	6	7	5	2	7	2
bG50d_Ft_p7	0.000273047	0.00370129	11.8386	8.07776	3.76081	1	1	2	8	4	1	4	8	3	7	5	7	4	1	5	6	4	5	3	8	7	2	2	2	7	4	3	3	8	2	3	4	7	4	5	3	7	3	4	5	5	4	7	3
bG50d_Ft_p8	0.000471626	0.195437	11.0501	2.35523	8.69484	8	9	8	6	7	2	3	8	9	7	8	8	8	3	2	8	6	6	6	9	9	8	8	8	3	1	5	6	8	8	4	3	9	6	8	4	9	7	9	7	9	3	4	4
bG50d_Ft_p9	0.00015808	0.000200708	12.6271	12.2826	0.344445	3	3	4	7	2	1	4	3	4	4	4	3	7	2	2	2	3	4	6	7	2	2	2	2	2	1	3	1	7	3	2	6	5	1	4	2	7	1	2	5	5	4	9	3
bG50d_G_p1	0.0356205	0.0172211	4.81115	5.85968	-1.04853	8	3	5	8	6	7	7	7	8	6	6	6	5	7	2	4	6	4	8	9	5	3	2	3	7	5	NA	2	5	2	7	1	9	3	4	5	7	2	2	3	4	5	9	7
bG50d_G_p2	0.0295101	0.115388	5.08265	3.11543	1.96721	4	9	8	7	7	6	6	9	5	5	2	7	5	7	2	4	4	5	5	8	7	2	6	6	6	4	NA	8	6	7	5	6	9	4	4	3	5	3	3	6	5	7	9	7
bG50d_G_p3	0.00350876	0.00448074	8.15482	7.80205	0.352775	3	5	3	5	8	8	3	4	4	2	6	7	3	5	1	3	6	4	2	7	2	2	7	3	7	6	NA	3	8	2	1	8	7	8	2	3	2	2	3	4	5	4	9	7
bG50d_G_p4	0.0429201	0.161875	4.5422	2.62705	1.91516	8	3	7	4	7	7	8	4	5	7	4	7	5	6	3	9	5	3	5	9	5	3	8	7	7	4	NA	8	7	8	8	8	9	7	7	7	5	3	4	3	8	8	8	4
bG50d_G_p5	0.00269998	0.187233	8.53284	2.4171	6.11574	3	9	3	6	5	8	2	5	4	9	4	7	2	4	2	2	2	6	6	1	1	1	6	4	2	3	NA	3	7	2	2	4	8	6	6	3	3	1	2	1	1	5	8	3
bG50d_G_p6	0.841401	0.0147129	0.249135	6.08677	-5.83764	8	7	8	7	8	6	9	9	9	7	7	8	7	7	6	9	7	4	6	9	9	8	8	9	9	8	9	7	8	8	2	6	9	9	8	9	9	9	9	9	9	8	9	6
bG50d_G_p7	0.0119188	0.246715	6.39062	2.01908	4.37153	5	5	8	6	9	6	7	9	7	4	7	7	5	5	2	4	7	6	3	9	1	3	6	3	7	7	NA	2	5	7	1	7	7	6	4	3	2	1	2	2	3	7	9	6
bG50d_G_p8	0.00272641	0.00182207	8.51878	9.10021	-0.581428	3	5	3	6	6	7	7	5	3	8	5	4	5	8	2	3	8	3	8	7	3	2	7	3	6	6	NA	2	8	5	1	4	8	2	7	4	8	6	2	1	3	3	8	6
bG50d_G_p9	0.00504172	0.108363	7.63187	3.20605	4.42581	2	4	3	6	7	7	5	1	3	8	6	3	6	8	3	2	6	4	6	5	2	2	2	4	5	7	2	2	7	2	1	3	8	6	3	8	2	5	3	1	2	3	9	5
bG50d_H_p1	0.00305078	0.00227502	8.35661	8.77991	-0.4233	8	8	4	6	8	7	6	9	8	7	6	7	6	7	4	5	7	4	5	8	5	3	6	4	8	4	NA	3	9	5	5	8	9	8	4	7	7	3	5	6	5	6	7	6
bG50d_H_p2	0.0114694	0.0621832	6.44607	4.00733	2.43873	4	5	4	3	3	7	7	9	9	5	9	7	6	2	7	7	9	7	6	7	5	2	1	8	6	8	3	6	7	2	4	6	8	4	8	6	4	7	3	4	8	4	9	6
bG50d_H_p3	0.00547564	0.00227502	7.51276	8.77991	-1.26715	4	1	1	5	2	4	6	2	5	6	8	8	4	5	2	1	3	5	5	7	3	3	4	2	4	2	NA	1	6	1	1	4	8	4	7	1	5	1	2	2	3	7	2	5
bG50d_H_p4	0.0323522	0.28002	4.94999	1.8364	3.11359	7	5	7	4	1	6	7	9	9	6	9	8	6	5	2	8	4	5	8	8	5	3	6	7	9	6	NA	7	7	2	9	7	9	9	7	9	8	9	6	3	6	6	8	6
bG50d_H_p5	0.000269431	0.154283	11.8578	2.69635	9.16145	5	4	4	3	1	5	4	3	3	3	1	4	5	1	1	1	4	5	3	4	2	1	5	5	5	3	NA	1	7	5	1	6	4	8	4	3	3	1	3	1	4	3	7	4
bG50d_H_p6	0.903945	0.0246244	0.145693	5.34377	-5.19808	8	7	9	8	8	9	9	9	8	9	7	9	7	9	8	7	5	6	9	9	8	9	7	7	7	5	NA	8	9	8	8	4	9	9	7	9	7	8	9	8	9	8	9	6
bG50d_H_p7	0.00800827	0.205543	6.96429	2.28249	4.68181	7	1	2	4	2	4	8	6	4	2	9	7	7	4	2	2	7	6	5	7	2	3	5	2	3	6	1	2	7	8	1	5	9	2	8	7	2	1	2	2	4	6	8	6
bG50d_H_p8	0.00334508	0.00227502	8.22375	8.77991	-0.556163	7	4	4	3	7	4	6	9	5	3	6	7	7	6	5	5	7	6	5	8	2	2	6	4	7	7	NA	3	7	8	1	5	7	7	5	3	7	6	4	4	3	8	8	6
bG50d_H_p9	0.019689	0.0709973	5.66646	3.81609	1.85037	8	4	7	3	7	9	6	9	7	3	6	3	6	9	7	4	6	5	7	8	2	4	4	7	4	8	3	2	6	2	7	6	9	9	7	8	3	6	3	5	2	6	9	7
bG50d_I_p1	0.0302582	0.00521714	5.04653	7.58253	-2.53599	8	1	5	6	5	5	9	3	6	7	8	4	4	2	6	3	6	5	3	3	3	2	5	5	4	4	6	3	8	8	6	5	5	9	7	4	7	8	3	4	4	5	9	4
bG50d_I_p2	0.0533832	0.00521714	4.22747	7.58253	-3.35505	3	5	4	3	8	3	3	8	3	5	7	4	1	1	7	3	4	5	3	2	2	2	3	3	5	2	5	1	7	3	1	7	4	1	4	2	4	2	2	2	3	4	6	6
bG50d_I_p3	0.0370732	0.0918505	4.75348	3.44457	1.30891	6	9	7	4	4	7	6	7	5	4	9	8	8	8	8	6	7	7	7	8	6	5	5	5	7	6	NA	8	8	8	6	6	9	5	6	4	4	8	5	4	7	8	8	7
bG50d_I_p4	0.815848	0.0341861	0.293627	4.87045	-4.57682	7	9	7	5	7	8	7	8	8	7	4	7	8	5	2	8	9	4	8	9	8	9	6	8	6	4	8	6	5	8	8	6	6	9	8	9	9	9	9	8	7	4	6	6
bG50d_I_p5	0.0011834	0.00521714	9.72285	7.58253	2.14033	4	7	2	4	5	5	4	6	2	7	3	5	2	3	3	2	4	5	8	4	2	1	4	3	3	1	3	1	8	4	5	4	5	7	4	3	3	6	3	1	2	3	1	4
bG50d_I_p6	0.0244179	0.664728	5.35592	0.589163	4.76675	9	8	8	7	4	9	9	8	9	7	9	7	8	8	5	5	9	6	8	8	7	7	9	9	9	9	NA	9	7	8	7	9	9	7	8	7	8	9	7	4	8	4	8	4
bG50d_I_p7	0.00168989	0.00521714	9.20885	7.58253	1.62633	1	7	1	2	2	7	6	1	3	1	8	4	6	3	2	1	5	6	5	2	1	7	4	3	2	4	2	4	8	2	3	5	8	4	3	3	2	1	6	2	4	3	7	5
bG50d_I_p8	0.0127691	0.0341861	6.2912	4.87045	1.42075	5	3	4	5	7	8	8	8	7	7	6	8	5	7	3	7	8	6	8	8	6	8	9	7	6	4	NA	6	6	8	3	7	7	7	6	4	6	7	4	6	7	5	9	6
bG50d_I_p9	0.000564826	0.00521714	10.7899	7.58253	3.20738	2	5	2	3	7	6	3	7	2	4	7	4	4	3	2	8	8	4	6	5	1	4	3	2	3	4	NA	2	6	2	4	5	8	8	3	2	3	4	5	7	4	3	1	5
bG50d_J_p1	0.00997225	0.00250589	6.64787	8.64046	-1.99259	2	4	2	4	1	2	3	8	4	3	2	3	6	2	5	2	3	6	2	2	6	4	3	3	2	3	NA	4	5	7	1	6	3	5	8	2	7	3	3	6	4	1	2	6
bG50d_J_p2	0.0344742	0.066007	4.85834	3.92124	0.937102	2	2	4	4	7	5	4	4	4	3	3	8	7	3	6	2	8	5	7	4	5	2	4	6	6	5	3	2	6	3	6	6	3	3	4	2	8	4	1	3	5	5	5	5
bG50d_J_p3	0.0196876	0.0195317	5.66657	5.67804	-0.011469	4	2	2	4	3	4	4	5	7	3	6	6	5	2	4	2	4	3	8	6	3	1	2	4	6	3	2	2	7	2	1	8	5	8	6	3	4	4	4	8	4	4	4	4
bG50d_J_p4	0.0429775	0.108368	4.54028	3.20599	1.33429	3	3	3	4	2	5	9	8	2	4	4	5	7	4	6	2	7	5	4	6	3	2	4	2	3	4	NA	4	8	6	2	5	5	1	3	2	2	3	5	4	4	5	3	6
bG50d_J_p5	0.01014	0.298317	6.62379	1.74508	4.87871	9	3	5	4	8	4	8	3	3	3	3	8	7	7	4	3	6	3	8	3	2	2	3	5	7	3	5	7	6	3	2	4	9	2	8	3	2	6	3	3	6	3	5	4
bG50d_J_p6	0.746418	0.000301011	0.421945	11.6979	-11.276	8	4	7	6	3	7	4	4	4	4	5	5	8	7	4	3	7	6	4	3	3	2	2	2	7	4	7	5	4	2	2	6	3	7	5	2	7	2	2	5	5	3	1	4
bG50d_J_p7	0.0452205	0.159196	4.46688	2.65112	1.81576	6	2	4	3	3	6	7	7	4	5	4	9	7	5	3	6	7	3	6	4	7	8	5	3	6	5	NA	3	7	5	7	4	8	7	8	4	7	3	2	9	4	5	2	4
bG50d_J_p8	0.00971476	0.00705297	6.68561	7.14755	-0.461948	7	8	5	3	6	3	6	8	3	6	7	8	8	7	3	7	7	4	7	6	5	7	5	5	7	3	NA	3	8	4	1	6	6	8	3	2	8	2	3	8	7	5	8	5
bG50d_J_p9	0.0323367	0.116059	4.95068	3.10707	1.84361	6	7	6	3	8	4	7	3	4	4	8	7	8	6	5	8	7	3	7	8	7	7	6	9	9	5	7	4	7	6	3	7	8	9	8	6	3	4	5	6	7	4	3	4
bG50d_K_p1	0.00994029	0.00208276	6.6525	8.90729	-2.25479	4	4	1	4	4	8	4	6	3	6	3	3	6	1	3	2	2	3	1	3	4	2	2	4	3	3	2	2	4	3	1	5	1	1	5	2	5	1	7	4	3	2	6	4
bG50d_K_p2	0.0344386	0.0619111	4.85983	4.01366	0.846172	2	3	5	4	2	2	6	3	6	4	4	8	8	7	2	9	5	6	6	8	2	3	2	4	3	5	3	5	8	7	1	6	5	4	6	2	8	5	5	4	4	4	3	5
bG50d_K_p3	0.0196655	0.0181463	5.66819	5.78418	-0.115994	7	3	1	3	2	4	9	7	3	3	6	7	2	4	2	5	8	4	5	6	4	2	2	4	3	3	NA	2	7	2	1	3	9	3	6	2	3	4	2	7	5	3	5	4
bG50d_K_p4	0.0430419	0.115086	4.53811	3.11922	1.4189	2	9	9	4	2	3	5	6	3	7	5	5	8	8	4	5	3	5	4	3	3	5	2	5	5	3	NA	6	7	8	2	5	8	5	6	2	6	4	4	2	4	5	2	6
bG50d_K_p5	0.0101328	0.29029	6.62482	1.78443	4.84039	6	1	5	4	4	4	3	5	5	7	1	4	5	3	2	3	6	5	3	5	2	2	2	5	7	4	5	8	8	7	1	6	2	6	5	2	4	8	2	2	3	4	4	2
bG50d_K_p6	0.746406	0.000277541	0.421967	11.815	-11.393	1	4	6	4	1	3	5	3	2	2	2	5	7	2	5	3	7	6	6	3	6	3	2	4	3	6	5	3	8	7	1	3	6	9	3	3	7	4	2	3	5	2	4	4
bG50d_K_p7	0.0452887	0.169574	4.46471	2.56002	1.90469	5	1	5	5	8	7	5	7	4	4	7	7	7	3	5	5	4	4	5	8	4	3	4	7	3	5	NA	8	7	6	4	5	6	8	5	3	6	4	5	3	5	6	9	4
bG50d_K_p8	0.00968358	0.00590962	6.69024	7.40272	-0.712475	4	8	4	4	7	5	4	4	4	4	7	3	3	2	8	8	6	3	7	4	3	6	7	6	3	5	4	4	5	8	3	6	9	5	5	2	6	5	4	6	5	4	2	4
bG50d_K_p9	0.0323838	0.123319	4.94859	3.01953	1.92906	7	6	6	4	1	1	8	5	3	4	5	7	8	5	6	7	6	5	8	6	3	9	4	6	2	5	NA	6	7	6	1	4	7	5	7	7	8	5	5	5	5	4	8	7
bG50d_L_p1	0.00996352	0.00233506	6.64913	8.74232	-2.0932	3	7	2	3	3	1	3	2	3	3	1	7	3	1	2	2	7	2	7	3	4	3	1	5	3	2	3	2	7	5	1	5	7	6	6	1	8	1	2	3	4	3	5	2
bG50d_L_p2	0.0344211	0.0566813	4.86056	4.14098	0.719578	1	6	2	7	2	4	4	3	5	7	8	4	3	2	2	7	5	5	4	8	4	3	3	7	4	3	NA	3	7	8	1	6	7	4	7	1	9	3	4	4	4	4	3	4
bG50d_L_p3	0.0196632	0.0172903	5.66836	5.8539	-0.185542	2	1	2	4	3	5	6	6	5	2	6	2	1	2	8	2	6	4	6	5	3	7	4	6	3	4	2	2	7	7	1	3	4	8	3	1	5	3	4	7	5	5	5	3
bG50d_L_p4	0.0432055	0.127145	4.53264	2.97545	1.55719	2	6	7	6	8	4	8	8	4	8	8	8	5	2	3	4	6	4	6	6	5	2	3	4	8	2	NA	4	7	7	3	6	8	6	4	2	8	4	3	2	6	4	2	3
bG50d_L_p5	0.0101564	0.277156	6.62147	1.85123	4.77024	4	5	4	7	3	4	4	2	4	7	4	2	3	8	4	2	3	4	7	4	2	7	5	3	5	3	NA	3	8	5	1	6	9	5	6	3	2	4	1	2	2	3	2	5
bG50d_L_p6	0.745902	0.000332251	0.422942	11.5554	-11.1325	2	7	5	6	2	6	6	3	8	5	1	7	5	8	2	6	7	5	5	7	6	2	3	2	8	3	NA	3	8	8	1	5	8	6	6	2	4	4	2	1	6	4	3	4
bG50d_L_p7	0.0454592	0.184995	4.45928	2.43444	2.02484	1	4	5	4	4	4	5	3	4	5	8	8	8	2	4	5	3	4	9	9	6	4	6	8	3	7	7	7	8	7	2	6	8	8	7	3	3	6	6	6	7	5	6	4
bG50d_L_p8	0.00970639	0.00640445	6.68685	7.28671	-0.599859	6	8	5	4	7	4	5	6	4	7	3	7	8	5	4	4	6	4	7	7	3	7	3	7	3	3	NA	3	6	7	2	4	7	6	4	4	8	5	4	6	6	4	7	4
bG50d_L_p9	0.0323687	0.110399	4.94926	3.1792	1.77006	3	7	4	2	4	1	8	1	4	5	8	6	7	6	4	2	5	6	9	7	5	4	5	5	6	6	3	3	6	5	2	4	9	9	4	3	3	2	3	6	5	6	9	6
gB50d_A_p1	0.0751895	0.000794665	3.73332	10.2974	-6.56404	9	7	4	7	7	1	9	7	8	4	3	2	8	7	7	9	6	8	8	7	8	9	7	9	7	8	8	9	8	7	7	8	5	7	8	9	4	9	7	9	8	5	3	4
gB50d_A_p2	0.0316873	0.000794665	4.97995	10.2974	-5.31741	7	4	3	2	4	5	6	1	1	3	1	2	4	1	2	4	2	3	5	1	2	1	2	2	1	5	NA	2	7	1	1	5	2	4	3	4	7	1	3	1	3	2	5	3
gB50d_A_p3	0.141634	0.014145	2.81976	6.14356	-3.3238	6	7	7	3	8	5	8	3	5	3	5	5	9	8	3	5	9	7	8	6	6	7	6	8	8	9	NA	8	8	7	1	6	7	9	8	7	3	9	8	7	6	6	5	7
gB50d_A_p4	0.082302	0.00524477	3.60293	7.57491	-3.97198	4	6	3	2	3	3	3	1	2	4	3	3	5	2	2	3	4	5	5	3	1	2	1	4	1	7	4	4	8	2	2	6	1	7	2	3	6	2	2	1	3	4	3	3
gB50d_A_p5	0.0112719	0.000794665	6.47112	10.2974	-3.82625	9	8	3	8	3	7	8	8	8	8	8	5	8	2	4	3	7	7	9	6	3	3	5	6	7	7	NA	7	6	3	6	7	9	9	7	7	4	9	5	6	3	5	2	2
gB50d_A_p6	0.17822	0.944207	2.48827	0.0828245	2.40545	7	4	7	3	3	1	6	4	3	8	6	2	4	9	7	5	9	9	8	8	5	2	4	6	6	7	2	9	8	2	5	8	8	8	8	3	3	4	3	9	3	7	1	7
gB50d_A_p7	0.0291403	0.000794665	5.10084	10.2974	-5.19653	5	8	6	5	7	7	9	8	9	8	6	7	5	9	6	7	8	5	8	6	8	7	7	7	6	8	9	9	6	5	7	3	2	6	4	7	7	8	6	5	9	4	3	7
gB50d_A_p8	0.190355	0.00969492	2.39323	6.68855	-4.29532	4	6	9	7	7	8	4	7	4	8	7	3	4	9	5	8	9	7	8	6	9	9	8	8	7	9	NA	8	8	8	8	7	7	9	8	9	9	9	9	6	7	6	8	6
gB50d_A_p9	0.00982789	0.000794665	6.6689	10.2974	-3.62846	6	9	1	2	2	7	2	1	1	6	4	3	2	1	3	1	1	3	1	2	3	2	2	3	1	6	NA	2	8	2	3	8	1	1	4	2	2	3	1	1	1	2	2	2
gB50d_B_p1	0.132319	0.00322839	2.9179	8.27497	-5.35706	7	6	3	7	7	7	5	2	8	5	8	3	4	4	3	3	2	5	7	6	6	4	3	5	7	4	5	5	7	5	1	6	4	8	7	4	3	2	6	4	4	4	9	6
gB50d_B_p2	0.0295065	0.00322839	5.08282	8.27497	-3.19214	4	7	2	4	4	4	7	5	5	8	7	4	7	4	4	2	4	4	3	3	2	3	2	3	2	3	6	2	8	3	2	4	7	4	4	3	6	2	1	2	5	3	4	6
gB50d_B_p3	0.0869261	0.057191	3.52407	4.12807	-0.604	3	4	2	4	7	6	5	9	4	7	6	7	3	4	5	2	7	6	3	7	7	6	4	5	3	6	NA	9	7	7	3	5	8	6	5	4	3	5	6	3	4	2	9	4
gB50d_B_p4	0.288911	0.0751496	1.7913	3.73409	-1.94279	4	7	9	4	3	4	4	8	8	4	4	7	6	6	6	7	9	3	4	5	5	4	4	4	2	7	4	9	8	3	3	3	5	7	4	3	8	3	5	1	5	4	9	7
gB50d_B_p5	0.00761993	0.00322839	7.03601	8.27497	-1.23896	2	8	2	5	3	2	5	2	4	8	4	2	7	3	8	1	2	5	7	4	2	2	5	3	3	3	NA	2	8	3	1	4	1	3	3	4	2	1	1	3	3	3	6	8
gB50d_B_p6	0.134301	0.684103	2.89646	0.547716	2.34874	8	9	8	8	9	7	7	9	8	6	7	7	8	9	4	9	9	8	9	9	9	9	9	4	9	9	NA	8	8	8	9	6	9	8	8	9	7	9	9	9	9	6	9	7
gB50d_B_p7	0.0151396	0.00322839	6.04553	8.27497	-2.22944	3	8	1	3	7	2	5	3	4	2	5	7	6	2	2	1	7	4	5	4	2	2	3	2	5	4	NA	2	6	2	2	5	6	8	2	2	1	1	4	1	4	4	9	6
gB50d_B_p8	0.212166	0.0751496	2.23674	3.73409	-1.49736	6	9	2	6	9	6	4	7	6	6	9	4	6	3	4	4	8	6	8	5	6	3	6	7	3	7	5	8	4	7	2	6	9	9	4	8	7	7	3	7	6	5	8	5
gB50d_B_p9	0.00370733	0.00322839	8.0754	8.27497	-0.199566	2	6	1	3	3	5	6	4	8	3	2	5	5	7	4	3	5	4	9	9	2	3	4	1	2	2	NA	1	7	1	1	6	4	9	3	3	8	2	5	2	2	3	9	7
gB50d_C_p1	0.0889924	0.000794662	3.49017	10.2974	-6.8072	3	9	8	7	8	2	3	8	5	6	7	5	6	8	3	6	6	6	8	8	4	6	5	5	9	8	5	7	7	6	6	3	9	9	7	4	6	8	7	7	7	7	6	4
gB50d_C_p2	0.028724	0.000794662	5.1216	10.2974	-5.17577	7	5	2	3	8	1	4	2	4	2	4	3	3	2	2	2	3	4	1	5	2	1	2	2	6	7	3	2	7	2	1	3	4	3	2	2	4	1	1	3	4	3	2	3
gB50d_C_p3	0.070528	0.014145	3.82566	6.14357	-2.31791	1	7	4	4	2	4	3	7	4	4	7	7	3	2	3	1	7	6	4	4	7	2	3	4	7	6	NA	7	7	8	3	4	4	4	5	8	6	7	8	7	6	4	8	3
gB50d_C_p4	0.100166	0.00524476	3.31953	7.57491	-4.25538	1	4	5	2	4	4	3	1	4	1	5	4	6	7	2	1	4	5	2	7	2	1	4	8	7	3	3	7	8	2	2	1	8	1	3	3	6	1	2	2	4	6	8	4
gB50d_C_p5	0.00742678	0.000794662	7.07305	10.2974	-3.22432	2	6	4	4	9	4	3	7	8	5	2	4	3	4	3	1	6	7	7	3	2	2	3	3	6	6	NA	3	3	3	3	5	3	1	7	3	9	7	5	3	2	2	7	2
gB50d_C_p6	0.396187	0.944214	1.33575	0.0828135	1.25293	7	7	9	6	6	1	5	6	5	3	9	4	9	8	5	3	9	8	9	9	6	9	6	8	8	9	7	9	8	5	5	4	5	9	9	3	6	9	7	9	7	7	4	7
gB50d_C_p7	0.0257407	0.000794662	5.2798	10.2974	-5.01757	1	8	6	3	7	8	2	5	6	1	9	3	7	2	2	2	6	4	4	8	7	2	4	5	7	4	NA	4	8	6	3	2	3	1	4	3	7	2	4	4	7	6	2	6
gB50d_C_p8	0.0659687	0.00969486	3.92208	6.68856	-2.76649	2	9	8	4	4	6	6	7	3	7	9	3	7	8	7	4	9	6	7	7	8	8	4	6	7	8	8	7	8	8	9	3	9	7	5	8	7	8	7	7	7	5	1	7
gB50d_C_p9	0.00620703	0.000794662	7.33188	10.2974	-2.96549	4	9	4	4	7	3	2	7	5	1	8	7	6	7	2	1	3	5	8	3	4	2	4	5	5	7	NA	4	8	3	3	3	9	1	4	5	7	2	5	6	5	3	9	4
gB50d_D_p1	0.0760446	0.000794661	3.71701	10.2974	-6.58036	5	9	7	4	2	2	3	7	5	7	3	2	9	7	3	6	6	7	8	6	5	8	3	6	6	7	NA	7	7	2	4	3	5	1	8	3	3	5	8	6	8	9	5	4
gB50d_D_p2	0.0213789	0.000794661	5.54767	10.2974	-4.7497	2	7	1	5	3	5	4	4	6	1	4	3	5	2	2	2	3	3	3	6	2	3	3	5	3	3	2	2	6	1	3	3	8	6	3	4	3	1	5	6	6	4	5	4
gB50d_D_p3	0.0585792	0.0141449	4.09347	6.14357	-2.0501	6	5	6	4	6	1	4	1	4	7	6	3	4	1	2	2	3	6	5	3	6	8	3	4	8	5	5	8	7	7	1	3	5	8	4	2	7	3	5	5	5	3	8	5
gB50d_D_p4	0.0868383	0.00524476	3.52553	7.57491	-4.04938	2	8	3	4	3	3	6	3	6	4	6	2	9	7	4	1	6	3	5	7	3	8	4	8	9	5	NA	7	6	2	1	5	6	1	3	4	8	7	7	2	4	7	3	8
gB50d_D_p5	0.00468598	0.000794661	7.73744	10.2974	-2.55994	7	7	3	5	6	3	5	4	5	2	2	3	6	3	3	2	9	5	5	6	2	1	3	4	5	3	NA	4	7	2	2	4	3	1	6	3	3	7	4	4	2	6	9	8
gB50d_D_p6	0.352195	0.944214	1.50555	0.0828135	1.42274	6	7	8	4	6	1	6	6	6	3	8	4	4	9	7	6	6	8	9	9	4	8	3	7	7	7	5	9	7	3	5	4	5	3	8	6	8	6	4	6	5	6	6	5
gB50d_D_p7	0.0189036	0.000794661	5.72519	10.2974	-4.57218	2	9	6	3	2	1	3	4	5	5	6	3	3	4	2	2	4	5	7	6	6	3	4	3	8	4	6	3	9	2	4	3	2	2	3	2	8	2	5	6	5	3	8	6
gB50d_D_p8	0.054347	0.00969485	4.20166	6.68857	-2.48691	6	4	8	4	2	8	3	7	5	4	6	4	8	5	7	7	7	6	8	8	6	6	6	7	7	8	6	6	7	6	7	1	8	2	8	5	2	6	9	8	6	5	8	4
gB50d_D_p9	0.0038315	0.000794661	8.02788	10.2974	-2.2695	1	3	6	5	5	3	3	4	4	2	3	2	8	7	3	5	4	2	8	6	3	4	3	7	4	6	NA	3	6	2	4	6	7	4	2	4	7	6	7	5	5	3	9	5
gB50d_E_p1	0.0407693	0.000794662	4.61637	10.2974	-5.681	3	3	4	3	4	6	9	1	4	3	6	4	6	1	4	3	5	5	8	8	5	5	5	6	7	4	2	8	8	7	8	9	6	3	5	8	9	5	7	4	5	4	5	4
gB50d_E_p2	0.0192994	0.000794662	5.6953	10.2974	-4.60207	6	3	8	3	3	6	8	8	7	6	4	4	9	3	3	5	4	5	6	8	8	3	3	6	4	5	2	8	7	7	6	5	8	4	4	4	6	8	6	7	7	4	4	4
gB50d_E_p3	0.0389291	0.014145	4.68301	6.14357	-1.46056	3	1	7	7	3	4	9	6	6	7	5	5	9	6	2	5	9	7	3	7	6	8	7	7	9	8	NA	8	7	5	4	7	5	3	7	7	8	9	6	5	7	6	7	7
gB50d_E_p4	0.078761	0.00524476	3.66637	7.57491	-3.90853	6	6	1	3	1	7	5	1	4	4	7	2	5	2	1	2	3	5	3	4	4	2	2	4	2	3	NA	3	7	1	1	6	3	2	2	4	7	1	4	5	4	4	8	4
gB50d_E_p5	0.00420869	0.000794662	7.89241	10.2974	-2.40496	4	7	5	4	2	1	4	3	4	8	3	5	5	5	6	1	5	6	8	4	2	6	5	6	5	3	NA	9	4	3	7	8	9	5	7	4	3	5	5	2	5	5	9	4
gB50d_E_p6	0.567462	0.944213	0.817404	0.0828159	0.734588	7	6	8	8	6	5	9	9	8	8	7	6	4	9	6	6	9	8	9	9	7	9	7	5	7	6	NA	9	7	9	8	6	5	6	6	9	4	8	8	8	8	6	6	6
gB50d_E_p7	0.017988	0.000794663	5.79682	10.2974	-4.50055	2	4	9	6	2	7	7	3	6	7	9	6	8	2	8	3	7	3	8	7	5	8	3	6	4	5	3	6	8	7	7	7	9	6	4	7	3	8	7	7	8	7	8	5
gB50d_E_p8	0.113145	0.00969486	3.14376	6.68856	-3.54481	4	5	7	5	4	5	2	5	4	6	9	3	6	5	6	6	6	5	7	4	7	7	4	7	5	6	3	6	8	2	6	7	8	6	7	7	7	4	7	7	5	9	3	5
gB50d_E_p9	0.00343892	0.000794662	8.18383	10.2974	-2.11354	7	3	3	7	1	4	5	2	4	3	6	4	3	1	5	1	8	4	4	2	4	3	2	4	3	4	NA	1	7	8	7	4	3	1	5	4	7	3	2	5	2	3	8	3
gB50d_Ft_p1	0.0981301	0.000794662	3.34916	10.2974	-6.94821	8	5	7	3	6	4	6	8	4	5	4	7	9	8	8	5	9	8	7	8	7	7	5	8	8	9	7	7	8	5	5	1	7	4	9	7	8	8	7	6	5	6	1	4
gB50d_Ft_p2	0.120051	0.000794662	3.05828	10.2974	-7.2391	6	5	5	3	3	8	6	7	4	1	6	4	6	4	4	2	8	5	8	8	5	6	5	5	5	4	NA	7	5	7	7	4	9	1	6	3	8	2	5	4	8	5	1	6
gB50d_Ft_p3	0.00932474	0.014145	6.74472	6.14357	0.601153	8	4	7	4	7	5	7	2	8	7	4	8	9	9	7	8	9	5	7	8	7	8	5	8	7	6	7	9	7	7	8	9	9	7	4	6	6	9	8	4	7	8	1	6
gB50d_Ft_p4	0.252402	0.00524476	1.9862	7.57491	-5.5887	9	7	3	3	3	3	8	5	2	6	7	8	7	3	3	8	4	3	3	7	4	2	7	6	7	8	4	3	6	2	6	5	7	1	8	8	9	1	5	4	7	3	3	5
gB50d_Ft_p5	0.031543	0.000794662	4.98654	10.2974	-5.31084	9	3	5	2	1	8	3	7	7	7	5	8	6	5	7	6	8	6	5	8	6	7	7	3	5	4	6	7	4	4	7	4	8	1	7	8	9	8	5	5	5	5	2	8
gB50d_Ft_p6	0.111726	0.944213	3.16197	0.0828159	3.07915	9	9	7	6	8	4	7	5	3	6	5	7	9	9	8	8	9	9	9	7	6	7	9	8	9	7	6	8	3	6	9	3	7	9	9	7	7	9	7	3	5	5	9	7
gB50d_Ft_p7	0.00779597	0.000794662	7.00306	10.2974	-3.29432	3	5	6	2	4	2	4	6	4	7	6	3	1	2	4	2	7	6	7	2	5	2	3	3	8	4	2	5	7	6	6	6	3	7	7	4	5	2	6	5	2	2	2	5
gB50d_Ft_p8	0.0851815	0.00969486	3.55332	6.68856	-3.13525	9	6	6	4	4	6	9	7	6	2	8	7	7	8	6	4	8	8	8	9	7	8	7	6	7	9	NA	7	3	7	7	6	9	1	8	7	9	8	7	6	6	5	2	5
gB50d_Ft_p9	0.0100725	0.000794662	6.63344	10.2974	-3.66393	6	2	2	3	3	5	2	3	4	3	1	3	7	3	4	2	8	5	5	6	3	1	2	5	3	6	3	6	6	2	8	8	2	6	7	4	2	1	5	5	2	6	2	4
gB50d_G_p1	0.0153855	4.32019e-05	6.02229	14.4985	-8.47626	5	3	2	5	4	3	2	1	2	4	4	3	5	1	4	1	7	8	8	1	6	2	5	7	7	4	5	3	7	3	1	4	9	9	8	1	6	5	4	3	4	2	1	5
gB50d_G_p2	0.064881	0.0572703	3.94606	4.12607	-0.180009	8	4	8	7	4	5	9	8	9	2	4	8	9	7	5	4	8	7	7	7	5	8	7	6	8	8	NA	8	7	8	9	8	9	9	8	9	5	8	6	6	5	6	2	3
gB50d_G_p3	0.0433096	0.00708084	4.52917	7.14186	-2.6127	3	2	3	3	7	1	3	3	2	1	1	8	2	4	1	5	6	4	2	2	3	2	4	5	7	6	NA	2	7	3	5	8	3	3	3	2	5	2	7	5	6	3	4	4
gB50d_G_p4	0.267776	0.869382	1.9009	0.201938	1.69896	6	9	9	7	9	4	9	7	9	7	9	8	9	8	6	7	9	7	9	9	8	6	9	7	7	5	NA	9	7	8	7	9	9	5	8	8	9	9	7	9	9	6	3	6
gB50d_G_p5	0.0140032	0.0331862	6.1581	4.91327	1.24483	9	3	4	5	7	5	9	5	5	7	9	2	8	8	5	2	9	8	8	8	3	9	9	9	8	9	3	9	7	7	7	9	9	9	8	8	3	9	3	5	5	7	4	7
gB50d_G_p6	0.0283991	0.000115203	5.13801	13.0835	-7.94552	1	4	3	4	5	6	1	1	2	2	1	5	4	2	1	1	7	5	7	4	1	3	4	3	3	4	4	2	8	2	1	8	4	1	4	1	7	1	4	4	3	2	1	7
gB50d_G_p7	0.0902074	0.0163501	3.47061	5.93456	-2.46395	7	9	6	6	8	8	9	8	9	9	8	7	9	7	4	4	8	7	8	7	7	8	8	8	7	6	NA	8	7	7	8	2	6	9	8	5	8	9	7	8	6	5	8	8
gB50d_G_p8	0.0287705	0.000295202	5.11927	11.726	-6.60674	7	7	6	3	3	7	7	3	2	4	6	6	6	4	4	1	6	7	6	5	7	7	6	5	4	6	5	7	5	2	7	6	9	8	7	4	7	2	7	5	6	5	8	6
gB50d_G_p9	0.0362992	0.00286139	4.78392	8.44907	-3.66515	7	3	7	6	4	5	7	7	2	8	5	7	7	6	5	6	9	7	4	8	6	8	7	7	7	7	3	7	6	8	9	2	9	9	8	5	4	8	3	5	6	6	6	7
gB50d_Ht_p1	0.0264242	9.15658e-05	5.242	13.4148	-8.17283	2	8	3	7	7	4	6	4	5	3	2	7	3	1	8	7	5	4	3	4	7	2	5	6	2	3	NA	4	7	8	3	5	8	8	9	6	8	5	5	6	6	5	8	4
gB50d_Ht_p2	0.10981	0.0399878	3.18692	4.6443	-1.45738	8	9	7	6	7	1	9	4	9	3	6	8	9	3	2	7	7	7	3	8	5	7	8	8	7	5	6	7	5	8	5	6	9	8	6	2	7	7	6	7	6	6	9	6
gB50d_Ht_p3	0.0496209	0.0149663	4.33291	6.06213	-1.72923	2	2	5	4	6	7	9	4	4	4	1	7	4	1	2	8	9	7	7	9	6	2	7	7	9	5	4	5	8	8	3	1	7	8	6	5	8	3	6	6	6	4	2	7
gB50d_Ht_p4	0.354904	0.800552	1.4945	0.320933	1.17356	9	9	8	6	7	4	9	9	6	9	4	8	9	8	7	7	9	3	8	8	8	9	9	8	7	7	5	9	4	8	9	6	9	3	8	9	7	9	9	8	7	6	3	9
gB50d_Ht_p5	0.00961118	0.0866593	6.70107	3.5285	3.17257	9	2	5	4	7	4	5	4	4	6	5	8	4	6	6	2	9	8	8	8	2	1	5	4	3	4	5	8	6	5	7	5	9	9	8	7	2	9	5	2	3	5	7	6
gB50d_Ht_p6	0.0269185	0.000243832	5.21526	12.0018	-6.78656	6	5	3	3	8	4	8	3	1	2	5	4	3	5	2	5	7	7	7	8	6	7	5	3	2	6	NA	7	7	7	3	4	5	5	3	3	8	2	5	5	5	7	9	7
gB50d_Ht_p7	0.102595	0.0345719	3.28496	4.85425	-1.56929	8	9	4	6	8	4	7	3	5	6	7	5	8	4	4	5	9	7	7	8	8	8	9	9	9	8	NA	7	3	7	5	6	9	9	8	4	4	9	6	3	7	4	6	8
gB50d_Ht_p8	0.028305	0.000624614	5.1428	10.6447	-5.50195	8	8	6	4	7	2	9	8	9	8	8	7	7	7	8	8	7	4	4	7	8	5	5	4	4	6	8	6	7	7	5	5	9	8	3	7	8	7	8	6	7	8	8	7
gB50d_Ht_p9	0.0366462	0.00604977	4.77019	7.3689	-2.59871	8	5	4	7	9	7	8	9	9	5	8	7	7	3	4	7	7	5	4	8	7	8	7	6	8	7	NA	6	8	8	8	2	7	9	6	8	8	8	6	4	6	6	3	7
gB50d_I_p1	0.0378715	0.00131493	4.72274	9.5708	-4.84806	8	6	7	7	9	4	9	8	4	3	7	3	7	4	2	2	2	7	6	5	3	7	5	8	4	8	7	7	6	7	2	6	5	2	8	5	8	6	7	9	4	3	9	4
gB50d_I_p2	0.0698411	0.00131493	3.83978	9.5708	-5.73102	7	6	8	8	8	8	9	8	5	3	9	2	4	8	7	5	8	7	9	8	7	5	7	4	7	7	8	5	8	8	6	5	8	4	5	3	9	7	8	7	7	3	2	4
gB50d_I_p3	0.0673758	0.00131493	3.89163	9.5708	-5.67917	4	2	3	4	7	6	4	1	3	5	6	2	6	2	7	4	4	7	6	6	7	4	5	9	7	8	6	6	3	7	5	4	4	6	3	2	5	2	4	5	5	2	1	3
gB50d_I_p4	0.240056	0.0420776	2.05855	4.5708	-2.51225	8	7	8	4	3	4	5	4	3	2	6	5	7	4	2	3	5	7	3	8	3	5	7	7	9	5	4	6	3	2	5	6	3	1	3	7	7	3	2	6	5	4	9	8
gB50d_I_p5	0.00174538	0.00131493	9.16225	9.5708	-0.408554	8	3	4	7	7	4	6	8	8	8	7	8	4	9	6	2	8	4	7	4	2	3	8	3	4	2	NA	9	2	3	1	5	8	7	8	4	3	3	6	2	5	4	4	6
gB50d_I_p6	0.116127	0.918472	3.10622	0.122693	2.98353	9	8	8	7	6	6	9	8	8	6	5	8	8	7	6	6	9	8	9	8	7	8	7	8	6	8	7	9	8	8	8	4	8	9	8	8	8	9	8	8	6	5	9	7
gB50d_I_p7	0.0167897	0.00131493	5.89628	9.5708	-3.67452	7	1	1	3	1	1	1	3	4	5	4	5	3	1	2	7	2	6	4	2	2	3	2	4	3	2	NA	2	5	1	2	5	3	2	3	3	7	1	4	2	2	1	7	4
gB50d_I_p8	0.179697	0.00131493	2.47636	9.5708	-7.09444	9	2	7	7	3	9	4	7	9	7	8	9	7	7	3	5	7	6	9	8	6	7	7	7	3	7	NA	7	4	7	2	2	9	7	4	8	4	9	7	8	8	4	7	5
gB50d_I_p9	0.0112779	0.00131493	6.47036	9.5708	-3.10044	5	4	6	3	3	1	5	8	8	3	9	3	6	7	3	6	9	4	6	6	2	7	4	5	2	3	6	2	7	6	2	5	4	2	6	5	7	7	6	2	3	4	5	5
gB50d_J_p1	0.0133179	9.14003e-05	6.23049	13.4174	-7.18695	3	4	3	5	2	6	3	9	5	2	9	4	4	2	2	4	2	3	7	7	4	2	3	4	3	3	5	5	7	7	3	6	8	3	7	8	6	2	7	4	6	4	4	6
gB50d_J_p2	0.0994967	0.0399778	3.32921	4.64466	-1.31545	8	4	8	5	4	5	6	9	7	6	8	8	8	3	3	6	6	6	5	9	6	8	8	7	8	7	NA	6	8	8	7	5	8	9	8	8	9	5	7	8	7	7	5	5
gB50d_J_p3	0.0603272	0.0149683	4.05105	6.06194	-2.01089	1	6	3	4	1	2	3	6	3	6	9	5	5	2	2	4	9	3	9	9	5	3	3	4	8	3	NA	4	8	5	2	6	6	8	4	2	4	4	2	4	4	4	8	6
gB50d_J_p4	0.328635	0.800669	1.60544	0.320723	1.28472	5	9	9	7	3	4	9	9	8	7	8	8	8	6	4	5	9	4	8	9	8	9	9	8	8	7	8	9	8	8	8	8	9	9	7	9	5	9	8	8	7	7	4	8
gB50d_J_p5	0.0093749	0.0866972	6.73698	3.52787	3.20911	7	1	4	6	4	8	4	8	5	7	6	8	6	7	2	3	8	3	8	7	2	3	7	6	5	3	5	8	6	3	2	5	9	9	6	7	2	8	7	5	3	4	7	4
gB50d_J_p6	0.0307876	0.000243691	5.0215	12.0027	-6.98115	8	7	2	4	3	2	4	2	5	3	9	5	9	3	3	4	9	3	4	8	4	2	4	3	3	5	4	3	8	8	2	5	8	8	4	5	8	6	3	5	7	5	5	7
gB50d_J_p7	0.0826267	0.0345582	3.59725	4.85483	-1.25758	1	7	6	4	7	8	4	9	8	7	7	2	6	6	3	3	9	6	7	8	6	9	8	7	7	8	NA	8	4	8	8	8	9	8	8	9	6	9	8	3	7	6	9	6
gB50d_J_p8	0.0325563	0.000624354	4.94092	10.6453	-5.70443	6	6	4	4	4	7	4	8	5	7	7	6	4	2	3	5	7	4	2	9	3	7	7	5	2	7	NA	6	8	7	6	4	8	6	4	6	3	7	6	7	7	5	8	6
gB50d_J_p9	0.0430819	0.00604963	4.53677	7.36894	-2.83216	6	8	8	5	8	5	8	9	6	9	8	7	7	7	2	6	7	5	5	8	7	8	7	5	3	6	NA	8	7	8	6	5	9	7	7	7	9	7	5	6	8	9	8	6
gB50d_K_p1	0.00960923	0.000794735	6.70136	10.2972	-3.59587	9	5	6	7	9	6	9	8	8	4	8	8	8	8	7	5	9	9	8	7	6	8	7	8	7	6	NA	9	3	7	3	7	2	4	7	7	7	9	7	5	8	4	9	6
gB50d_K_p2	0.0086245	0.000794735	6.85734	10.2972	-3.43989	9	3	2	2	5	2	5	1	3	5	5	1	6	2	5	3	3	4	5	3	4	4	3	2	2	2	3	3	3	2	4	3	5	8	2	5	7	1	6	2	6	2	2	3
gB50d_K_p3	0.0870027	0.014146	3.5228	6.14346	-2.62066	9	9	9	4	8	4	6	5	8	7	7	3	8	8	2	4	9	7	7	7	6	9	6	7	5	4	7	9	6	7	7	1	3	9	8	8	9	9	5	5	8	4	9	8
gB50d_K_p4	0.00971852	0.00524483	6.68505	7.57489	-0.88984	4	4	1	2	3	4	3	1	4	3	8	2	5	3	1	6	5	3	3	5	4	1	3	4	5	2	5	1	6	5	1	7	2	9	4	5	4	3	4	5	5	3	1	4
gB50d_K_p5	0.00757824	0.000794735	7.04392	10.2972	-3.25332	8	4	4	8	8	8	7	5	8	6	7	7	6	8	4	4	9	9	9	7	3	9	7	7	6	8	NA	9	3	8	9	6	9	9	8	9	2	8	7	5	5	6	5	6
gB50d_K_p6	0.68912	0.944203	0.537174	0.0828315	0.454342	9	1	9	8	7	3	7	9	3	7	7	3	8	9	6	5	8	8	9	9	7	9	8	6	8	7	7	8	8	3	5	6	4	9	8	5	9	8	7	5	7	5	3	6
gB50d_K_p7	0.00853454	0.000794735	6.87247	10.2972	-3.42477	7	1	1	3	4	7	3	1	4	3	4	2	7	2	4	1	6	7	5	4	6	4	2	5	3	7	NA	3	3	5	3	7	2	7	5	2	3	7	4	5	3	3	1	4
gB50d_K_p8	0.00933808	0.00969474	6.74266	6.68858	0.0540753	9	3	7	7	6	6	9	8	9	3	9	1	9	7	8	7	9	9	9	8	6	9	7	6	6	5	NA	9	8	8	9	6	9	5	6	8	4	8	7	8	7	6	2	7
gB50d_K_p9	0.00744935	0.000794735	7.06867	10.2972	-3.22857	1	2	3	2	2	4	4	8	4	5	9	2	4	2	7	3	6	3	6	2	3	2	3	6	1	7	3	3	7	7	6	7	9	7	5	1	7	2	2	2	5	3	1	3
gB50d_L_p1	0.0808976	0.0031575	3.62776	8.307	-4.67924	2	1	6	3	6	3	6	4	4	2	1	5	3	1	2	3	5	3	8	7	4	2	4	5	5	3	NA	7	6	2	6	2	8	9	5	2	3	6	5	3	5	4	7	3
gB50d_L_p2	0.278302	0.0031575	1.84528	8.307	-6.46172	1	6	4	4	9	7	3	8	5	5	7	8	2	2	4	9	7	5	4	8	7	8	6	9	4	2	NA	7	4	2	8	3	9	5	8	4	9	9	8	7	7	5	6	5
gB50d_L_p3	0.0634375	0.0559627	3.97852	4.15939	-0.180871	1	8	5	6	7	5	2	3	3	6	3	6	3	2	4	3	6	2	2	4	5	2	4	5	3	3	NA	6	6	2	1	7	9	8	5	8	7	3	1	4	5	4	7	6
gB50d_L_p4	0.137741	0.0207809	2.85997	5.5886	-2.72862	4	9	3	6	6	4	2	8	4	5	3	7	4	3	3	5	7	3	5	9	5	2	3	7	3	2	5	6	7	2	2	9	9	5	6	5	3	2	4	6	5	4	4	5
gB50d_L_p5	0.0080563	0.0031575	6.95567	8.307	-1.35134	5	7	9	6	9	4	3	9	5	7	2	8	5	3	3	4	9	4	7	7	5	2	5	5	6	3	NA	9	6	2	8	6	1	4	7	7	7	7	5	3	6	7	6	5
gB50d_L_p6	0.201757	0.778052	2.30931	0.362061	1.94725	2	7	4	4	4	2	3	6	5	6	4	7	4	3	3	8	6	3	7	9	4	1	8	6	2	5	NA	6	6	5	2	4	8	1	5	8	2	2	4	7	4	5	9	4
gB50d_L_p7	0.0154119	0.0031575	6.01981	8.307	-2.28719	1	2	3	3	4	3	2	1	4	5	2	3	3	1	2	1	4	4	3	5	5	2	3	6	4	3	NA	5	5	2	1	6	8	6	3	4	4	1	4	3	6	5	6	3
gB50d_L_p8	0.0528909	0.0383781	4.24084	4.70357	-0.462737	3	1	3	4	6	7	8	4	5	3	6	7	6	3	3	3	6	3	7	7	4	2	4	6	3	3	5	7	4	2	1	3	7	8	4	4	3	4	6	8	6	4	9	2
gB50d_L_p9	0.00675291	0.0031575	7.21027	8.307	-1.09673	1	9	6	3	8	4	3	7	4	3	7	7	4	3	2	3	3	3	6	6	5	5	5	6	3	2	NA	9	8	2	8	2	8	7	9	4	6	4	4	3	6	4	7	5
[truncated: 22 more columns]
