# Supplementary material for: "If You Have to Ask, You'll Never Know": Effects of Specialised Stylistic Expertise on Predictive Processing of Music
Source: PLoS One. 2016 Oct 12;11(10):e0163584. doi: 10.1371/journal.pone.0163584 (PMC5061385; doi:10.1371/journal.pone.0163584)
Supplement: S2 Table — (XLSX) [file pone.0163584.s002.xlsx]

## Sheet: by.subject
Participant_ID	Expertise	Gender	Age	Occupational_status	Musical_genre	Obtained_qualification	Expected_qualification	Professional	Instrument	Yrs_formal_music_training	Yrs_daily_music_practice	Hrs_daily_practice_at_peak_of_interest	Gold-MSI_09_F1_(Importance)	Gold-MSI_09_F2_(Perception&Production)	Gold-MSI_09_F3_(MusicalTraining)	Gold-MSI_09_F4_(Emotions)	Gold-MSI_09_F5_(Body)	Gold-MSI_09_F6_(Creativity)	Gold-MSI_09_F7_(Openness)	Gold-MSI_10_F1_(ActiveEngagement)	Gold-MSI_10_F2_(PerceptualAbilities)	Gold-MSI_10_F3_(MusicalTraining)	Gold-MSI_10_F4_(Emotions)	Gold-MSI_10_F5_(SingingAbilities)	Gold-MSI_10_FG_(GeneralSophistication)	Gold-MSI_Genre_prs	Gold-MSI_Genre_rnd	Gold-MSI_Melody_acc	Gold-MSI_Melody_dpr	Gold-MSI_Melody_tpr	Gold-MSI_Melody_fpr	Gold-MSI_Melody_auc	Jazz_concerts_attended	Jazz_concerts_performed	Jazz_course_yes_no	Jazz_collection	Jazz_songs_singorplay	InfUnc_Bfit_1_32	InfUnc_Gfit_1_32	InfUnc_Bfit_2_32	InfUnc_Gfit_2_32	InfUnc_Bfit_2_9	InfUnc_Gfit_2_9	InfUnc_Bfit_1_32	InfUnc_Gfit_1_32	InfUnc_Bfit_2_32	InfUnc_Gfit_2_32	InfUnc_Bfit_2_9	InfUnc_Gfit_2_9
cc01	1	1	30	5	3	5	NA	1	piano	10+	10+	3-4	86	104	55	53	38	54	32	48	57	43	39	40	106	12	0.375	0.846154	2.40615	0.75	0.0416667	0.9375	30	0	yes	70	0	0.322235	-0.230896	0.336014	-0.254431	0.326352	-0.290556	0.309167	-0.216486	0.338198	-0.236413	0.34505	-0.275529
cc03	1	2	27	5	3	5	NA	1	classical_guitar	10+	6-9	5+	80	103	54	49	40	48	34	44	55	44	38	34	96	18	0.6875	0.615385	1.41303	0.375	0.0416667	0.875	20	0	no	50	2	0.397511	-0.308881	0.44409	-0.290158	0.503995	-0.307811	0.411678	-0.433825	0.417921	-0.416945	0.434222	-0.447077
cc04	1	1	24	5	3	5	NA	1	violin	10+	10+	3-4	79	91	56	48	32	43	38	44	49	43	35	33	95	9	0.21875	0.769231	2.0503	0.625	0.0416667	1	15	0	yes	50	0	0.267126	-0.209381	0.377828	-0.224002	0.377531	-0.182333	0.605246	-0.398141	0.651228	-0.428283	0.667069	-0.445095
cc05	1	2	28	2	3	5	NA	1	piano	10+	10+	5+	79	91	56	45	37	35	36	43	50	43	33	25	85	12	0.375	0.769231	2.0503	0.625	0.0416667	0.85	10	0	no	50	0	-0.177215	0.231677	-0.0659933	0.269111	0.00989116	0.28246	-0.0786597	0.122828	-0.0453281	0.172012	-0.0338004	0.194044
cc06	1	1	22	2	3	4	NA	1	violin	10+	10+	3-4	68	103	52	42	32	49	33	39	57	46	32	38	100	12	0.375	0.846154	1.99197	0.875	0.2	0.7625	10	0	no	30	2	0.238014	-0.290243	0.187851	-0.23226	0.15517	-0.237965	0.28987	-0.293371	0.251866	-0.244407	0.219464	-0.21036
cc07	1	1	29	5	2	5	NA	1	flute	10+	10+	5+	96	99	58	55	44	53	39	54	59	45	41	42	111	12	0.375	0.846154	2.40615	0.75	0.0416667	0.9375	50	1	no	0	0	-0.218292	0.342638	-0.212678	0.339413	-0.205105	0.247961	-0.222779	0.414721	-0.175604	0.391323	-0.169327	0.350505
cc08	1	1	31	5	3	5	NA	1	piano	10+	10+	3-4	75	105	51	48	40	39	35	45	59	43	36	31	92	8	0.166667	0.923077	2.88201	0.875	0.0416667	0.9375	200	0	no	50	0	-0.18576	0.260906	-0.201462	0.268012	-0.157047	0.225422	-0.258088	0.274888	-0.259846	0.289063	-0.240889	0.269894
cc17	1	1	42	3	3	4	NA	1	violin	10+	10+	5+	67	105	53	49	40	43	27	32	58	41	36	35	95	13	0.427083	0.769231	1.51611	0.75	0.2	0.8875	4	20	no	100	0	0.102813	0.050966	0.190973	0.0887472	0.249495	0.0989047	0.124029	-0.00794275	0.170078	0.0186231	0.197604	0.0121364
cc21	1	2	42	5	1	4	NA	1	double_bass	10+	10+	5+	80	99	58	47	38	45	31	44	53	45	35	32	99	8	0.166667	0.769231	2.0503	0.625	0.0416667	0.9	10	0	no	30	3	-0.022889	0.0860611	-0.0706117	0.0933091	-0.00663341	0.0412357	-0.0265621	0.0757167	-0.0785011	0.102933	-0.0182884	0.0541593
cc22	1	2	30	5	3	5	NA	1	violin	10+	10+	3-4	96	100	59	56	49	60	42	60	51	45	42	46	119	16	0.583333	0.846154	2.40615	0.75	0.0416667	0.95	10	3	yes	50	4	0.124658	0.0908748	0.160538	0.00310032	0.18609	-0.0870427	0.128209	0.150467	0.214659	0.0518842	0.264187	-0.00650333
cc28	1	1	20	2	1	6	5	1	harp	10+	10+	3-4	97	103	54	54	40	38	38	54	58	42	40	30	103	16	0.583333	0.846154	2.40615	0.75	0.0416667	0.975	2	0	no	4	8	0.294738	-0.357637	0.200512	-0.320202	0.197193	-0.378851	0.310606	-0.324512	0.261147	-0.298673	0.288271	-0.320835
cc30	1	1	28	5	3	5	NA	1	cello	10+	10+	5+	76	97	59	50	42	43	39	45	52	45	37	34	100	12	0.375	0.769231	2.0503	0.625	0.0416667	0.8875	10	0	no	10	0	0.0813749	0.0390569	0.199964	0.0266479	0.288808	0.0314714	0.258373	-0.14266	0.278479	-0.176466	0.288179	-0.160515
cc31	1	1	19	2	1	6	5	1	piano	10+	10+	3-4	98	110	57	55	36	55	42	59	62	44	41	41	113	24	1	0.692308	1.16026	0.625	0.2	0.7125	5	0	no	50	4	0.363497	-0.130544	0.360862	-0.263136	0.334542	-0.279504	0.330582	-0.102335	0.360989	-0.22301	0.360037	-0.248918
cc32	1	1	23	2	3	4	NA	1	violin	10+	10+	5+	91	111	58	51	45	56	40	54	62	44	38	42	108	13	0.427083	0.692308	0.927837	0.75	0.4	0.7875	15	0	yes	0	0	0.0545887	0.15573	0.0792467	0.107165	0.11296	0.0343106	0.0773015	0.145465	0.104497	0.105217	0.12171	0.0564484
cc33	1	2	28	5	3	5	NA	1	horn	10+	10+	3-4	68	109	59	48	34	48	34	41	60	45	37	37	102	8	0.166667	0.923077	2.88201	0.875	0.0416667	0.925	2	5	no	100	20	0.316594	-0.16064	0.399551	-0.111762	0.440476	-0.144578	0.294607	-0.202686	0.36485	-0.13552	0.393547	-0.18669
cc34	1	1	56	5	3	4	NA	1	piccolo	10+	10+	3-4	77	97	59	48	29	41	29	33	52	45	40	35	98	9	0.21875	0.692308	1.73166	0.5	0.0416667	0.8875	5	0	no	50	50	0.341092	-0.284677	0.370407	-0.25984	0.349075	-0.238677	0.370827	-0.247923	0.424409	-0.22798	0.450039	-0.217306
cc36	1	1	24	3	1	4	NA	1	cello	3-5	10+	1.2	81	93	44	46	47	46	30	42	54	38	37	38	89	13	0.427083	0.769231	1.51611	0.75	0.2	0.8375	4	0	no	3	4	0.0831455	-0.0318565	0.117968	0.00921219	0.0745896	-0.0103149	0.140571	0.00408089	0.189013	0.0326621	0.17641	0.00959686
cc38	1	1	29	4	3	5	NA	1	violin	10+	10+	5+	93	111	63	56	49	62	42	60	62	49	42	48	125	9	0.21875	0.615385	0.841621	0.5	0.2	0.7375	7	3	no	4	6	-0.464039	0.452339	-0.395029	0.481005	-0.316392	0.452567	-0.403505	0.408355	-0.412041	0.417981	-0.409336	0.42165
cc41	1	2	24	2	3	5	NA	1	violin	10+	10+	5+	95	107	59	48	45	48	40	55	61	45	34	41	112	18	0.6875	0.692308	1.73166	0.5	0.0416667	0.75	4	0	no	4	0	0.326218	-0.170928	0.344603	-0.210939	0.331867	-0.268579	0.346521	-0.133725	0.39743	-0.187355	0.409928	-0.225176
cc42	1	1	31	5	3	5	NA	1	cello	10+	10+	5+	77	96	58	48	43	54	37	52	54	45	36	42	108	16	0.583333	0.615385	0.571986	0.625	0.4	0.65	10	1	no	50	2	0.210387	-0.0783461	0.207	-0.0939782	0.218081	-0.0949811	0.252643	-0.113129	0.233441	-0.10226	0.244816	-0.110271
cj01	2	2	34	5	2	5	NA	1	saxophone	10+	4-5	3-4	79	99	59	47	35	50	34	53	51	45	35	36	107	16	0.583333	0.846154	2.40615	0.75	0.0416667	0.95	500	1000	yes	5000	300	0.554841	-0.374905	0.569279	-0.407616	0.535857	-0.399093	0.542837	-0.358077	0.586014	-0.367416	0.61769	-0.425157
cj02	2	2	39	5	2	5	NA	1	trumpet	10+	10+	3-4	66	112	57	48	38	57	33	38	63	43	38	43	108	16	0.583333	0.846154	2.40615	0.75	0.0416667	1	150	1000	yes	10000	300	0.182891	-0.156618	0.179205	-0.148503	0.216226	-0.156024	0.165776	-0.162349	0.168927	-0.150871	0.203942	-0.149002
cj07	2	2	59	5	2	5	NA	1	piano	10+	10+	2	77	104	55	48	28	51	36	46	58	41	36	38	99	12	0.375	1	3.46333	0.958333	0.0416667	1	300	200	no	1000	NA	0.386976	-0.269081	0.399057	-0.23127	0.406281	-0.261078	0.412198	-0.306152	0.395872	-0.272069	0.40072	-0.326706
cj11	2	2	28	5	2	5	NA	1	guitar	10+	10+	5+	86	108	56	53	40	57	36	52	59	46	39	43	112	16	0.583333	0.692308	1.16026	0.625	0.2	0.7	900	500	yes	100000	150	0.54628	-0.464568	0.538412	-0.507086	0.517965	-0.480208	0.583113	-0.479221	0.573798	-0.508076	0.607633	-0.53914
cj13	2	2	33	4	2	4	NA	1	piano	10+	10+	5+	92	97	58	52	38	50	29	48	54	46	38	38	111	18	0.6875	0.692308	0.927837	0.75	0.4	0.7	100	500	yes	5000	2000	-0.0514312	0.0486002	-0.0308075	0.0168072	0.0158752	0.000483627	0.0278295	0.0222816	0.0142159	-0.0166623	0.0683569	-0.0523946
cj14	2	2	26	5	2	4	NA	1	double_bass	10+	10+	5+	94	89	63	48	47	55	39	55	46	49	36	41	112	16	0.583333	0.923077	2.88201	0.875	0.0416667	0.975	1000	800	yes	1000	100	0.395156	-0.260428	0.511629	-0.330308	0.530501	-0.346516	0.489019	-0.322636	0.585902	-0.37241	0.624424	-0.426037
cj18	2	2	28	5	2	4	NA	1	saxophone	10+	10+	2	91	101	61	43	44	59	36	54	54	47	32	45	114	18	0.6875	0.923077	2.88201	0.875	0.0416667	0.9375	1000	500	yes	8000	100	0.327167	-0.378342	0.284365	-0.352269	0.257764	-0.359866	0.336887	-0.3982	0.29696	-0.364286	0.266989	-0.358219
cj20	2	2	30	5	2	5	NA	1	double_bass	10+	10+	5+	97	112	61	53	47	63	40	58	63	47	39	49	122	13	0.427083	0.846154	2.40615	0.75	0.0416667	0.875	500	1000	yes	10000	100	0.500965	-0.380042	0.582441	-0.389244	0.57889	-0.396019	0.646926	-0.470598	0.690774	-0.459282	0.712678	-0.520974
cj21	2	1	44	5	2	3	NA	1	voice	10+	10+	5+	83	99	47	47	49	56	35	48	55	35	31	43	97	12	0.375	0.923077	2.57329	0.958333	0.2	0.9375	100	100	yes	70	200	-0.447569	0.412487	-0.320515	0.426302	-0.241243	0.409313	-0.402307	0.34028	-0.34814	0.348207	-0.360016	0.364927
cj23	2	2	69	5	2	5	NA	1	piano	3-5	10+	2	63	90	47	33	32	48	28	33	45	35	23	36	86	12	0.375	0.769231	2.0503	0.625	0.0416667	0.8	1500	5000	no	5000	500	0.421102	-0.20285	0.491476	-0.199039	0.46906	-0.23944	0.432252	-0.161359	0.531888	-0.160462	0.548631	-0.206368
cj25	2	2	23	5	2	4	NA	1	trombone	10+	10+	5+	94	109	58	51	34	49	41	53	61	44	37	35	104	10	0.270833	0.846154	2.40615	0.75	0.0416667	0.975	200	100	yes	4000	20	0.472983	-0.577094	0.459669	-0.558534	0.413791	-0.514595	0.555269	-0.592108	0.552102	-0.600052	0.545308	-0.559093
cj27	2	1	26	5	2	4	NA	1	voice	6-9	10+	2	98	103	45	54	45	49	38	54	60	32	39	36	99	18	0.6875	0.769231	2.0503	0.625	0.0416667	0.6625	500	80	yes	100	30	-0.31961	0.315461	-0.274806	0.290009	-0.214263	0.261155	-0.332306	0.291199	-0.30116	0.248766	-0.288589	0.254186
cj28	2	1	54	5	2	4	NA	1	piano	10+	10+	3-4	85	110	53	52	33	43	31	45	61	39	38	29	90	15	0.53125	0.769231	2.0503	0.625	0.0416667	0.875	900	500	yes	900	990	-0.297983	0.334784	-0.261664	0.370579	-0.231901	0.358138	-0.183609	0.276975	-0.217122	0.304023	-0.24377	0.315937
cj30	2	2	21	2	2	5	NA	1	percussion	10+	10+	5+	93	103	56	47	43	54	38	57	57	43	33	40	108	15	0.53125	0.769231	1.51611	0.75	0.2	0.7375	200	80	yes	500	100	-0.213414	0.347058	-0.193949	0.345212	-0.222627	0.304223	-0.277373	0.447903	-0.193054	0.44748	-0.213084	0.448831
cj31	2	2	36	5	2	5	NA	1	piano	10+	10+	5+	89	103	59	54	40	48	33	52	55	45	39	34	104	18	0.6875	0.923077	2.88201	0.875	0.0416667	0.975	200	500	yes	2990	553	-0.171852	0.282589	-0.109741	0.265125	-0.135056	0.267681	-0.142265	0.297075	-0.0844717	0.279081	-0.101526	0.27042
cj32	2	2	34	5	2	4	NA	1	piano	6-9	10+	3-4	79	87	53	41	26	43	32	47	45	39	30	30	93	16	0.583333	1	3.46333	0.958333	0.0416667	1	50	400	yes	3000	NA	0.287481	-0.284675	0.260657	-0.243976	0.309728	-0.232307	0.304943	-0.325852	0.246414	-0.279562	0.295673	-0.294432
cj33	2	2	28	5	2	4	NA	1	electric_bass	10+	10+	5+	99	106	50	53	44	57	39	57	60	42	39	43	109	18	0.6875	NA	NA	NA	NA	NA	1000	500	yes	600	80	0.401385	-0.404715	0.426899	-0.38391	0.411888	-0.31359	0.421211	-0.437799	0.433375	-0.421858	0.444656	-0.395596
cj34	2	2	31	5	2	5	NA	1	bass_guitar	10+	10+	5+	99	108	61	53	43	59	40	60	59	47	39	45	122	13	0.427083	1	3.46333	0.958333	0.0416667	1	100	100	yes	3000	200	-0.0173538	-0.0082511	0.065686	0.00540395	0.0557252	0.0563278	0.0297233	0.0162118	0.12104	0.0181936	0.141014	0.0605408
cj37	2	2	27	5	2	5	NA	1	piano	10+	10+	5+	101	110	60	51	48	57	35	57	62	46	38	43	117	18	0.6875	0.769231	2.0503	0.625	0.0416667	1	200	200	yes	2000	200	0.654462	-0.556772	0.669891	-0.583685	0.634453	-0.624745	0.734568	-0.540978	0.771047	-0.57982	0.780955	-0.616439
cj38	2	2	30	5	2	5	NA	1	saxophone	3-5	10+	5+	86	103	56	48	40	57	40	53	55	42	36	43	110	13	0.427083	1	3.46333	0.958333	0.0416667	1	500	800	yes	5000	50	0.445191	-0.448617	0.45261	-0.493476	0.430591	-0.482225	0.53223	-0.441622	0.552888	-0.490501	0.583531	-0.491208
cj39	2	1	34	5	2	5	NA	1	saxophone	10+	10+	5+	79	104	54	49	38	54	41	51	57	46	36	40	109	18	0.6875	0.923077	2.88201	0.875	0.0416667	0.9875	500	350	yes	2500	10	0.423734	-0.289011	0.462251	-0.317893	0.466086	-0.347555	0.436873	-0.260986	0.502388	-0.289046	0.53975	-0.314942
cj40	2	2	45	5	2	5	NA	1	saxophone	6-9	10+	3-4	78	95	49	41	32	42	34	53	51	35	28	30	88	18	0.6875	0.769231	2.0503	0.625	0.0416667	1	500	500	yes	1200	100	-0.106214	0.289509	-0.122287	0.331903	-0.106948	0.38416	-0.314942	0.38705	-0.352398	0.436908	-0.344199	0.426295
cn02	0	1	50	2	1	5	NA	2	none	0	0	0	64	49	16	47	22	23	29	33	28	12	31	19	50	6	0.0625	0.461538	-0.253347	0.5	0.6	0.4625	20	0	no	20	0	-0.259678	0.392877	-0.213054	0.385121	-0.118662	0.356993	-0.248451	0.313192	-0.297351	0.3189	-0.291741	0.293258
cn04	0	2	24	2	1	6	5	2	none	0	0	0	68	63	11	43	31	23	25	37	34	9	29	20	45	15	0.53125	0.769231	1.51611	0.75	0.2	0.875	0	0	no	20	0	0.0271648	0.157418	0.0547823	0.117888	0.100674	0.0435971	0.0753407	0.13718	0.0986149	0.0798195	0.111046	0.0534018
cn08	0	2	27	2	3	6	5	2	voice	0	1	1.5	63	80	15	39	35	39	25	35	43	12	27	34	71	8	0.166667	0.846154	2.40615	0.75	0.0416667	0.9875	0	0	no	14	0	-0.0231695	0.0435448	0.0896919	0.114549	0.130044	0.111326	0.21064	-0.0921884	0.23777	-0.0292855	0.249603	-0.0876401
cn09	0	1	46	2	3	5	NA	2	none	0	0	0	36	65	11	36	26	16	28	18	36	7	27	13	34	13	0.427083	0.615385	0.421143	0.75	0.6	0.65	5	0	no	0	0	0.151018	-0.0772274	0.187419	-0.0558508	0.25668	-0.11038	0.330235	-0.266602	0.272219	-0.259071	0.251893	-0.279522
cn10	0	2	30	2	1	5	NA	2	none	0	0	0	65	92	17	41	39	35	26	27	51	12	30	29	64	13	0.427083	0.692308	1.16026	0.625	0.2	0.7625	0	0	no	20	0	-0.0169669	0.0746032	0.0439344	0.0771089	0.100693	0.063882	0.127322	-0.08554	0.0886257	-0.0936438	0.0556635	-0.0847342
cn11	0	2	27	2	1	5	NA	2	drums	0	0	0	38	49	9	29	21	24	18	18	28	7	19	18	38	6	0.0625	0.538462	0.253347	0.5	0.4	0.5625	0	0	no	0	0	-0.0627432	0.0375862	-0.0845418	0.0703191	-0.0873955	0.024652	-0.00831014	0.0257178	-0.0337305	0.0495547	-0.0513398	0.0368826
cn13	0	2	25	2	1	5	NA	2	recorder	0	0	0	84	64	10	52	37	15	36	48	39	7	37	13	49	16	0.583333	0.538462	0.0652923	0.625	0.6	0.5625	9	0	no	20	0	0.0598165	0.0585026	0.0850832	0.0992702	0.129827	0.111139	0.0944025	-0.0330899	0.0554148	-0.00164514	0.0384428	0.0134621
cn16	0	1	28	3	2	5	NA	2	none	0	0	0	66	78	17	41	32	38	29	30	44	11	29	30	64	9	0.21875	0.692308	0.927837	0.75	0.4	0.7125	1	0	no	20	3	-0.116742	0.16462	-0.0195255	0.209389	0.0110914	0.212857	-0.0502727	0.0924492	-0.0068159	0.126764	-0.0244547	0.132979
cn17	0	1	26	2	1	6	5	2	voice	0	0	0	68	75	16	44	33	33	35	45	42	11	32	26	63	18	0.6875	0.769231	1.4037	0.875	0.4	0.7375	8	0	no	50	1	-0.00531138	0.15249	0.103938	0.120714	0.123624	0.191725	-0.0425412	0.16643	0.0470618	0.126726	0.081266	0.129404
cn18	0	2	26	2	1	5	NA	2	none	0	0	0	81	85	18	39	41	44	32	40	52	13	28	36	74	8	0.166667	0.769231	1.4037	0.875	0.4	0.8	2	0	no	5	0	-0.147182	0.249153	-0.0722303	0.280194	-0.0490233	0.23179	-0.0981598	0.243163	-0.0348175	0.238427	-0.0526126	0.231325
cn19	0	1	35	2	1	5	NA	2	voice	0	0	0	46	61	18	40	38	15	26	20	34	11	28	12	36	16	0.583333	0.692308	0.927837	0.75	0.4	0.75	2	0	no	0	0	0.244596	-0.099563	0.323373	-0.0764319	0.368533	-0.121945	0.395864	-0.248246	0.400358	-0.254185	0.377533	-0.293674
cn23	0	1	43	7	1	4	NA	2	none	0	0	0	63	78	11	51	42	34	30	30	43	9	37	28	58	15	0.53125	0.615385	0.571986	0.625	0.4	0.75	0	0	no	0	0	0.00137006	0.18894	0.0903299	0.175219	0.172423	0.133407	0.0983592	0.107276	0.137428	0.0746662	0.159683	0.0674413
cn24	0	2	35	5	1	4	NA	2	voice	0	0	0	58	81	16	36	25	40	20	26	42	11	27	31	58	7	0.114583	0.538462	0.253347	0.5	0.4	0.6875	0	0	no	0	0	-0.382294	0.453768	-0.329506	0.47819	-0.269222	0.466831	-0.374468	0.42212	-0.387567	0.42692	-0.391921	0.419945
cn27	0	1	38	4	2	3	NA	2	none	0	0	0	91	73	9	48	44	33	39	54	39	7	29	28	62	18	0.6875	0.692308	0.897002	0.875	0.6	0.5625	3	0	no	10	0	0.333877	-0.232333	0.388871	-0.306765	0.428389	-0.339688	0.397115	-0.258452	0.431776	-0.339728	0.480804	-0.382573
cn28	0	2	40	5	1	4	NA	2	none	0	0	0	73	95	9	49	40	26	27	35	52	7	35	20	57	12	0.375	0.692308	0.927837	0.75	0.4	0.85	3	0	no	10	0	0.3984	-0.285699	0.359111	-0.275916	0.36096	-0.338433	0.380099	-0.30365	0.336829	-0.274312	0.344446	-0.356668
cn29	0	2	53	8	1	3	NA	2	Voice	0	0	0.5	64	80	13	41	38	33	32	31	49	11	29	25	57	9	0.21875	0.692308	0.927837	0.75	0.4	0.775	0	0	no	0	0	-0.173203	0.364286	-0.129427	0.394244	-0.134623	0.383702	-0.239407	0.380056	-0.195846	0.398204	-0.238293	0.398377
cn33	0	2	25	5	1	4	NA	2	piano	2	1	1	74	64	22	43	34	32	33	41	36	18	30	23	59	12	0.375	0.538462	0.253347	0.5	0.4	0.6875	5	0	no	10	0	-0.122335	0.30105	0.0448557	0.29292	0.14722	0.292113	0.00278265	0.19991	0.058317	0.147896	0.0360449	0.132174
cn36	0	1	19	7	1	3	NA	2	drums_voice	0	0	0	74	69	15	52	41	32	28	45	43	10	36	25	60	12	0.375	0.615385	0.571986	0.625	0.4	0.75	0	0	no	0	0	0.0347712	0.0499506	0.108113	0.0300384	0.145199	0.0222948	0.0772355	-0.0465706	0.100009	-0.0491466	0.0869109	-0.0608597
cn37	0	2	20	2	1	6	5	2	voice	0	0	0	84	108	25	49	49	49	35	46	62	18	36	43	94	16	0.583333	0.538462	0.253347	0.5	0.4	0.5875	1	0	no	0	0	-0.386258	0.326069	-0.305056	0.344291	-0.194779	0.29706	-0.275193	0.242981	-0.302572	0.24316	-0.263201	0.216309
cn38	0	2	23	7	1	4	NA	2	voice	0	0	0	65	81	11	38	43	29	26	31	44	8	27	23	52	12	0.375	0.615385	0.571986	0.625	0.4	0.7125	2	0	2	0	0	-0.290478	0.444849	-0.240501	0.401461	-0.192721	0.453373	-0.396925	0.419251	-0.400352	0.399202	-0.410692	0.420385
																																					Classical	0.12279	-0.027189	0.151582	-0.0287493	0.173547	-0.055343	0.163032	-0.0510107	0.184344	-0.0547806	0.199445	-0.074292
																																					Jazz	0.198872	-0.137522	0.22908	-0.140703	0.231757	-0.141445	0.227221	-0.144498	0.251239	-0.147714	0.265035	-0.160662
																																					Non	-0.0367674	0.138244	0.0242831	0.143798	0.0714466	0.124315	0.0227834	0.0707694	0.0302686	0.0664611	0.027454	0.0499837
																																					All	0.0983167	-0.0129738	0.138017	-0.0128145	0.161266	-0.027941	0.140567	-0.0448998	0.158379	-0.0486468	0.167238	-0.0648506









[truncated: 49 more columns]

## Sheet: by.context
stim.name	cand.name	group	melody.id	note.id	melody.name	syncopation	tempo.presentation	swing.ratio	nPVI	no.events	distinct.pitches	keysig	pM	cpitch.preprobe	avg.B.IC.run2_32	avg.G.IC.run2_32	avg.Diff.IC.run2_32	avg.B.H.run2_32	avg.G.H.run2_32	avg.Diff.H.run2_32	preprobe.B.IC.run2_32	preprobe.G.IC.run2_32	preprobe.Diff.IC.run2_32	preprobe.B.H.run2_32	preprobe.G.H.run2_32	preprobe.Diff.H.run2_32	B.H.run1_32	G.H.run1_32	Diff.H.run1_32	B.H.run2_32	G.H.run2_32	Diff.H.run2_32	B.H.run2_9	G.H.run2_9	Diff.H.run2_9	InfUnc.context	cc01	cc03	cc04	cc05	cc06	cc07	cc08	cc17	cc21	cc22	cc28	cc30	cc31
bG_A	Bg_17	1	23	333	Constell	0	162	2.2393	4.21	20	12	0	68	63	2.4227	5.1994	-2.7767	2.577	2.582	-0.0049	0.1675	7.0224	-6.8548	0.8774	2.2608	-1.3834	0.6267	2.4535	-1.8268	0.6819	2.9756	-2.2937	0.2987	2.3996	-2.1009	InfUnc_bG50d_A	0.949252	0.918356	0.941584	0.991451	0.962781	0.945238	0.974148	0.953712	0.975226	0.90474	0.946184	0.981458	0.957598
bG_Bt	Bg_21t	1	46	267	Perhaps	0	100	2.5191	14.22	16	11	-2	70	68	2.0651	3.8597	-1.7946	2.5364	2.328	0.2084	0.3834	2.2531	-1.8697	1.5025	3.4421	-1.9396	0.4935	3.0307	-2.5372	0.5585	2.9989	-2.4404	0.3284	2.2435	-1.9151	InfUnc_bG50d_Bt	0.913515	0.926778	0.889864	0.935143	0.946728	0.960742	0.961637	0.832027	0.897737	0.951251	0.917681	0.892525	0.964381
bG_C	Bg_35	1	60	244	Yardbird	2	112	2.4649	34.5	26	14	0	67	70	2.957	4.6227	-1.6657	2.7135	2.483	0.2305	1.5927	2.2719	-0.6792	2.6406	3.4136	-0.773	0.4814	2.3226	-1.8412	0.5585	2.9723	-2.4137	0.5257	2.2396	-1.7139	InfUnc_bG50d_C	0.911986	0.972211	0.918587	0.990882	0.953969	0.949387	0.980115	0.963083	0.987066	0.907393	0.976069	0.933509	0.87887
bG_D	Bg_03	1	2	389	An_Oscar	0	115	2.4514	14.29	15	11	0	64	61	2.4701	5.8664	-3.3963	2.5758	2.3211	0.2547	4.4495	12.2919	-7.8424	3.4118	3.18	0.2318	0.7983	1.9637	-1.1654	0.9079	1.927	-1.0191	0.6946	1.0142	-0.3196	InfUnc_bG50d_D	0.941272	0.902596	0.925994	0.98552	0.969977	0.970829	0.971892	0.886175	0.989418	0.975499	0.967141	0.956138	0.977831
bG_E	Bg_33	1	31	155	Klaun_St	1	150	2.2934	14.1	27	12	-1	70	57	1.7924	4.3729	-2.5806	2.3904	2.3085	0.0818	3.8745	9.5708	-5.6963	2.9666	0.6826	2.284	0.407	2.6288	-2.2219	0.4606	2.6153	-2.1546	0.3563	2.3107	-1.9544	InfUnc_bG50d_E	0.936846	0.861443	0.931926	0.979487	0.961238	0.939375	0.945821	0.928681	0.943221	0.930105	0.906301	0.948561	0.952127
bG_Ft	Bg_31t	1	11	152	Bird_Get	0	170	2.2032	9.41	18	12	-6	71	58	1.8252	4.8505	-3.0252	2.3064	2.2988	0.0077	3.9048	9.5708	-5.666	2.842	0.6826	2.1594	0.4142	2.6971	-2.2829	0.4626	2.6099	-2.1473	0.3187	2.3101	-1.9914	InfUnc_bG50d_Ft	0.83229	0.927541	0.916497	0.973092	0.939382	0.915418	0.958282	0.91085	0.957872	0.92707	0.935359	0.976658	0.939408
bG_G	Bg_11	1	18	145	Celerity	0	138	2.3476	7.08	33	17	-2	67	73	1.6848	4.792	-3.1072	2.4267	2.391	0.0357	0.4105	6.4363	-6.0258	1.5847	2.5861	-1.0014	0.8322	3.2367	-2.4045	1.1217	3.1605	-2.0389	0.9026	2.489	-1.5864	InfUnc_bG50d_G	0.948837	0.966231	0.958208	0.992413	0.993743	0.997403	0.966291	0.947115	0.967218	0.970393	0.977429	0.98408	0.978418
bG_H	Bg_27	1	54	138	Si_Si	0	94	2.5461	0	13	10	-1	73	73	2.6036	5.268	-2.6644	2.5323	2.3835	0.1488	0.2066	8.2366	-8.03	1.023	3.0469	-2.024	0.6663	3.4156	-2.7493	0.7515	3.1092	-2.3577	0.6204	2.3102	-1.6898	InfUnc_bG50d_H	0.985549	0.932319	0.936217	0.970594	0.890362	0.977905	0.990263	0.961019	0.974017	0.95457	0.961941	0.980692	0.994069
bG_I	Bg_18	1	14	529	Blues_(F	0	133	2.3724	2.76	30	15	-2	62	64	1.6638	4.4531	-2.7892	2.4782	2.4997	-0.0215	2.6458	9.2029	-6.5571	2.3731	2.3768	-0.0037	1.16	1.7845	-0.6245	1.2333	2.2756	-1.0423	1.0294	1.223	-0.1936	InfUnc_bG50d_I	0.932923	0.948896	0.930342	0.972605	0.971806	0.981458	0.967819	0.955657	0.941651	0.960904	0.978193	0.97968	0.939293
bG_J	Bg_07	1	12	332	Bloomdid	1	120	2.4288	15.79	20	13	-2	63	58	3.087	5.2349	-2.1479	2.7406	2.7356	0.005	8.2443	8.3098	-0.0655	0.9699	1.6347	-0.6649	0.8815	3.1355	-2.254	1.7182	3.1103	-1.392	1.3467	2.333	-0.9863	InfUnc_bG50d_J	0.947136	0.940659	0.965371	0.989212	0.92511	0.975904	0.972638	0.967984	0.976712	0.985926	0.962894	0.980674	0.995684
bG_K	Bg_09	1	14	223	Blues_(F	0	133	2.3724	3.33	25	13	-2	60	58	2.2327	4.3094	-2.0767	2.348	2.4407	-0.0928	5.7271	8.3098	-2.5827	3.2923	1.6347	1.6576	0.9701	3.131	-2.1609	1.718	3.0849	-1.3669	1.3467	2.3266	-0.9799	InfUnc_bG50d_K	0.938083	0.910657	0.93212	0.996806	0.894787	0.937688	0.975352	0.980906	0.97819	0.970185	0.947106	0.974962	0.967348
bG_L	Bg_16	1	36	510	Merry-Go	0	150	2.2934	0	17	13	-2	67	58	2.6216	6.1093	-3.4877	2.58	2.345	0.235	5.449	8.3098	-2.8608	3.1882	1.6347	1.5535	1.1151	3.194	-2.0789	1.7206	3.1064	-1.3857	1.3485	2.329	-0.9804	InfUnc_bG50d_L	0.933507	0.963158	0.960739	0.970252	0.948157	0.949698	0.979403	0.924957	0.982446	0.969459	0.918211	0.957711	0.940481
gB_A	Gb_03	2	2	314	An_Oscar	1	115	2.4514	15.45	45	16	0	64	66	2.1431	5.301	-3.1579	2.4161	2.3376	0.0785	6.7815	7.2027	-0.4212	2.4024	2.7166	-0.3142	3.3936	0.5303	2.8632	3.7229	0.5303	3.1926	2.6799	0.2846	2.3952	InfUnc_gB50d_A	0.98228	0.985021	0.937024	0.935946	0.953535	0.926939	0.958679	0.889763	0.898427	0.967041	0.950348	0.954918	0.961667
gB_B	Gb_28	2	23	390	Constell	0	162	2.2393	0	32	16	0	64	66	2.4271	4.5759	-2.1488	2.5839	2.5359	0.0479	3.8931	7.2855	-3.3925	4.0098	3.0009	1.0089	3.0992	2.0613	1.0379	3.011	2.0113	0.9996	2.4989	1.2986	1.2003	InfUnc_gB50d_B	0.950113	0.988878	0.861456	0.974602	0.959408	0.963982	0.991262	0.940253	0.979979	0.966257	0.967453	0.967746	0.984166
gB_C	Gb_04	2	23	272	Constell	0	162	2.2393	13.64	25	13	0	70	66	2.0748	4.1497	-2.0749	2.5841	2.5542	0.0299	6.2634	7.5033	-1.2399	2.4282	2.6178	-0.1897	3.3548	0.5303	2.8244	3.1917	0.5303	2.6613	2.2954	0.2846	2.0107	InfUnc_gB50d_C	0.88497	0.985777	0.962446	0.972644	0.967231	0.919631	0.971236	0.949344	0.983113	0.900977	0.966967	0.975574	0.968897
gB_D	Gb_12	2	23	457	Constell	1	162	2.2393	16.5	26	14	0	70	66	2.1962	4.5218	-2.3256	2.663	2.5343	0.1288	5.7021	7.3038	-1.6017	3.0939	2.7347	0.3593	3.1461	0.5303	2.6158	2.9561	0.5303	2.4257	2.2161	0.2846	1.9315	InfUnc_gB50d_D	0.928996	0.976863	0.948942	0.994855	0.954292	0.893907	0.98136	0.956722	0.995195	0.936096	0.96551	0.985123	0.970499
gB_E	Gb_30	2	2	110	An_Oscar	1	115	2.4514	30.56	13	8	0	65	66	4.4889	6.9705	-2.4816	2.8558	2.2853	0.5705	2.7557	9.0115	-6.2558	3.8136	2.3265	1.4871	2.8824	0.5303	2.3521	2.4125	0.5303	1.8822	1.8067	0.2846	1.5221	InfUnc_gB50d_E	0.966262	0.953666	0.947766	0.96969	0.93659	0.964563	0.964366	0.898765	0.982604	0.974244	0.977187	0.979858	0.974628
gB_Ft	Gb_01t	2	8	104	Ballade	3	70	2.6544	21.23	28	14	-3	71	69	2.9216	4.1227	-1.2011	2.7197	2.0891	0.6306	7.2344	8.0834	-0.8491	2.5629	2.7487	-0.1858	3.6307	0.5303	3.1004	3.5164	0.5303	2.9861	2.5605	0.2846	2.2759	InfUnc_gB50d_Ft	0.981878	0.965662	0.973538	0.974549	0.944007	0.964968	0.963479	0.970082	0.965632	0.945509	0.961438	0.972266	0.963011
gB_G	Gb_32	2	37	389	Mohawk_N	2	84	2.5913	29.73	15	7	-2	65	63	3.0359	3.6451	-0.6092	3.0618	2.4518	0.61	2.0238	3.4578	-1.434	3.7545	2.2612	1.4933	3.2517	0.8742	2.3775	3.7581	0.8742	2.8839	2.496	0.743	1.753	InfUnc_gB50d_G	0.953666	0.940947	0.955386	0.980906	0.971736	0.956933	0.929702	0.916367	0.895918	0.92046	0.918792	0.967348	0.966269
gB_Ht	Gb_23	2	23	86	Constell	0	162	2.2393	1.95	42	18	0	64	63	2.6537	4.4235	-1.7698	2.7287	2.4757	0.253	1.8942	2.8137	-0.9195	3.9771	2.7858	1.1913	3.4524	1.2072	2.2451	3.5168	1.2073	2.3095	2.3891	1.0563	1.3329	InfUnc_gB50d_Ht	0.956095	0.950089	0.97614	0.983166	0.99722	0.950204	0.992189	0.956317	0.947037	0.956102	0.94436	0.99066	0.963293
gB_I	Gb_25	2	28	149	K._C._Bl	1	63	2.686	18.77	24	11	0	69	61	2.4215	3.4631	-1.0416	2.7827	2.2521	0.5306	2.806	8.7265	-5.9204	3.2303	2.3555	0.8748	3.6272	0.6826	2.9446	3.4621	0.6826	2.7795	2.533	0.3611	2.1719	InfUnc_gB50d_I	0.987564	0.927829	0.951583	0.972118	0.936051	0.922775	0.947037	0.949655	0.963224	0.960156	0.986651	0.938508	0.980938
gB_J	Gb_34	2	48	347	Relaxing	1	90	2.5642	31.28	14	10	-5	65	66	3.6269	4.2451	-0.6182	3.1826	2.3821	0.8005	2.2629	2.8326	-0.5696	4.0658	2.795	1.2709	3.3682	1.2075	2.1607	3.5495	1.2071	2.3423	2.4243	1.0562	1.3681	InfUnc_gB50d_J	0.926049	0.955925	0.949863	0.991024	0.937247	0.957705	0.964513	0.975343	0.983208	0.968911	0.996297	0.971389	0.98328
gB_K	Gb_07	2	2	526	An_Oscar	3	115	2.4514	39.52	19	6	0	65	66	3.5554	6.3261	-2.7707	2.7787	2.196	0.5827	6.7188	7.052	-0.3332	2.4297	2.7414	-0.3117	3.2649	0.5304	2.7345	2.2553	0.5304	1.7249	1.0489	0.2847	0.7643	InfUnc_gB50d_K	0.956857	0.910424	0.897592	0.933714	0.960759	0.966391	0.967757	0.89383	0.960341	0.97598	0.987687	0.88896	0.987586
gB_L	Gb_29	2	18	70	Celerity	2	138	2.3476	29	21	12	-2	71	64	3.3371	4.8177	-1.4806	2.8931	2.3838	0.5093	2.037	7.9721	-5.9351	3.3601	3.443	-0.0829	3.417	1.6355	1.7816	3.3368	1.6355	1.7013	2.5271	0.8989	1.6282	InfUnc_gB50d_L	0.916016	0.910567	0.967716	0.981474	0.982948	0.968302	0.941176	0.944801	0.99442	0.97244	0.930192	0.986005	0.979701
[truncated: 53 more columns]

## Sheet: InfUnc calculation
subject	Unexpect_bG50d_A_p1	Unexpect_bG50d_A_p2	Unexpect_bG50d_A_p3	Unexpect_bG50d_A_p4	Unexpect_bG50d_A_p5	Unexpect_bG50d_A_p6	Unexpect_bG50d_A_p7	Unexpect_bG50d_A_p8	Unexpect_bG50d_A_p9	SUM	Unexpect_bG50d_A_p1	Unexpect_bG50d_A_p2	Unexpect_bG50d_A_p3	Unexpect_bG50d_A_p4	Unexpect_bG50d_A_p5	Unexpect_bG50d_A_p6	Unexpect_bG50d_A_p7	Unexpect_bG50d_A_p8	Unexpect_bG50d_A_p9	SUM	Absolute Entropy	Normalised absolute entropy	Unexpect_bG50d_Bt_p1	Unexpect_bG50d_Bt_p2	Unexpect_bG50d_Bt_p3	Unexpect_bG50d_Bt_p4	Unexpect_bG50d_Bt_p5	Unexpect_bG50d_Bt_p6	Unexpect_bG50d_Bt_p7	Unexpect_bG50d_Bt_p8	Unexpect_bG50d_Bt_p9	SUM	Unexpect_bG50d_Bt_p1	Unexpect_bG50d_Bt_p2	Unexpect_bG50d_Bt_p3	Unexpect_bG50d_Bt_p4	Unexpect_bG50d_Bt_p5	Unexpect_bG50d_Bt_p6	Unexpect_bG50d_Bt_p7	Unexpect_bG50d_Bt_p8	Unexpect_bG50d_Bt_p9	SUM	Absolute Entropy	Normalised absolute entropy	Unexpect_bG50d_C_p1	Unexpect_bG50d_C_p2	Unexpect_bG50d_C_p3	Unexpect_bG50d_C_p4	Unexpect_bG50d_C_p5
cc01	3	3	3	6	1	6	7	6	7	42	0.0714286	0.0714286	0.0714286	0.142857	0.0238095	0.142857	0.166667	0.142857	0.166667	1	3.00906	0.949252	2	3	4	9	9	2	5	6	1	41	0.0487805	0.0731707	0.097561	0.219512	0.219512	0.0487805	0.121951	0.146341	0.0243902	1	2.89577	0.913515	6	8	6	8	8
cc03	3	8	4	6	2	9	6	1	2	41	0.0731707	0.195122	0.097561	0.146341	0.0487805	0.219512	0.146341	0.0243902	0.0487805	1	2.91112	0.918356	7	9	1	8	8	2	3	9	4	51	0.137255	0.176471	0.0196078	0.156863	0.156863	0.0392157	0.0588235	0.176471	0.0784314	1	2.93782	0.926778	3	8	6	7	8
cc04	3	4	3	3	2	9	3	2	6	35	0.0857143	0.114286	0.0857143	0.0857143	0.0571429	0.257143	0.0857143	0.0571429	0.171429	1	2.98475	0.941584	1	9	1	9	3	2	3	4	4	36	0.0277778	0.25	0.0277778	0.25	0.0833333	0.0555556	0.0833333	0.111111	0.111111	1	2.8208	0.889864	3	6	1	9	4
cc05	6	6	4	5	4	7	7	6	5	50	0.12	0.12	0.08	0.1	0.08	0.14	0.14	0.12	0.1	1	3.14282	0.991451	3	8	3	9	6	2	4	3	2	40	0.075	0.2	0.075	0.225	0.15	0.05	0.1	0.075	0.05	1	2.96433	0.935143	5	8	6	8	7
cc06	3	9	5	5	3	9	9	4	6	53	0.0566038	0.169811	0.0943396	0.0943396	0.0566038	0.169811	0.169811	0.0754717	0.113208	1	3.05194	0.962781	2	7	3	8	8	2	5	8	4	47	0.0425532	0.148936	0.0638298	0.170213	0.170213	0.0425532	0.106383	0.170213	0.0851064	1	3.00106	0.946728	3	8	2	9	4
cc07	3	2	2	4	3	7	5	9	6	41	0.0731707	0.0487805	0.0487805	0.097561	0.0731707	0.170732	0.121951	0.219512	0.146341	1	2.99633	0.945238	8	5	4	5	2	3	8	8	8	51	0.156863	0.0980392	0.0784314	0.0980392	0.0392157	0.0588235	0.156863	0.156863	0.156863	1	3.04548	0.960742	2	5	2	3	6
cc08	4	6	3	7	6	9	7	4	9	55	0.0727273	0.109091	0.0545455	0.127273	0.109091	0.163636	0.127273	0.0727273	0.163636	1	3.08798	0.974148	7	7	6	9	6	1	7	7	4	54	0.12963	0.12963	0.111111	0.166667	0.111111	0.0185185	0.12963	0.12963	0.0740741	1	3.04832	0.961637	5	9	5	8	6
cc17	1	6	4	5	8	9	8	9	9	59	0.0169492	0.101695	0.0677966	0.0847458	0.135593	0.152542	0.135593	0.152542	0.152542	1	3.0232	0.953712	1	9	1	9	2	1	1	9	5	38	0.0263158	0.236842	0.0263158	0.236842	0.0526316	0.0263158	0.0263158	0.236842	0.131579	1	2.63746	0.832027	4	9	4	9	9
cc21	5	5	5	5	2	4	6	2	4	38	0.131579	0.131579	0.131579	0.131579	0.0526316	0.105263	0.157895	0.0526316	0.105263	1	3.09139	0.975226	2	3	2	9	7	1	2	4	2	32	0.0625	0.09375	0.0625	0.28125	0.21875	0.03125	0.0625	0.125	0.0625	1	2.84576	0.897737	5	5	5	7	6
cc22	5	7	1	1	4	8	5	4	1	36	0.138889	0.194444	0.0277778	0.0277778	0.111111	0.222222	0.138889	0.111111	0.0277778	1	2.86796	0.90474	3	3	8	9	7	4	2	4	7	47	0.0638298	0.0638298	0.170213	0.191489	0.148936	0.0851064	0.0425532	0.0851064	0.148936	1	3.0154	0.951251	2	5	1	7	6
cc28	4	5	3	2	1	6	7	7	6	41	0.097561	0.121951	0.0731707	0.0487805	0.0243902	0.146341	0.170732	0.170732	0.146341	1	2.99933	0.946184	2	6	2	9	4	1	4	7	9	44	0.0454545	0.136364	0.0454545	0.204545	0.0909091	0.0227273	0.0909091	0.159091	0.204545	1	2.90898	0.917681	7	9	6	5	2
cc30	3	8	5	7	6	9	7	5	8	58	0.0517241	0.137931	0.0862069	0.12069	0.103448	0.155172	0.12069	0.0862069	0.137931	1	3.11115	0.981458	2	8	2	9	5	1	4	1	7	39	0.0512821	0.205128	0.0512821	0.230769	0.128205	0.025641	0.102564	0.025641	0.179487	1	2.82924	0.892525	2	4	2	8	4
cc31	5	7	3	8	3	8	5	2	8	49	0.102041	0.142857	0.0612245	0.163265	0.0612245	0.163265	0.102041	0.0408163	0.163265	1	3.03552	0.957598	4	6	4	7	2	4	8	7	3	45	0.0888889	0.133333	0.0888889	0.155556	0.0444444	0.0888889	0.177778	0.155556	0.0666667	1	3.05702	0.964381	1	1	1	7	4
cc32	3	6	1	4	8	8	4	1	9	44	0.0681818	0.136364	0.0227273	0.0909091	0.181818	0.181818	0.0909091	0.0227273	0.204545	1	2.89593	0.913565	5	5	2	7	1	2	4	3	4	33	0.151515	0.151515	0.0606061	0.212121	0.030303	0.0606061	0.121212	0.0909091	0.121212	1	2.99513	0.944859	2	4	1	8	6
cc33	2	7	7	3	3	2	2	3	4	33	0.0606061	0.212121	0.212121	0.0909091	0.0909091	0.0606061	0.0606061	0.0909091	0.121212	1	2.99689	0.945414	2	3	8	2	3	2	7	3	7	37	0.0540541	0.0810811	0.216216	0.0540541	0.0810811	0.0540541	0.189189	0.0810811	0.189189	1	2.95087	0.930895	3	4	4	6	6
cc34	3	2	2	7	1	9	4	3	3	34	0.0882353	0.0588235	0.0588235	0.205882	0.0294118	0.264706	0.117647	0.0882353	0.0882353	1	2.89789	0.914183	1	1	1	9	1	1	3	1	1	19	0.0526316	0.0526316	0.0526316	0.473684	0.0526316	0.0526316	0.157895	0.0526316	0.0526316	1	2.49613	0.78744	4	8	6	7	1
cc36	7	5	8	8	4	9	9	6	9	65	0.107692	0.0769231	0.123077	0.123077	0.0615385	0.138462	0.138462	0.0923077	0.138462	1	3.12454	0.985682	5	8	5	9	5	2	5	2	4	45	0.111111	0.177778	0.111111	0.2	0.111111	0.0444444	0.111111	0.0444444	0.0888889	1	3.0259	0.954565	5	7	3	9	5
cc38	4	8	5	5	3	6	6	4	4	45	0.0888889	0.177778	0.111111	0.111111	0.0666667	0.133333	0.133333	0.0888889	0.0888889	1	3.11421	0.982425	4	4	5	8	5	3	6	6	4	45	0.0888889	0.0888889	0.111111	0.177778	0.111111	0.0666667	0.133333	0.133333	0.0888889	1	3.11421	0.982425	4	5	5	6	5
cc41	2	8	3	5	6	7	4	6	7	48	0.0416667	0.166667	0.0625	0.104167	0.125	0.145833	0.0833333	0.125	0.145833	1	3.07065	0.968682	2	7	3	7	8	7	2	2	5	43	0.0465116	0.162791	0.0697674	0.162791	0.186047	0.162791	0.0465116	0.0465116	0.116279	1	2.97699	0.939135	2	5	2	9	5
cc42	8	8	8	7	6	9	9	7	8	70	0.114286	0.114286	0.114286	0.1	0.0857143	0.128571	0.128571	0.1	0.114286	1	3.15969	0.996772	5	2	1	9	7	4	2	2	8	40	0.125	0.05	0.025	0.225	0.175	0.1	0.05	0.05	0.2	1	2.87717	0.907645	4	6	7	9	6
cj01	3	3	2	5	1	9	3	3	3	32	0.09375	0.09375	0.0625	0.15625	0.03125	0.28125	0.09375	0.09375	0.09375	1	2.94021	0.927532	1	4	2	8	2	1	5	2	2	27	0.037037	0.148148	0.0740741	0.296296	0.0740741	0.037037	0.185185	0.0740741	0.0740741	1	2.84342	0.896999	4	7	8	9	2
cj02	1	6	1	3	3	9	2	1	4	30	0.0333333	0.2	0.0333333	0.1	0.1	0.3	0.0666667	0.0333333	0.133333	1	2.78859	0.879704	2	7	1	9	2	2	2	5	1	31	0.0645161	0.225806	0.0322581	0.290323	0.0645161	0.0645161	0.0645161	0.16129	0.0322581	1	2.76741	0.87302	5	9	6	9	4
cj07	2	6	2	6	3	9	6	4	6	44	0.0454545	0.136364	0.0454545	0.136364	0.0681818	0.204545	0.136364	0.0909091	0.136364	1	3.02027	0.952788	3	7	4	9	8	2	7	7	6	53	0.0566038	0.132075	0.0754717	0.169811	0.150943	0.0377358	0.132075	0.132075	0.113208	1	3.05342	0.963247	5	6	5	9	5
cj11	2	7	2	5	4	9	3	2	4	38	0.0526316	0.184211	0.0526316	0.131579	0.105263	0.236842	0.0789474	0.0526316	0.105263	1	2.97042	0.937063	8	7	6	8	6	2	8	2	4	51	0.156863	0.137255	0.117647	0.156863	0.117647	0.0392157	0.156863	0.0392157	0.0784314	1	3.03182	0.956432	8	4	6	8	7
cj13	3	5	3	7	7	8	2	1	1	37	0.0810811	0.135135	0.0810811	0.189189	0.189189	0.216216	0.0540541	0.027027	0.027027	1	2.87371	0.906556	3	8	6	7	9	3	9	2	4	51	0.0588235	0.156863	0.117647	0.137255	0.176471	0.0588235	0.176471	0.0392157	0.0784314	1	3.01106	0.949883	8	7	8	7	5
cj14	2	6	1	3	2	6	4	2	7	33	0.0606061	0.181818	0.030303	0.0909091	0.0606061	0.181818	0.121212	0.0606061	0.212121	1	2.94058	0.927649	4	4	4	9	2	4	2	6	4	39	0.102564	0.102564	0.102564	0.230769	0.0512821	0.102564	0.0512821	0.153846	0.102564	1	3.02799	0.955224	2	5	2	7	5
cj18	NA	NA	2	3	3	NA	2	2	NA	12	NA	NA	0.166667	0.25	0.25	NA	0.166667	0.166667	NA	1	2.29248	0.987318	NA	4	3	9	4	NA	3	4	2	29	NA	0.137931	0.103448	0.310345	0.137931	NA	0.103448	0.137931	0.0689655	1	2.64974	0.943855	4	NA	NA	NA	NA
cj20	2	6	1	8	3	9	6	1	6	42	0.047619	0.142857	0.0238095	0.190476	0.0714286	0.214286	0.142857	0.0238095	0.142857	1	2.87295	0.906314	3	7	2	7	4	2	8	7	4	44	0.0681818	0.159091	0.0454545	0.159091	0.0909091	0.0454545	0.181818	0.159091	0.0909091	1	3.01149	0.95002	7	5	4	9	6
cj21	8	8	6	8	8	7	8	8	7	68	0.117647	0.117647	0.0882353	0.117647	0.117647	0.102941	0.117647	0.117647	0.102941	1	3.16375	0.998051	8	5	4	8	8	8	6	8	7	62	0.129032	0.0806452	0.0645161	0.129032	0.129032	0.129032	0.0967742	0.129032	0.112903	1	3.13531	0.98908	7	9	6	8	8
cj23	2	6	2	3	2	8	2	1	3	29	0.0689655	0.206897	0.0689655	0.103448	0.0689655	0.275862	0.0689655	0.0344828	0.103448	1	2.89179	0.912258	2	2	2	9	2	2	6	2	7	34	0.0588235	0.0588235	0.0588235	0.264706	0.0588235	0.0588235	0.176471	0.0588235	0.205882	1	2.86127	0.90263	8	9	3	8	5
cj25	2	4	1	7	1	8	2	1	3	29	0.0689655	0.137931	0.0344828	0.241379	0.0344828	0.275862	0.0689655	0.0344828	0.103448	1	2.775	0.875416	1	3	2	8	2	1	3	1	1	22	0.0454545	0.136364	0.0909091	0.363636	0.0909091	0.0454545	0.136364	0.0454545	0.0454545	1	2.75444	0.86893	9	8	7	9	4
cj27	5	4	5	5	3	1	3	3	5	34	0.147059	0.117647	0.147059	0.147059	0.0882353	0.0294118	0.0882353	0.0882353	0.147059	1	3.06678	0.967461	6	7	4	6	6	7	4	8	9	57	0.105263	0.122807	0.0701754	0.105263	0.105263	0.122807	0.0701754	0.140351	0.157895	1	3.12479	0.985762	4	4	5	4	5
cj28	7	9	9	8	6	7	7	9	9	71	0.0985915	0.126761	0.126761	0.112676	0.084507	0.0985915	0.0985915	0.126761	0.126761	1	3.15564	0.995494	5	6	2	9	6	5	7	4	9	53	0.0943396	0.113208	0.0377358	0.169811	0.113208	0.0943396	0.132075	0.0754717	0.169811	1	3.06851	0.968006	5	7	8	9	7
cj30	3	3	5	9	2	9	7	6	8	52	0.0576923	0.0576923	0.0961538	0.173077	0.0384615	0.173077	0.134615	0.115385	0.153846	1	3.02084	0.952968	8	9	2	7	9	8	9	5	2	59	0.135593	0.152542	0.0338983	0.118644	0.152542	0.135593	0.152542	0.0847458	0.0338983	1	3.02079	0.952954	4	6	4	4	4
cj31	3	8	4	6	7	8	4	7	5	52	0.0576923	0.153846	0.0769231	0.115385	0.134615	0.153846	0.0769231	0.134615	0.0961538	1	3.10088	0.978218	3	8	6	9	7	3	8	8	5	57	0.0526316	0.140351	0.105263	0.157895	0.122807	0.0526316	0.140351	0.140351	0.0877193	1	3.08184	0.972211	7	6	6	8	6
cj32	3	3	3	4	4	8	5	1	4	35	0.0857143	0.0857143	0.0857143	0.114286	0.114286	0.228571	0.142857	0.0285714	0.114286	1	3.01859	0.952259	2	9	3	8	4	1	8	3	1	39	0.0512821	0.230769	0.0769231	0.205128	0.102564	0.025641	0.205128	0.0769231	0.025641	1	2.82286	0.890514	4	7	7	8	9
cj33	2	7	5	2	4	8	7	5	3	43	0.0465116	0.162791	0.116279	0.0465116	0.0930233	0.186047	0.162791	0.116279	0.0697674	1	3.02447	0.954114	1	4	1	9	3	3	1	9	2	33	0.030303	0.121212	0.030303	0.272727	0.0909091	0.0909091	0.030303	0.272727	0.0606061	1	2.72414	0.85937	8	8	6	6	3
cj34	2	9	1	8	7	9	8	1	4	49	0.0408163	0.183673	0.0204082	0.163265	0.142857	0.183673	0.163265	0.0204082	0.0816327	1	2.86552	0.903972	1	4	2	9	6	1	8	2	1	34	0.0294118	0.117647	0.0588235	0.264706	0.176471	0.0294118	0.235294	0.0588235	0.0294118	1	2.73337	0.862283	3	7	2	9	9
cj37	3	3	2	3	2	9	2	2	3	29	0.103448	0.103448	0.0689655	0.103448	0.0689655	0.310345	0.0689655	0.0689655	0.103448	1	2.9425	0.928256	1	4	2	9	2	2	4	3	1	28	0.0357143	0.142857	0.0714286	0.321429	0.0714286	0.0714286	0.142857	0.107143	0.0357143	1	2.83292	0.893686	6	9	8	9	5
cj38	1	3	2	2	1	9	1	1	6	26	0.0384615	0.115385	0.0769231	0.0769231	0.0384615	0.346154	0.0384615	0.0384615	0.230769	1	2.6699	0.84226	2	3	1	9	1	1	4	5	2	28	0.0714286	0.107143	0.0357143	0.321429	0.0357143	0.0357143	0.142857	0.178571	0.0714286	1	2.77543	0.875551	8	6	7	9	1
cj39	4	5	2	2	3	9	2	3	1	31	0.129032	0.16129	0.0645161	0.0645161	0.0967742	0.290323	0.0645161	0.0967742	0.0322581	1	2.90101	0.915167	3	5	2	9	3	1	5	2	2	32	0.09375	0.15625	0.0625	0.28125	0.09375	0.03125	0.15625	0.0625	0.0625	1	2.89818	0.914273	4	7	8	7	8
cj40	4	4	4	4	4	8	5	4	7	44	0.0909091	0.0909091	0.0909091	0.0909091	0.0909091	0.181818	0.113636	0.0909091	0.159091	1	3.11259	0.981912	3	3	4	5	3	5	5	2	2	32	0.09375	0.09375	0.125	0.15625	0.09375	0.15625	0.15625	0.0625	0.0625	1	3.09083	0.975047	5	5	6	6	5
cn02	3	9	8	9	8	8	9	5	8	67	0.0447761	0.134328	0.119403	0.134328	0.119403	0.119403	0.134328	0.0746269	0.119403	1	3.11157	0.981592	7	5	3	2	6	7	3	8	7	48	0.145833	0.104167	0.0625	0.0416667	0.125	0.145833	0.0625	0.166667	0.145833	1	3.05197	0.962789	6	9	2	4	8
cn04	3	6	4	4	4	5	6	1	5	38	0.0789474	0.157895	0.105263	0.105263	0.105263	0.131579	0.157895	0.0263158	0.131579	1	3.06388	0.966547	3	3	3	5	5	4	5	2	3	33	0.0909091	0.0909091	0.0909091	0.151515	0.151515	0.121212	0.151515	0.0606061	0.0909091	1	3.10959	0.980967	7	4	4	4	8
cn08	4	9	6	6	4	6	5	7	6	53	0.0754717	0.169811	0.113208	0.113208	0.0754717	0.113208	0.0943396	0.132075	0.113208	1	3.12736	0.986573	7	7	3	7	9	8	4	2	6	53	0.132075	0.132075	0.0566038	0.132075	0.169811	0.150943	0.0754717	0.0377358	0.113208	1	3.05342	0.963247	8	8	7	9	8
cn09	3	4	4	6	6	5	8	3	5	44	0.0681818	0.0909091	0.0909091	0.136364	0.136364	0.113636	0.181818	0.0681818	0.113636	1	3.10151	0.978417	8	6	5	8	1	3	5	4	7	47	0.170213	0.12766	0.106383	0.170213	0.0212766	0.0638298	0.106383	0.0851064	0.148936	1	3.01979	0.952638	5	6	6	7	2
cn10	3	6	7	5	2	2	3	4	7	39	0.0769231	0.153846	0.179487	0.128205	0.0512821	0.0512821	0.0769231	0.102564	0.179487	1	3.03073	0.956089	2	7	5	2	2	4	7	5	7	41	0.0487805	0.170732	0.121951	0.0487805	0.0487805	0.097561	0.170732	0.121951	0.170732	1	3.01185	0.950133	1	1	3	6	2
cn11	5	6	6	8	4	3	8	4	4	48	0.104167	0.125	0.125	0.166667	0.0833333	0.0625	0.166667	0.0833333	0.0833333	1	3.09779	0.977245	9	7	6	3	8	5	9	7	5	59	0.152542	0.118644	0.101695	0.0508475	0.135593	0.0847458	0.152542	0.118644	0.0847458	1	3.1056	0.979708	8	8	5	6	9
cn13	2	2	7	8	6	3	5	7	3	43	0.0465116	0.0465116	0.162791	0.186047	0.139535	0.0697674	0.116279	0.162791	0.0697674	1	3.00924	0.949309	3	8	1	2	5	6	4	3	6	38	0.0789474	0.210526	0.0263158	0.0526316	0.131579	0.157895	0.105263	0.0789474	0.157895	1	2.98111	0.940436	5	7	5	7	5
cn16	6	8	1	5	5	8	7	6	8	54	0.111111	0.148148	0.0185185	0.0925926	0.0925926	0.148148	0.12963	0.111111	0.148148	1	3.05321	0.963182	9	9	5	3	8	4	9	2	9	58	0.155172	0.155172	0.0862069	0.0517241	0.137931	0.0689655	0.155172	0.0344828	0.155172	1	3.02209	0.953362	7	8	6	9	9
cn17	3	8	4	3	2	4	8	4	4	40	0.075	0.2	0.1	0.075	0.05	0.1	0.2	0.1	0.1	1	3.03418	0.957178	4	4	3	9	7	3	4	8	8	50	0.08	0.08	0.06	0.18	0.14	0.06	0.08	0.16	0.16	1	3.05004	0.962182	7	6	4	6	4
cn18	4	6	5	6	7	3	8	3	6	48	0.0833333	0.125	0.104167	0.125	0.145833	0.0625	0.166667	0.0625	0.125	1	3.09954	0.977796	5	5	2	6	4	5	7	6	7	47	0.106383	0.106383	0.0425532	0.12766	0.0851064	0.106383	0.148936	0.12766	0.148936	1	3.10456	0.979379	3	7	5	7	2
cn19	5	8	6	5	4	7	7	7	7	56	0.0892857	0.142857	0.107143	0.0892857	0.0714286	0.125	0.125	0.125	0.125	1	3.14066	0.990767	5	7	4	6	4	5	7	6	3	47	0.106383	0.148936	0.0851064	0.12766	0.0851064	0.106383	0.148936	0.12766	0.0638298	1	3.12274	0.985116	5	6	8	7	2
cn23	8	2	7	4	9	8	9	7	9	63	0.126984	0.031746	0.111111	0.0634921	0.142857	0.126984	0.142857	0.111111	0.142857	1	3.07425	0.969818	8	4	4	9	8	9	3	8	1	54	0.148148	0.0740741	0.0740741	0.166667	0.148148	0.166667	0.0555556	0.148148	0.0185185	1	2.98056	0.940263	7	7	4	6	8
cn24	7	9	8	6	6	8	8	7	8	67	0.104478	0.134328	0.119403	0.0895522	0.0895522	0.119403	0.119403	0.104478	0.119403	1	3.15785	0.996192	4	8	7	7	7	7	5	6	7	58	0.0689655	0.137931	0.12069	0.12069	0.12069	0.12069	0.0862069	0.103448	0.12069	1	3.14459	0.992007	5	7	4	4	5
cn27	9	9	9	9	9	9	9	6	9	78	0.115385	0.115385	0.115385	0.115385	0.115385	0.115385	0.115385	0.0769231	0.115385	1	3.16047	0.997019	9	9	9	9	9	9	9	9	9	81	0.111111	0.111111	0.111111	0.111111	0.111111	0.111111	0.111111	0.111111	0.111111	1	3.16993	1	9	9	9	9	9
cn28	8	9	4	7	4	9	8	8	9	66	0.121212	0.136364	0.0606061	0.106061	0.0606061	0.136364	0.121212	0.121212	0.136364	1	3.11652	0.983154	5	9	8	7	7	9	9	7	9	70	0.0714286	0.128571	0.114286	0.1	0.1	0.128571	0.128571	0.1	0.128571	1	3.14812	0.993121	9	8	8	9	7
cn29	4	8	6	6	4	5	6	5	6	50	0.08	0.16	0.12	0.12	0.08	0.1	0.12	0.1	0.12	1	3.13869	0.990146	4	4	3	7	6	6	7	5	3	45	0.0888889	0.0888889	0.0666667	0.155556	0.133333	0.133333	0.155556	0.111111	0.0666667	1	3.10425	0.979283	8	6	3	9	4
cn33	7	7	6	3	8	4	7	2	7	51	0.137255	0.137255	0.117647	0.0588235	0.156863	0.0784314	0.137255	0.0392157	0.137255	1	3.06712	0.967568	4	8	3	5	9	3	8	8	6	54	0.0740741	0.148148	0.0555556	0.0925926	0.166667	0.0555556	0.148148	0.148148	0.111111	1	3.06677	0.967457	7	3	6	8	2
cn36	5	7	8	7	3	2	9	8	9	58	0.0862069	0.12069	0.137931	0.12069	0.0517241	0.0344828	0.155172	0.137931	0.155172	1	3.05236	0.962912	9	9	8	3	8	3	7	2	6	55	0.163636	0.163636	0.145455	0.0545455	0.145455	0.0545455	0.127273	0.0363636	0.109091	1	3.02264	0.953536	7	6	9	1	8
cn37	5	5	5	4	7	7	7	5	8	53	0.0943396	0.0943396	0.0943396	0.0754717	0.132075	0.132075	0.132075	0.0943396	0.150943	1	3.1356	0.989171	6	8	6	7	9	6	7	4	4	57	0.105263	0.140351	0.105263	0.122807	0.157895	0.105263	0.122807	0.0701754	0.0701754	1	3.12479	0.985762	3	4	7	8	6
cn38	2	7	8	7	6	7	8	5	9	59	0.0338983	0.118644	0.135593	0.118644	0.101695	0.118644	0.135593	0.0847458	0.152542	1	3.09276	0.975657	4	9	5	8	2	8	8	3	6	53	0.0754717	0.169811	0.0943396	0.150943	0.0377358	0.150943	0.150943	0.0566038	0.113208	1	3.04106	0.959347	1	7	2	7	4
subject	Unexpect_bG50d_A_p1	Unexpect_bG50d_A_p2	Unexpect_bG50d_A_p3	Unexpect_bG50d_A_p4	Unexpect_bG50d_A_p5	Unexpect_bG50d_A_p6	Unexpect_bG50d_A_p7	Unexpect_bG50d_A_p8	Unexpect_bG50d_A_p9	SUM	Unexpect_bG50d_A_p1	Unexpect_bG50d_A_p2	Unexpect_bG50d_A_p3	Unexpect_bG50d_A_p4	Unexpect_bG50d_A_p5	Unexpect_bG50d_A_p6	Unexpect_bG50d_A_p7	Unexpect_bG50d_A_p8	Unexpect_bG50d_A_p9	SUM	Absolute Entropy	Relative entropy	Unexpect_bG50d_Bt_p1	Unexpect_bG50d_Bt_p2	Unexpect_bG50d_Bt_p3	Unexpect_bG50d_Bt_p4	Unexpect_bG50d_Bt_p5	Unexpect_bG50d_Bt_p6	Unexpect_bG50d_Bt_p7	Unexpect_bG50d_Bt_p8	Unexpect_bG50d_Bt_p9	SUM	Unexpect_bG50d_Bt_p1	Unexpect_bG50d_Bt_p2	Unexpect_bG50d_Bt_p3	Unexpect_bG50d_Bt_p4	Unexpect_bG50d_Bt_p5	Unexpect_bG50d_Bt_p6	Unexpect_bG50d_Bt_p7	Unexpect_bG50d_Bt_p8	Unexpect_bG50d_Bt_p9	SUM	Absolute Entropy	Relative entropy	Unexpect_bG50d_C_p1	Unexpect_bG50d_C_p2	Unexpect_bG50d_C_p3	Unexpect_bG50d_C_p4	Unexpect_bG50d_C_p5
NON	4.8	6.75	5.95	5.9	5.4	5.65	7.25	5.2	6.85	NON	0.0876733	0.127153	0.111895	0.111004	0.100063	0.10294	0.136425	0.0959228	0.126924			NON	5.75	6.8	4.65	5.75	6.2	5.7	6.35	5.25	5.95	NON	0.108711	0.130386	0.0863832	0.110484	0.117637	0.109522	0.122181	0.100228	0.114467			NON	5.9	6.35	5.35	6.65	5.6
CLASSSICAL	3.85	6	3.95	5.15	3.8	7.5	6	4.55	6.05	CLASSSICAL	0.0830558	0.130097	0.0842385	0.109849	0.0789028	0.163091	0.126823	0.0967105	0.127232			CLASSSICAL	3.4	5.65	3.3	8	4.95	2.35	4.25	4.8	4.65	CLASSSICAL	0.0792921	0.135509	0.0782208	0.204609	0.11807	0.0567285	0.103443	0.112589	0.111539			CLASSSICAL	3.6	6.2	3.75	7.45	5.4
JAZZ	3.04762	5.47619	2.95455	5.04545	3.63636	7.95238	4.13636	3.09091	4.71429	JAZZ	0.0745706	0.137894	0.075367	0.132514	0.0949141	0.212928	0.103134	0.0754869	0.117887			JAZZ	3.33333	5.45455	2.95455	8.18182	4.5	3.04762	5.54545	4.40909	3.54545	JAZZ	0.074827	0.135186	0.072299	0.221939	0.104588	0.0697444	0.137516	0.108644	0.0818276			JAZZ	5.68182	6.71429	5.80952	7.71429	5.38095
ALL	3.88525	6.06557	4.24194	5.35484	4.25806	7.04918	5.74194	4.24194	5.85246	ALL	0.0816486	0.131816	0.0900121	0.118264	0.0914101	0.160526	0.121515	0.0889254	0.123914			ALL	4.14754	5.95161	3.6129	7.33871	5.19355	3.68852	5.3871	4.80645	4.67742	ALL	0.0874006	0.133742	0.0787526	0.180395	0.113147	0.0785186	0.121578	0.107202	0.101941			ALL	5.08065	6.42623	4.98361	7.27869	5.45902
[truncated: 479 more columns]
