# Supplementary material for: "If You Have to Ask, You'll Never Know": Effects of Specialised Stylistic Expertise on Predictive Processing of Music
Source: PLoS One. 2016 Oct 12;11(10):e0163584. doi: 10.1371/journal.pone.0163584 (PMC5061385; doi:10.1371/journal.pone.0163584)
Supplement: S3 Table — (XLSX) [file pone.0163584.s003.xlsx]

## Sheet: by.subject
Participant_ID	Expertise	Gender	Age	Occupational_status	Musical_genre	Obtained_qualification	Expected_qualification	Professional	Instrument	Yrs_formal_music_training	Yrs_daily_music_practice	Hrs_daily_practice_at_peak_of_interest	Gold-MSI_09_F1_(Importance)	Gold-MSI_09_F2_(Perception&Production)	Gold-MSI_09_F3_(MusicalTraining)	Gold-MSI_09_F4_(Emotions)	Gold-MSI_09_F5_(Body)	Gold-MSI_09_F6_(Creativity)	Gold-MSI_09_F7_(Openness)	Gold-MSI_10_F1_(ActiveEngagement)	Gold-MSI_10_F2_(PerceptualAbilities)	Gold-MSI_10_F3_(MusicalTraining)	Gold-MSI_10_F4_(Emotions)	Gold-MSI_10_F5_(SingingAbilities)	Gold-MSI_10_FG_(GeneralSophistication)	Gold-MSI_Genre_prs	Gold-MSI_Genre_rnd	Gold-MSI_Melody_acc	Gold-MSI_Melody_dpr	Gold-MSI_Melody_tpr	Gold-MSI_Melody_fpr	Gold-MSI_Melody_auc	Jazz_concerts_attended	Jazz_concerts_performed	Jazz_course_yes_no	Jazz_collection	Jazz_songs_singorplay	RANK_Jazz_concerts_attended	RANK_Jazz_concerts_performed	RANK_Jazz_collection	RANK_Jazz_songs_singorplay	Jazz_score_COMPLETE	ExpUnc_Bfit_1_32	ExpUnc_Gfit_1_32	ExpUnc_Bfit_2_32	ExpUnc_Gfit_2_32	ExpUnc_Bfit_2_9	ExpUnc_Gfit_2_9	ExpUnc_Bfit_1_32
cc01	1	1	30	5	3	5	NA	1	piano	10+	10+	3-4	86	104	55	53	38	54	32	48	57	43	39	40	106	12	0.375	0.846154	2.40615	0.75	0.0416667	0.9375	30	0	yes	70	0	39	35	40	28	142	-0.16564	0.0211636	-0.238192	0.0386145	-0.228589	0.0150526	-0.0537135
cc03	1	2	27	5	3	5	NA	1	classical_guitar	10+	6-9	5+	80	103	54	49	40	48	34	44	55	44	38	34	96	18	0.6875	0.615385	1.41303	0.375	0.0416667	0.875	20	0	no	50	2	38	35	38	32	143	0.0191946	-0.127202	0.0375814	-0.105515	0.0202792	-0.153217	0.0875542
cc04	1	1	24	5	3	5	NA	1	violin	10+	10+	3-4	79	91	56	48	32	43	38	44	49	43	35	33	95	9	0.21875	0.769231	2.0503	0.625	0.0416667	1	15	0	yes	50	0	36	35	38	28	137	0.180263	-0.0164753	0.245073	-0.0335395	0.243767	-0.0692823	0.103287
cc05	1	2	28	2	3	5	NA	1	piano	10+	10+	5+	79	91	56	45	37	35	36	43	50	43	33	25	85	12	0.375	0.769231	2.0503	0.625	0.0416667	0.85	10	0	no	50	0	34	35	38	28	135	-0.0604467	0.0800412	-0.0920939	0.0723322	-0.0727408	0.124943	-0.0292121
cc06	1	1	22	2	3	4	NA	1	violin	10+	10+	3-4	68	103	52	42	32	49	33	39	57	46	32	38	100	12	0.375	0.846154	1.99197	0.875	0.2	0.7625	10	0	no	30	2	34	35	29	32	130	0.0766162	-0.288421	0.0686718	-0.232471	0.100361	-0.27204	0.262327
cc07	1	1	29	5	2	5	NA	1	flute	10+	10+	5+	96	99	58	55	44	53	39	54	59	45	41	42	111	12	0.375	0.846154	2.40615	0.75	0.0416667	0.9375	50	1	no	0	0	41	37	12	28	118	-0.0627305	0.14728	-0.00255563	0.143555	0.0299415	0.149242	-0.115065
cc08	1	1	31	5	3	5	NA	1	piano	10+	10+	3-4	75	105	51	48	40	39	35	45	59	43	36	31	92	8	0.166667	0.923077	2.88201	0.875	0.0416667	0.9375	200	0	no	50	0	50	35	38	28	151	-0.398425	0.395056	-0.272208	0.416118	-0.187114	0.396871	-0.36674
cc17	1	1	42	3	3	4	NA	1	violin	10+	10+	5+	67	105	53	49	40	43	27	32	58	41	36	35	95	13	0.427083	0.769231	1.51611	0.75	0.2	0.8875	4	20	no	100	0	21	41	43	28	133	-0.198345	0.0572683	-0.14226	0.0742594	-0.14883	0.184715	-0.275901
cc21	1	2	42	5	1	4	NA	1	double_bass	10+	10+	5+	80	99	58	47	38	45	31	44	53	45	35	32	99	8	0.166667	0.769231	2.0503	0.625	0.0416667	0.9	10	0	no	30	3	34	35	29	34	132	-0.137981	0.169114	-0.0202746	0.187526	0.079132	0.100449	-0.00923665
cc22	1	2	30	5	3	5	NA	1	violin	10+	10+	3-4	96	100	59	56	49	60	42	60	51	45	42	46	119	16	0.583333	0.846154	2.40615	0.75	0.0416667	0.95	10	3	yes	50	4	34	39	38	37	148	0.281639	-0.351794	0.284459	-0.365351	0.364234	-0.397049	0.414979
cc28	1	1	20	2	1	6	5	1	harp	10+	10+	3-4	97	103	54	54	40	38	38	54	58	42	40	30	103	16	0.583333	0.846154	2.40615	0.75	0.0416667	0.975	2	0	no	4	8	16	35	16	39	106	0.0592721	-0.0333052	0.0773786	-0.000822134	0.139623	-0.0335609	0.109584
cc30	1	1	28	5	3	5	NA	1	cello	10+	10+	5+	76	97	59	50	42	43	39	45	52	45	37	34	100	12	0.375	0.769231	2.0503	0.625	0.0416667	0.8875	10	0	no	10	0	34	35	21	28	118	-0.219332	0.266238	-0.128673	0.171025	-0.0839663	0.171013	-0.134571
cc31	1	1	19	2	1	6	5	1	piano	10+	10+	3-4	98	110	57	55	36	55	42	59	62	44	41	41	113	24	1	0.692308	1.16026	0.625	0.2	0.7125	5	0	no	50	4	25	35	38	37	135	0.102963	-0.210434	0.0784384	-0.201102	0.0198607	-0.160221	0.0508194
cc32	1	1	23	2	3	4	NA	1	violin	10+	10+	5+	91	111	58	51	45	56	40	54	62	44	38	42	108	13	0.427083	0.692308	0.927837	0.75	0.4	0.7875	15	0	yes	0	0	36	35	12	28	111	-0.272783	0.333625	-0.178472	0.328461	-0.179905	0.342605	-0.223169
cc33	1	2	28	5	3	5	NA	1	horn	10+	10+	3-4	68	109	59	48	34	48	34	41	60	45	37	37	102	8	0.166667	0.923077	2.88201	0.875	0.0416667	0.925	2	5	no	100	20	16	40	43	42	141	0.0167807	-0.0072113	-0.0632179	-0.0121777	-0.0476057	-0.0142715	-0.187727
cc34	1	1	56	5	3	4	NA	1	piccolo	10+	10+	3-4	77	97	59	48	29	41	29	33	52	45	40	35	98	9	0.21875	0.692308	1.73166	0.5	0.0416667	0.8875	5	0	no	50	50	25	35	38	45	143	0.0758695	-0.0461081	0.17885	-0.0968429	0.203706	-0.0932638	0.210321
cc36	1	1	24	3	1	4	NA	1	cello	3-5	10+	1.2	81	93	44	46	47	46	30	42	54	38	37	38	89	13	0.427083	0.769231	1.51611	0.75	0.2	0.8375	4	0	no	3	4	21	35	13	37	106	-0.0802145	0.183979	-0.0133868	0.121419	0.018599	0.202174	-0.113965
cc38	1	1	29	4	3	5	NA	1	violin	10+	10+	5+	93	111	63	56	49	62	42	60	62	49	42	48	125	9	0.21875	0.615385	0.841621	0.5	0.2	0.7375	7	3	no	4	6	26	39	16	38	119	-0.225394	0.422337	-0.117285	0.366127	-0.0585621	0.35611	-0.188666
cc41	1	2	24	2	3	5	NA	1	violin	10+	10+	5+	95	107	59	48	45	48	40	55	61	45	34	41	112	18	0.6875	0.692308	1.73166	0.5	0.0416667	0.75	4	0	no	4	0	21	35	16	28	100	0.0755551	0.109338	0.14241	0.0673569	0.122298	0.170818	0.0478662
cc42	1	1	31	5	3	5	NA	1	cello	10+	10+	5+	77	96	58	48	43	54	37	52	54	45	36	42	108	16	0.583333	0.615385	0.571986	0.625	0.4	0.65	10	1	no	50	2	34	37	38	32	141	0.0121806	-0.0107967	0.0287828	-0.0701271	-0.000889058	-0.0999927	0.022054
cj01	2	2	34	5	2	5	NA	1	saxophone	10+	4-5	3-4	79	99	59	47	35	50	34	53	51	45	35	36	107	16	0.583333	0.846154	2.40615	0.75	0.0416667	0.95	500	1000	yes	5000	300	57	62	59	59	237	0.101369	-0.0355277	0.0913538	-0.0654929	0.0734909	-0.10515	0.0946346
cj02	2	2	39	5	2	5	NA	1	trumpet	10+	10+	3-4	66	112	57	48	38	57	33	38	63	43	38	43	108	16	0.583333	0.846154	2.40615	0.75	0.0416667	1	150	1000	yes	10000	300	45	62	62	59	228	0.387303	-0.323313	0.440351	-0.36773	0.378612	-0.329651	0.371476
cj07	2	2	59	5	2	5	NA	1	piano	10+	10+	2	77	104	55	48	28	51	36	46	58	41	36	38	99	12	0.375	1	3.46333	0.958333	0.0416667	1	300	200	no	1000	125	51	48	48	53	200	0.220703	-0.331705	0.230393	-0.390921	0.212796	-0.320029	0.235772
cj11	2	2	28	5	2	5	NA	1	guitar	10+	10+	5+	86	108	56	53	40	57	36	52	59	46	39	43	112	16	0.583333	0.692308	1.16026	0.625	0.2	0.7	900	500	yes	100000	150	59	57	63	54	233	-0.0702991	0.019105	-0.144909	0.0088127	-0.197132	0.0319594	-0.196404
cj13	2	2	33	4	2	4	NA	1	piano	10+	10+	5+	92	97	58	52	38	50	29	48	54	46	38	38	111	18	0.6875	0.692308	0.927837	0.75	0.4	0.7	100	500	yes	5000	2000	44	57	59	63	223	-0.221601	0.100839	-0.261407	0.138682	-0.28009	0.147293	-0.15911
cj14	2	2	26	5	2	4	NA	1	double_bass	10+	10+	5+	94	89	63	48	47	55	39	55	46	49	36	41	112	16	0.583333	0.923077	2.88201	0.875	0.0416667	0.975	1000	800	yes	1000	100	62	59	48	51	220	-0.21159	0.231874	-0.164445	0.207327	-0.130497	0.167158	-0.0519819
cj18	2	2	28	5	2	4	NA	1	saxophone	10+	10+	2	91	101	61	43	44	59	36	54	54	47	32	45	114	18	0.6875	0.923077	2.88201	0.875	0.0416667	0.9375	1000	500	yes	8000	100	62	57	60	51	230	0.138523	-0.580642	0.115621	-0.526215	0.0483167	-0.674625	0.864836
cj20	2	2	30	5	2	5	NA	1	double_bass	10+	10+	5+	97	112	61	53	47	63	40	58	63	47	39	49	122	13	0.427083	0.846154	2.40615	0.75	0.0416667	0.875	500	1000	yes	10000	100	57	62	62	51	232	0.20373	-0.0644575	0.239004	-0.13463	0.20212	-0.138445	0.161408
cj21	2	1	44	5	2	3	NA	1	voice	10+	10+	5+	83	99	47	47	49	56	35	48	55	35	31	43	97	12	0.375	0.923077	2.57329	0.958333	0.2	0.9375	100	100	yes	70	200	44	46	40	57	187	-0.0725789	-0.0471196	-0.0762004	0.0867959	-0.0392407	-0.0282628	0.00786877
cj23	2	2	69	5	2	5	NA	1	piano	3-5	10+	2	63	90	47	33	32	48	28	33	45	35	23	36	86	12	0.375	0.769231	2.0503	0.625	0.0416667	0.8	1500	5000	no	5000	500	63	63	59	60	245	-0.193619	0.19682	-0.198986	0.22402	-0.24128	0.192901	-0.162565
cj25	2	2	23	5	2	4	NA	1	trombone	10+	10+	5+	94	109	58	51	34	49	41	53	61	44	37	35	104	10	0.270833	0.846154	2.40615	0.75	0.0416667	0.975	200	100	yes	4000	20	50	46	55	42	193	-0.173949	0.0765985	-0.10049	0.0585003	-0.114707	0.0845005	-0.00242511
cj27	2	1	26	5	2	4	NA	1	voice	6-9	10+	2	98	103	45	54	45	49	38	54	60	32	39	36	99	18	0.6875	0.769231	2.0503	0.625	0.0416667	0.6625	500	80	yes	100	30	57	43	43	43	186	-0.0998214	0.0538224	-0.072766	0.120499	-0.0351947	0.0572909	0.0548487
cj28	2	1	54	5	2	4	NA	1	piano	10+	10+	3-4	85	110	53	52	33	43	31	45	61	39	38	29	90	15	0.53125	0.769231	2.0503	0.625	0.0416667	0.875	900	500	yes	900	990	59	57	46	62	224	-0.121976	0.0351411	-0.0977515	0.119658	-0.0740491	0.0936389	-0.0220058
cj30	2	2	21	2	2	5	NA	1	percussion	10+	10+	5+	93	103	56	47	43	54	38	57	57	43	33	40	108	15	0.53125	0.769231	1.51611	0.75	0.2	0.7375	200	80	yes	500	100	50	43	44	51	188	-0.130988	0.195796	-0.0465886	0.239897	-0.0249371	0.227678	-0.0432751
cj31	2	2	36	5	2	5	NA	1	piano	10+	10+	5+	89	103	59	54	40	48	33	52	55	45	39	34	104	18	0.6875	0.923077	2.88201	0.875	0.0416667	0.975	200	500	yes	2990	553	50	57	52	61	220	-0.107306	0.152725	-0.0786536	0.143107	-0.056381	0.185358	-0.218009
cj32	2	2	34	5	2	4	NA	1	piano	6-9	10+	3-4	79	87	53	41	26	43	32	47	45	39	30	30	93	16	0.583333	1	3.46333	0.958333	0.0416667	1	50	400	yes	3000	125	41	50	54	53	198	0.29338	-0.295686	0.223407	-0.285423	0.185188	-0.259197	0.25566
cj33	2	2	28	5	2	4	NA	1	electric_bass	10+	10+	5+	99	106	50	53	44	57	39	57	60	42	39	43	109	18	0.6875	NA	NA	NA	NA	NA	1000	500	yes	600	80	62	57	45	46	210	0.264744	-0.24108	0.276986	-0.244884	0.188585	-0.234824	0.257748
cj34	2	2	31	5	2	5	NA	1	bass_guitar	10+	10+	5+	99	108	61	53	43	59	40	60	59	47	39	45	122	13	0.427083	1	3.46333	0.958333	0.0416667	1	100	100	yes	3000	200	44	46	54	57	201	0.114568	-0.114159	0.179507	-0.138557	0.132013	-0.0675707	0.090315
cj37	2	2	27	5	2	5	NA	1	piano	10+	10+	5+	101	110	60	51	48	57	35	57	62	46	38	43	117	18	0.6875	0.769231	2.0503	0.625	0.0416667	1	200	200	yes	2000	200	50	48	50	57	205	0.179203	-0.129278	0.211764	-0.163921	0.191556	-0.236165	0.226848
cj38	2	2	30	5	2	5	NA	1	saxophone	3-5	10+	5+	86	103	56	48	40	57	40	53	55	42	36	43	110	13	0.427083	1	3.46333	0.958333	0.0416667	1	500	800	yes	5000	50	57	59	59	45	220	0.373509	-0.412126	0.441903	-0.371902	0.444489	-0.390431	0.454289
cj39	2	1	34	5	2	5	NA	1	saxophone	10+	10+	5+	79	104	54	49	38	54	41	51	57	46	36	40	109	18	0.6875	0.923077	2.88201	0.875	0.0416667	0.9875	500	350	yes	2500	10	57	49	51	40	197	0.5906	-0.635626	0.579149	-0.646985	0.49458	-0.654847	0.750501
cj40	2	2	45	5	2	5	NA	1	saxophone	6-9	10+	3-4	78	95	49	41	32	42	34	53	51	35	28	30	88	18	0.6875	0.769231	2.0503	0.625	0.0416667	1	500	500	yes	1200	100	57	57	49	51	214	0.161922	-0.295259	0.16642	-0.228764	0.203911	-0.265159	0.336534
cn02	0	1	50	2	1	5	NA	2	none	0	0	0	64	49	16	47	22	23	29	33	28	12	31	19	50	6	0.0625	0.461538	-0.253347	0.5	0.6	0.4625	20	0	no	20	0	38	35	27	28	128	0.211939	-0.262349	0.115248	-0.243581	0.041276	-0.246679	0.233257
cn04	0	2	24	2	1	6	5	2	none	0	0	0	68	63	11	43	31	23	25	37	34	9	29	20	45	15	0.53125	0.769231	1.51611	0.75	0.2	0.875	0	0	no	20	0	9	35	27	28	99	-0.284057	0.403254	-0.245691	0.360074	-0.237009	0.390293	-0.326402
cn08	0	2	27	2	3	6	5	2	voice	0	1	1.5	63	80	15	39	35	39	25	35	43	12	27	34	71	8	0.166667	0.846154	2.40615	0.75	0.0416667	0.9875	0	0	no	14	0	9	35	22	28	94	-0.11649	-0.0865895	-0.0536054	-0.0494346	-0.0872633	-0.00743676	-0.00300917
cn09	0	1	46	2	3	5	NA	2	none	0	0	0	36	65	11	36	26	16	28	18	36	7	27	13	34	13	0.427083	0.615385	0.421143	0.75	0.6	0.65	5	0	no	0	0	25	35	12	28	100	0.276063	-0.326246	0.293819	-0.340469	0.290816	-0.333023	0.457543
cn10	0	2	30	2	1	5	NA	2	none	0	0	0	65	92	17	41	39	35	26	27	51	12	30	29	64	13	0.427083	0.692308	1.16026	0.625	0.2	0.7625	0	0	no	20	0	9	35	27	28	99	-0.429427	0.372342	-0.374613	0.375393	-0.313371	0.332851	-0.386663
cn11	0	2	27	2	1	5	NA	2	drums	0	0	0	38	49	9	29	21	24	18	18	28	7	19	18	38	6	0.0625	0.538462	0.253347	0.5	0.4	0.5625	0	0	no	0	0	9	35	12	28	84	0.120833	-0.0909227	0.158759	-0.0822209	0.187577	-0.104905	0.218463
cn13	0	2	25	2	1	5	NA	2	recorder	0	0	0	84	64	10	52	37	15	36	48	39	7	37	13	49	16	0.583333	0.538462	0.0652923	0.625	0.6	0.5625	9	0	no	20	0	28	35	27	28	118	-0.105912	0.188926	-0.00530283	0.165725	0.0728158	0.105285	0.0756356
cn16	0	1	28	3	2	5	NA	2	none	0	0	0	66	78	17	41	32	38	29	30	44	11	29	30	64	9	0.21875	0.692308	0.927837	0.75	0.4	0.7125	1	0	no	20	3	11	35	27	34	107	0.0129535	-0.235219	-0.091891	-0.271198	-0.14024	-0.241279	0.0765815
cn17	0	1	26	2	1	6	5	2	voice	0	0	0	68	75	16	44	33	33	35	45	42	11	32	26	63	18	0.6875	0.769231	1.4037	0.875	0.4	0.7375	8	0	no	50	1	27	35	38	29	129	0.522478	-0.552607	0.516438	-0.554936	0.482064	-0.47794	0.495352
cn18	0	2	26	2	1	5	NA	2	none	0	0	0	81	85	18	39	41	44	32	40	52	13	28	36	74	8	0.166667	0.769231	1.4037	0.875	0.4	0.8	2	0	no	5	0	16	35	17	28	96	-0.155946	0.0819884	-0.0676042	0.0604389	-0.111663	0.0810316	-0.0227134
cn19	0	1	35	2	1	5	NA	2	voice	0	0	0	46	61	18	40	38	15	26	20	34	11	28	12	36	16	0.583333	0.692308	0.927837	0.75	0.4	0.75	2	0	no	0	0	16	35	12	28	91	0.0404251	0.0078049	0.0468657	-0.0132758	-0.0121683	0.0516237	0.0252827
cn23	0	1	43	7	1	4	NA	2	none	0	0	0	63	78	11	51	42	34	30	30	43	9	37	28	58	15	0.53125	0.615385	0.571986	0.625	0.4	0.75	0	0	no	0	0	9	35	12	28	84	-0.582052	0.528761	-0.543553	0.56904	-0.494456	0.480581	-0.565871
cn24	0	2	35	5	1	4	NA	2	voice	0	0	0	58	81	16	36	25	40	20	26	42	11	27	31	58	7	0.114583	0.538462	0.253347	0.5	0.4	0.6875	0	0	no	0	0	9	35	12	28	84	-0.198434	0.106115	-0.275291	0.0716338	-0.335853	0.100161	-0.165038
cn27	0	1	38	4	2	3	NA	2	none	0	0	0	91	73	9	48	44	33	39	54	39	7	29	28	62	18	0.6875	0.692308	0.897002	0.875	0.6	0.5625	3	0	no	10	0	18	35	21	28	102	-0.549126	0.573444	-0.489441	0.514513	-0.454563	0.529334	-0.582472
cn28	0	2	40	5	1	4	NA	2	none	0	0	0	73	95	9	49	40	26	27	35	52	7	35	20	57	12	0.375	0.692308	0.927837	0.75	0.4	0.85	3	0	no	10	0	18	35	21	28	102	0.378775	-0.142365	0.393437	-0.192542	0.443379	-0.15747	0.424933
cn29	0	2	53	8	1	3	NA	2	Voice	0	0	0.5	64	80	13	41	38	33	32	31	49	11	29	25	57	9	0.21875	0.692308	0.927837	0.75	0.4	0.775	0	0	no	0	0	9	35	12	28	84	-0.183276	0.0493803	-0.164567	0.0865007	-0.194351	0.0959007	-0.0838617
cn33	0	2	25	5	1	4	NA	2	piano	2	1	1	74	64	22	43	34	32	33	41	36	18	30	23	59	12	0.375	0.538462	0.253347	0.5	0.4	0.6875	5	0	no	10	0	25	35	21	28	109	0.216515	-0.339752	0.162876	-0.303696	0.0931326	-0.265915	0.17293
cn36	0	1	19	7	1	3	NA	2	drums_voice	0	0	0	74	69	15	52	41	32	28	45	43	10	36	25	60	12	0.375	0.615385	0.571986	0.625	0.4	0.75	0	0	no	0	0	9	35	12	28	84	-0.179785	0.28334	-0.188565	0.177163	-0.157943	0.134149	-0.150139
cn37	0	2	20	2	1	6	5	2	voice	0	0	0	84	108	25	49	49	49	35	46	62	18	36	43	94	16	0.583333	0.538462	0.253347	0.5	0.4	0.5875	1	0	no	0	0	11	35	12	28	86	-0.136825	0.175232	-0.0700673	0.129399	-0.0439285	0.180366	-0.0793865
cn38	0	2	23	7	1	4	NA	2	voice	0	0	0	65	81	11	38	43	29	26	31	44	8	27	23	52	12	0.375	0.615385	0.571986	0.625	0.4	0.7125	2	0	no	0	0	16	35	12	28	91	-0.207602	0.254858	-0.117395	0.214251	-0.0960757	0.220057	-0.117642
Marked in orange are contexts that produced entropy scores outside the intended quadrants and which may therefore be excluded from the analysis.
																																					These two people answered "NA".Their responses have been replaced by the median of responses from the other jazz participants
																																								MEAN	Classical	129.45	-0.0460479	0.0546847	-0.00634866	0.0434423	0.01668	0.0460547	-0.0194587
																																									Jazz	213.227	0.0739011	-0.111057	0.0888028	-0.100824	0.0710067	-0.11439	0.150317
																																									Non	98.55	-0.0674476	0.0494699	-0.0500072	0.0336388	-0.0533912	0.0433493	-0.015161
[truncated: 54 more columns]

## Sheet: by.context
stim.name	cand.name	group	melody.id	note.id	melody.name	syncopation	tempo.presentation	swing.ratio	nPVI	no.events	distinct.pitches	keysig	pM	cpitch.preprobe	avg.B.IC.run2_32	avg.G.IC.run2_32	avg.Diff.IC.run2_32	avg.B.H.run2_32	avg.G.H.run2_32	avg.Diff.H.run2_32	preprobe.B.IC.run2_32	preprobe.G.IC.run2_32	preprobe.Diff.IC.run2_32	preprobe.B.H.run2_32	preprobe.G.H.run2_32	preprobe.Diff.H.run2_32	B.H.run1_32	G.H.run1_32	Diff.H.run1_32	B.H.run2_32	G.H.run2_32	Diff.H.run2_32	B.H.run2_9	G.H.run2_9	Diff.H.run2_9	ExpUnc.context	cc01	cc03	cc04	cc05	cc06	cc07	cc08	cc17	cc21	cc22	cc28	cc30	cc31
bG_A	Bg_17	1	23	333	Constell	0	162	2.2393	4.21	20	12	0	68	63	2.4227	5.1994	-2.7767	2.577	2.582	-0.0049	0.1675	7.0224	-6.8548	0.8774	2.2608	-1.3834	0.6267	2.4535	-1.8268	0.6819	2.9756	-2.2937	0.2987	2.3996	-2.1009	ExpUnc_bG50d_A_p0	2	7	1	3	2	5	5	6	3	6	9	8	7
bG_Bt	Bg_21t	1	46	267	Perhaps	0	100	2.5191	14.22	16	11	-2	70	68	2.0651	3.8597	-1.7946	2.5364	2.328	0.2084	0.3834	2.2531	-1.8697	1.5025	3.4421	-1.9396	0.4935	3.0307	-2.5372	0.5585	2.9989	-2.4404	0.3284	2.2435	-1.9151	ExpUnc_bG50d_Bt_p0	2	9	4	8	8	1	7	8	5	8	9	4	9
bG_C	Bg_35	1	60	244	Yardbird	2	112	2.4649	34.5	26	14	0	67	70	2.957	4.6227	-1.6657	2.7135	2.483	0.2305	1.5927	2.2719	-0.6792	2.6406	3.4136	-0.773	0.4814	2.3226	-1.8412	0.5585	2.9723	-2.4137	0.5257	2.2396	-1.7139	ExpUnc_bG50d_C_p0	4	3	5	7	4	2	3	1	4	3	5	8	3
bG_D	Bg_03	1	2	389	An_Oscar	0	115	2.4514	14.29	15	11	0	64	61	2.4701	5.8664	-3.3963	2.5758	2.3211	0.2547	4.4495	12.2919	-7.8424	3.4118	3.18	0.2318	0.7983	1.9637	-1.1654	0.9079	1.927	-1.0191	0.6946	1.0142	-0.3196	ExpUnc_bG50d_D_p0	3	3	4	7	2	5	6	8	3	3	6	4	5
bG_E	Bg_33	1	31	155	Klaun_St	1	150	2.2934	14.1	27	12	-1	70	57	1.7924	4.3729	-2.5806	2.3904	2.3085	0.0818	3.8745	9.5708	-5.6963	2.9666	0.6826	2.284	0.407	2.6288	-2.2219	0.4606	2.6153	-2.1546	0.3563	2.3107	-1.9544	ExpUnc_bG50d_E_p0	4	9	6	4	6	6	4	1	6	6	6	3	5
bG_Ft	Bg_31t	1	11	152	Bird_Get	0	170	2.2032	9.41	18	12	-6	71	58	1.8252	4.8505	-3.0252	2.3064	2.2988	0.0077	3.9048	9.5708	-5.666	2.842	0.6826	2.1594	0.4142	2.6971	-2.2829	0.4626	2.6099	-2.1473	0.3187	2.3101	-1.9914	ExpUnc_bG50d_Ft_p0	6	9	5	3	6	8	7	3	4	6	9	1	7
bG_G	Bg_11	1	18	145	Celerity	0	138	2.3476	7.08	33	17	-2	67	73	1.6848	4.792	-3.1072	2.4267	2.391	0.0357	0.4105	6.4363	-6.0258	1.5847	2.5861	-1.0014	0.8322	3.2367	-2.4045	1.1217	3.1605	-2.0389	0.9026	2.489	-1.5864	ExpUnc_bG50d_G_p0	6	6	3	3	7	4	5	3	4	7	8	5	3
bG_H	Bg_27	1	54	138	Si_Si	0	94	2.5461	0	13	10	-1	73	73	2.6036	5.268	-2.6644	2.5323	2.3835	0.1488	0.2066	8.2366	-8.03	1.023	3.0469	-2.024	0.6663	3.4156	-2.7493	0.7515	3.1092	-2.3577	0.6204	2.3102	-1.6898	ExpUnc_bG50d_H_p0	1	5	3	2	5	5	4	6	2	3	8	1	8
bG_I	Bg_18	1	14	529	Blues_(F	0	133	2.3724	2.76	30	15	-2	62	64	1.6638	4.4531	-2.7892	2.4782	2.4997	-0.0215	2.6458	9.2029	-6.5571	2.3731	2.3768	-0.0037	1.16	1.7845	-0.6245	1.2333	2.2756	-1.0423	1.0294	1.223	-0.1936	ExpUnc_bG50d_I_p0	4	7	4	4	3	9	6	7	2	7	5	4	9
bG_J	Bg_07	1	12	332	Bloomdid	1	120	2.4288	15.79	20	13	-2	63	58	3.087	5.2349	-2.1479	2.7406	2.7356	0.005	8.2443	8.3098	-0.0655	0.9699	1.6347	-0.6649	0.8815	3.1355	-2.254	1.7182	3.1103	-1.392	1.3467	2.333	-0.9863	ExpUnc_bG50d_J_p0	9	3	1	6	6	2	5	2	3	4	9	1	6
bG_K	Bg_09	1	14	223	Blues_(F	0	133	2.3724	3.33	25	13	-2	60	58	2.2327	4.3094	-2.0767	2.348	2.4407	-0.0928	5.7271	8.3098	-2.5827	3.2923	1.6347	1.6576	0.9701	3.131	-2.1609	1.718	3.0849	-1.3669	1.3467	2.3266	-0.9799	ExpUnc_bG50d_K_p0	8	5	1	6	4	3	2	3	3	4	4	2	4
bG_L	Bg_16	1	36	510	Merry-Go	0	150	2.2934	0	17	13	-2	67	58	2.6216	6.1093	-3.4877	2.58	2.345	0.235	5.449	8.3098	-2.8608	3.1882	1.6347	1.5535	1.1151	3.194	-2.0789	1.7206	3.1064	-1.3857	1.3485	2.329	-0.9804	ExpUnc_bG50d_L_p0	1	7	2	8	3	7	3	5	4	6	8	2	7
gB_A	Gb_03	2	2	314	An_Oscar	1	115	2.4514	15.45	45	16	0	64	66	2.1431	5.301	-3.1579	2.4161	2.3376	0.0785	6.7815	7.2027	-0.4212	2.4024	2.7166	-0.3142	3.3936	0.5303	2.8632	3.7229	0.5303	3.1926	2.6799	0.2846	2.3952	ExpUnc_gB50d_A_p0	6	3	1	6	3	7	4	5	2	3	6	2	5
gB_B	Gb_28	2	23	390	Constell	0	162	2.2393	0	32	16	0	64	66	2.4271	4.5759	-2.1488	2.5839	2.5359	0.0479	3.8931	7.2855	-3.3925	4.0098	3.0009	1.0089	3.0992	2.0613	1.0379	3.011	2.0113	0.9996	2.4989	1.2986	1.2003	ExpUnc_gB50d_B_p0	8	9	2	6	7	4	8	8	3	5	4	8	8
gB_C	Gb_04	2	23	272	Constell	0	162	2.2393	13.64	25	13	0	70	66	2.0748	4.1497	-2.0749	2.5841	2.5542	0.0299	6.2634	7.5033	-1.2399	2.4282	2.6178	-0.1897	3.3548	0.5303	2.8244	3.1917	0.5303	2.6613	2.2954	0.2846	2.0107	ExpUnc_gB50d_C_p0	3	7	5	6	4	2	4	4	5	1	9	8	5
gB_D	Gb_12	2	23	457	Constell	1	162	2.2393	16.5	26	14	0	70	66	2.1962	4.5218	-2.3256	2.663	2.5343	0.1288	5.7021	7.3038	-1.6017	3.0939	2.7347	0.3593	3.1461	0.5303	2.6158	2.9561	0.5303	2.4257	2.2161	0.2846	1.9315	ExpUnc_gB50d_D_p0	2	6	4	4	4	4	5	5	4	2	9	7	8
gB_E	Gb_30	2	2	110	An_Oscar	1	115	2.4514	30.56	13	8	0	65	66	4.4889	6.9705	-2.4816	2.8558	2.2853	0.5705	2.7557	9.0115	-6.2558	3.8136	2.3265	1.4871	2.8824	0.5303	2.3521	2.4125	0.5303	1.8822	1.8067	0.2846	1.5221	ExpUnc_gB50d_E_p0	3	4	2	5	2	6	6	3	5	1	4	1	4
gB_Ft	Gb_01t	2	8	104	Ballade	3	70	2.6544	21.23	28	14	-3	71	69	2.9216	4.1227	-1.2011	2.7197	2.0891	0.6306	7.2344	8.0834	-0.8491	2.5629	2.7487	-0.1858	3.6307	0.5303	3.1004	3.5164	0.5303	2.9861	2.5605	0.2846	2.2759	ExpUnc_gB50d_Ft_p0	6	5	1	3	1	4	8	3	2	1	9	3	3
gB_G	Gb_32	2	37	389	Mohawk_N	2	84	2.5913	29.73	15	7	-2	65	63	3.0359	3.6451	-0.6092	3.0618	2.4518	0.61	2.0238	3.4578	-1.434	3.7545	2.2612	1.4933	3.2517	0.8742	2.3775	3.7581	0.8742	2.8839	2.496	0.743	1.753	ExpUnc_gB50d_G_p0	7	8	4	7	8	5	7	1	5	7	9	5	3
gB_Ht	Gb_23	2	23	86	Constell	0	162	2.2393	1.95	42	18	0	64	63	2.6537	4.4235	-1.7698	2.7287	2.4757	0.253	1.8942	2.8137	-0.9195	3.9771	2.7858	1.1913	3.4524	1.2072	2.2451	3.5168	1.2073	2.3095	2.3891	1.0563	1.3329	ExpUnc_gB50d_Ht_p0	8	7	6	5	6	7	7	7	6	6	2	5	7
gB_I	Gb_25	2	28	149	K._C._Bl	1	63	2.686	18.77	24	11	0	69	61	2.4215	3.4631	-1.0416	2.7827	2.2521	0.5306	2.806	8.7265	-5.9204	3.2303	2.3555	0.8748	3.6272	0.6826	2.9446	3.4621	0.6826	2.7795	2.533	0.3611	2.1719	ExpUnc_gB50d_I_p0	2	9	3	7	1	4	5	6	3	5	7	2	8
gB_J	Gb_34	2	48	347	Relaxing	1	90	2.5642	31.28	14	10	-5	65	66	3.6269	4.2451	-0.6182	3.1826	2.3821	0.8005	2.2629	2.8326	-0.5696	4.0658	2.795	1.2709	3.3682	1.2075	2.1607	3.5495	1.2071	2.3423	2.4243	1.0562	1.3681	ExpUnc_gB50d_J_p0	2	4	1	3	4	3	7	7	3	5	7	6	8
gB_K	Gb_07	2	2	526	An_Oscar	3	115	2.4514	39.52	19	6	0	65	66	3.5554	6.3261	-2.7707	2.7787	2.196	0.5827	6.7188	7.052	-0.3332	2.4297	2.7414	-0.3117	3.2649	0.5304	2.7345	2.2553	0.5304	1.7249	1.0489	0.2847	0.7643	ExpUnc_gB50d_K_p0	7	4	2	7	7	7	9	5	7	8	9	7	2
gB_L	Gb_29	2	18	70	Celerity	2	138	2.3476	29	21	12	-2	71	64	3.3371	4.8177	-1.4806	2.8931	2.3838	0.5093	2.037	7.9721	-5.9351	3.3601	3.443	-0.0829	3.417	1.6355	1.7816	3.3368	1.6355	1.7013	2.5271	0.8989	1.6282	ExpUnc_gB50d_L_p0	5	7	3	4	8	6	5	8	5	4	8	4	6
[truncated: 53 more columns]
