# Supplementary material for: "If You Have to Ask, You'll Never Know": Effects of Specialised Stylistic Expertise on Predictive Processing of Music
Source: PLOS journal article supplement (doi:10.1371/journal.pone.0163584), 2016-10-12
Supplement: S5 (10.1371/journal.pone.0163584.s005) [file journal.pone.0163584.s005]

## S2 Text. Stimulus matching

Stimuli in the two conditions were matched on musical features and information-theoretic properties to avoid confounding factors in the experimental manipulation (Table A in S2 Text). These were duration, metrical strength, and pitch height of the probe tone, musical key, tempo, and total number of events, and average entropy, information content, and median pitch height of the context as a whole. Stimuli were not fully matched on average bebop entropy, but this was not considered problematic given our experimental hypotheses.

**Table A. Stimulus matching.** Matching and differentiation of stimuli on musical features and information-theoretic properties estimated by the IDyOM model

|                    |                               | Condition              |                        | Indep.-<br>samples |          | Mann-<br>Whitney |          | Chi-square<br>test |          |
|--------------------|-------------------------------|------------------------|------------------------|--------------------|----------|------------------|----------|--------------------|----------|
|                    |                               | High bebop<br>entropy  | Low bebop<br>entropy   | <i>t</i> (18)      | <i>p</i> | <i>U</i> (20)    | <i>p</i> | $\chi^2$ (5)       | <i>p</i> |
|                    |                               | <i>M</i> ( <i>sd</i> ) | <i>M</i> ( <i>sd</i> ) |                    |          |                  |          |                    |          |
| Probe-tone         | Duration                      | 9.5 (3.4)              | 10.0 (3.3)             | 0.33               | .743     |                  |          |                    |          |
|                    | Metrical strength             | -2.4 (1.4)             | -1.7 (1.2)             | 1.24               | .229     |                  |          |                    |          |
|                    | Pitch height                  | 64.6 (3.3)             | 65.5 (6.1)             |                    |          | 39               | .436     |                    |          |
|                    | Bebop entropy ②, 9t           | 2.39 (0.08)            | 0.74 (0.14)            |                    |          | 0                | <.001    |                    |          |
|                    | General entropy ②, 9t         | 0.55 (0.11)            | 2.33 (0.02)            |                    |          | 0                | <.001    |                    |          |
|                    | Bebop entropy ②, 32t          | 3.34 (0.13)            | 0.98 (0.17)            |                    |          | 0                | <.001    |                    |          |
|                    | General entropy ②, 32t        | 0.83 (0.12)            | 2.97 (0.06)            |                    |          | 0                | <.001    |                    |          |
|                    | Abs entropy difference ①, 32t | 2.53 (0.41)            | 2.24 (0.29)            |                    |          | 29               | .123     |                    |          |
|                    | Abs entropy difference ②, 9t  | 1.84 (0.38)            | 1.59 (0.45)            |                    |          | 35               | .280     |                    |          |
|                    | Abs entropy difference ②, 32t | 2.52 (0.48)            | 2.00 (0.44)            |                    |          | 21               | .029     |                    |          |
| Context            | Key signature                 | -                      | -                      |                    |          |                  |          | 8.28               | .141     |
|                    | Number of events              | 25.3 (11.0)            | 21.5 (6.1)             | -0.96              | .351     |                  |          |                    |          |
|                    | Notated tempo                 | 225 (88.9)             | 266 (51.8)             | 1.25               | .229     |                  |          |                    |          |
|                    | Median pitch height           | 67.4 (3.1)             | 67.5 (3.7)             | 0.07               | .949     |                  |          |                    |          |
|                    | Mean Bebop entropy ②, 32t     | 2.79 (0.33)            | 2.52 (0.15)            | -3.24              | .005     |                  |          |                    |          |
|                    | Mean General entropy ②, 32t   | 2.37 (0.14)            | 2.43 (0.14)            | 0.88               | .391     |                  |          |                    |          |
|                    | Mean Bebop IC ②, 32t          | 2.89 (0.77)            | 2.33 (0.49)            | -1.95              | .067     |                  |          |                    |          |
|                    | Mean General IC ②, 32t        | 4.57 (1.00)            | 4.86 (0.63)            | 0.79               | .438     |                  |          |                    |          |
| Pre-<br>probe-tone | Bebop IC ②, 32t               | 3.98 (0.70)            | 3.00 (0.91)            |                    |          | 35               | .280     |                    |          |
|                    | General IC ②, 32t             | 6.49 (0.78)            | 7.03 (0.85)            |                    |          | 42               | .579     |                    |          |

①: First model run; ②: Second model run; 9t: 9-tone entropy; 32t: 32-tone entropy.
