# Supplementary material for: "If You Have to Ask, You'll Never Know": Effects of Specialised Stylistic Expertise on Predictive Processing of Music
Source: PLOS journal article supplement (doi:10.1371/journal.pone.0163584), 2016-10-12
Supplement: S7 (10.1371/journal.pone.0163584.s007) [file journal.pone.0163584.s007]

## **S4 Text. Inferred uncertainty analysis excluding outliers**

Prior to analysis of mean inferred uncertainty data, Shapiro-Wilk's test showed non-normality in the high bebop entropy condition specifically for jazz musicians,  $W(20) = 0.846$ ,  $p = .003$ . Due to slight bimodality caused by four outliers grouped close together, normality could only be obtained when excluding all four jazz musicians,  $W(18) = 0.968$ ,  $p = .982$ . When doing so and re-running the analysis reported above (i.e. 3x2 mixed ANOVA and separate paired-samples  $t$ -tests for each expertise group), the findings remained fully robust with both a significant expertise-by-condition interaction,  $F(2, 55) = 6.627$ ,  $p = .003$ ,  $\eta^2_p = .194$ , and significant differences in inferred uncertainty between the two conditions for jazz musicians,  $t(17) = 3.586$ ,  $p = .002$ . Similarly, expertise effects were significant in the condition with low bebop entropy,  $F(2,55) = 3.177$ ,  $p = .049$ , but remained non-significant for high-bebop-entropy stimuli,  $F(2,55) = 2.179$ ,  $p = .124$ .
